# Supplementary material for: Rational design of Co-based redox mediators for dye-sensitized solar cells by density functional theory
Source: Royal Society of Chemistry journal article supplement (doi:10.1039/c4ra04605f), 2014-01-01
Supplement: c4ra04605f1.pdf [file c4ra04605f1.pdf]

Supplementary data for:

Rational Design of Co-based Redox Mediators  
for Dye Sensitized Solar Cells by Density Functional Theory

Zhu-Zhu Sun<sup>a,c</sup>, Kui-Ming Zheng<sup>a,c</sup>, Quan-Song Li<sup>a,c,\*</sup>, Ze-Sheng Li<sup>a,b,c,d,\*</sup>

<sup>a</sup>*Key Laboratory of Cluster Science of Ministry of Education, China*

<sup>b</sup>*Beijing Key Laboratory for Chemical Power Source and Green Catalysis, China*

<sup>c</sup>*School of Chemistry, Beijing Institute of Technology, Beijing 100081, China*

<sup>d</sup>*The Academy of Fundamental and Interdisciplinary Sciences, Harbin Institute of Technology,  
Harbin 150080, China*

*Fax: +86 10 68911354; Tel: +86 10 68918670;*

*E-mail: Q.-S. Li: [liquansong@bit.edu.cn](mailto:liquansong@bit.edu.cn), Z.-S. Li: [zeshengli@bit.edu.cn](mailto:zeshengli@bit.edu.cn)*

## Part 1

### Cartesian coordinates of the optimized structures for classic and new designed redox mediators in acetonitrile at B3LYP/LANL2DZ level.

|        |             |             |             |             |             |             |             |
|--------|-------------|-------------|-------------|-------------|-------------|-------------|-------------|
| [C1]2+ | N           | -0.37338200 | -0.25398300 | -1.99298100 |             |             |             |
| Co     | -0.07194700 | -0.00009100 | 0.00002700  | C           | 2.54267400  | 1.18311100  | -0.14371800 |
| C      | -2.62088600 | -0.15098400 | -1.18228600 | C           | 2.54353400  | -1.18141500 | 0.14336400  |
| C      | -2.62071900 | 0.14950500  | 1.18294800  | C           | 3.95051900  | -1.20522000 | 0.14830600  |
| C      | -4.02591800 | 0.15224000  | 1.21222800  | C           | 4.65302600  | 0.00162500  | -0.00004900 |
| C      | -4.72542600 | -0.00118400 | 0.00053600  | C           | 3.94964500  | 1.20795000  | -0.14847200 |
| C      | -4.02608900 | -0.15432600 | -1.21129200 | C           | 1.68588400  | 2.38746600  | -0.28879800 |
| C      | -1.70620300 | -0.29822700 | -2.33251500 | C           | -0.52547500 | 3.17731500  | -0.38943200 |
| C      | 0.56215000  | -0.38009700 | -2.96282800 | C           | -0.09160200 | 4.50592300  | -0.54433100 |
| C      | 0.21722500  | -0.55440700 | -4.31379200 | C           | 1.29127500  | 4.76325100  | -0.56910600 |
| C      | -1.14269600 | -0.60050700 | -4.66837700 | C           | 2.19301100  | 3.69225700  | -0.43976500 |
| C      | -2.11756800 | -0.47107500 | -3.66316300 | H           | 4.49059600  | -2.13607500 | 0.26511300  |
| H      | -4.56454000 | 0.27045600  | 2.14462700  | H           | 5.73786400  | 0.00203000  | 0.00004500  |
| H      | -5.81025000 | -0.00142200 | 0.00064600  | H           | 4.48905300  | 2.13920600  | -0.26516800 |
| H      | -4.56483800 | -0.27275000 | -2.14359000 | H           | -1.58255200 | 2.93488400  | -0.36487300 |
| H      | 1.59948800  | -0.34148700 | -2.65500800 | H           | -0.81756700 | 5.30561300  | -0.64132000 |
| H      | 0.99898600  | -0.65086100 | -5.05869500 | H           | 1.66283800  | 5.77617400  | -0.68634100 |
| H      | -1.44032300 | -0.73442600 | -5.70320100 | H           | 3.25984300  | 3.88001900  | -0.45691500 |
| H      | -3.17131700 | -0.50526500 | -3.91459000 | C           | -0.52321800 | -3.17772000 | 0.38930700  |
| C      | 0.56257200  | 0.38020300  | 2.96282800  | C           | -0.08842600 | -4.50608400 | 0.54372800  |
| C      | 0.21784500  | 0.55422100  | 4.31388000  | C           | 1.29462700  | -4.76251700 | 0.56798500  |
| C      | -1.14202700 | 0.59955900  | 4.66875700  | C           | 2.19562300  | -3.69088600 | 0.43875100  |
| C      | -2.11704400 | 0.46969500  | 3.66374200  | C           | 1.68759400  | -2.38638400 | 0.28833500  |
| C      | -1.70586800 | 0.29718100  | 2.33299000  | H           | -1.58045900 | -2.93596900 | 0.36513200  |
| H      | 1.59986600  | 0.34216800  | 2.65478600  | H           | -0.81383700 | -5.30628200 | 0.64067400  |
| H      | 0.99971200  | 0.65102100  | 5.05862600  | H           | 1.66689500  | -5.77523100 | 0.68478500  |
| H      | -1.43950600 | 0.73323400  | 5.70365500  | H           | 3.26258400  | -3.87794400 | 0.45550100  |
| H      | -3.17075600 | 0.50328900  | 3.91540400  | N           | 0.34198000  | -2.14646400 | 0.26492600  |
| N      | -0.37309900 | 0.25368600  | 1.99317100  | N           | 1.87403300  | 0.00060300  | -0.00020800 |
| N      | -1.96388700 | -0.00061100 | 0.00027000  | N           | 0.34043400  | 2.14666600  | -0.26497600 |

[C1]3+

Co -0.00000200 -0.00000800 -0.00016500  
 C 2.52554800 0.85322600 0.84176000  
 C 2.52685500 -0.85006000 -0.84107000  
 C 3.93044800 -0.86979500 -0.86097900  
 C 4.62426400 0.00294800 0.00053900  
 C 3.92911300 0.87475000 0.86196500  
 C 1.58543300 1.66004600 1.63893700  
 C -0.70981100 2.06733400 2.03974400  
 C -0.39752000 3.04153500 3.00130300  
 C 0.95026000 3.32182800 3.27956900  
 C 1.95462000 2.62024800 2.58805200  
 H 4.47123000 -1.53731200 -1.52015200  
 H 5.70869100 0.00368000 0.00060500  
 H 4.46885400 1.54307200 1.52117000  
 H -1.73963600 1.83385400 1.80883400  
 H -1.20111600 3.55920400 3.51138100  
 H 1.21824000 4.06950400 4.01805800  
 H 3.00096400 2.81959600 2.78652900  
 C -0.70650100 -2.06786600 -2.04063600  
 C -0.39257000 -3.04177400 -3.00193900  
 C 0.95569100 -3.32091800 -3.27909800  
 C 1.95886100 -2.61820500 -2.58703000  
 C 1.58803000 -1.65803400 -1.63853600  
 H -1.73672000 -1.83531200 -1.81053700  
 H -1.19530200 -3.56025600 -3.51254500  
 H 1.22493500 -4.06854400 -4.01718000  
 H 3.00554200 -2.81681300 -2.78446300  
 N 0.25888100 -1.39286200 -1.37532700  
 N 1.88415000 0.00120300 0.00023000  
 N 0.25671000 1.39341300 1.37502700  
 C -2.52668900 0.83982300 -0.85175900  
 C -2.52571500 -0.84301000 0.85152700

C -3.92926900 -0.86389700 0.87213500  
 C -4.62426300 -0.00284200 -0.00015300  
 C -3.93029500 0.85902700 -0.87243100  
 C -1.58768200 1.63766400 -1.65918400  
 C 0.70694800 2.04066000 -2.06763000  
 C 0.39325300 3.00205900 -3.04151100  
 C -0.95495300 3.27906700 -3.32110300  
 C -1.95828600 2.58653400 -2.61908300  
 H -4.46911500 -1.52343100 1.54004800  
 H -5.70869000 -0.00351800 -0.00019600  
 H -4.47098300 1.51780900 -1.54040700  
 H 1.73710000 1.81072200 -1.83461200  
 H 1.19610500 3.51289100 -3.55958100  
 H -1.22402000 4.01728900 -4.06865500  
 H -3.00491600 2.78409400 -2.81784000  
 C 0.70936000 -2.03997300 2.06730900  
 C 0.39684400 -3.00160000 3.04136900  
 C -0.95099300 -3.28003100 3.32121400  
 C -1.95519100 -2.58882900 2.61909700  
 C -1.58577800 -1.63984200 1.65885900  
 H 1.73923500 -1.80899300 1.83416200  
 H 1.20032800 -3.51150800 3.55938200  
 H -1.21913600 -4.01847600 4.06887600  
 H -3.00158500 -2.78731000 2.81816900  
 N -0.25700100 -1.37549400 1.39292600  
 N -1.88415000 -0.00118600 -0.00008700  
 N -0.25859400 1.37485900 -1.39334200

[C2]2+

Co 0.07635800 -0.10380700 -0.09150600  
 N -0.47413200 2.00744100 -0.28141400  
 N 0.50902400 0.12370600 1.86726100  
 N -1.87352200 -0.22111800 0.00633000  
 N 1.96914000 -0.03891200 -0.22475500

|   |             |             |             |        |             |             |             |
|---|-------------|-------------|-------------|--------|-------------|-------------|-------------|
| N | 0.26301500  | -0.31357500 | -2.09089200 | C      | 2.35134800  | 0.37511300  | 3.42454200  |
| N | -0.23205400 | -2.29983800 | 0.16906100  | C      | 1.43981900  | 0.46131800  | 4.49206100  |
| C | 0.33734300  | -3.51190100 | 0.28420200  | C      | 0.06196400  | 0.37693000  | 4.22504500  |
| C | -0.65283300 | -4.53488300 | 0.42172300  | C      | -0.36509800 | 0.20892400  | 2.89689100  |
| C | -1.87677900 | -3.88002300 | 0.38477500  | C      | 2.70415200  | 0.09892600  | 0.91432300  |
| N | -1.60897000 | -2.53048200 | 0.23193100  | C      | 4.10530500  | 0.11964900  | 0.84357300  |
| H | 1.41235000  | -3.61187900 | 0.26535700  | C      | 4.71866800  | -0.00411000 | -0.41983000 |
| H | -0.48859600 | -5.59505200 | 0.53129400  | C      | 3.94663300  | -0.15072200 | -1.58671700 |
| H | -2.87940600 | -4.26997500 | 0.45407700  | C      | 2.55350700  | -0.16543300 | -1.43529500 |
| C | -1.83056200 | 2.17484400  | -0.24931100 | H      | 3.41778100  | 0.44076900  | 3.60708100  |
| C | -2.41239500 | 3.45291200  | -0.34812500 | H      | 1.79921200  | 0.59214300  | 5.50740200  |
| C | -1.57488000 | 4.57416000  | -0.48289000 | H      | -0.67252900 | 0.43933700  | 5.01991300  |
| C | -0.18020300 | 4.39243100  | -0.51460100 | H      | -1.41867200 | 0.14225600  | 2.65618900  |
| C | 0.33028500  | 3.08635000  | -0.40981000 | H      | 4.70825300  | 0.22606300  | 1.73659400  |
| C | -2.61671400 | 0.92409600  | -0.10400500 | H      | 5.80055200  | 0.01073600  | -0.49609000 |
| C | -4.01925500 | 0.86354700  | -0.07828700 | H      | 4.41423300  | -0.24904200 | -2.55853900 |
| C | -4.64669700 | -0.38810900 | 0.06138600  |        |             |             |             |
| C | -3.87903900 | -1.55615300 | 0.17062100  | [C2]3+ |             |             |             |
| C | -2.48078700 | -1.42488400 | 0.13627000  | Co     | 0.00002800  | -0.13332300 | -0.00021300 |
| H | -3.48755100 | 3.58229800  | -0.32009000 | N      | -0.36898500 | 1.24791900  | -1.34370100 |
| H | -2.00460100 | 5.56765600  | -0.56027100 | N      | 0.36870500  | 1.24485500  | 1.34645200  |
| H | 0.49714900  | 5.23296700  | -0.61691700 | N      | -1.88289900 | -0.17009700 | 0.12396100  |
| H | 1.39888900  | 2.90110200  | -0.42918700 | N      | 1.88295200  | -0.16941400 | -0.12448400 |
| H | -4.61716800 | 1.76118200  | -0.16653000 | N      | 0.16570100  | -1.50202700 | -1.39361300 |
| H | -5.72923900 | -0.45249000 | 0.08308900  | N      | -0.16532700 | -1.50525900 | 1.39009600  |
| H | -4.35358700 | -2.52331000 | 0.27723600  | C      | 0.57254900  | -2.31462100 | 2.17199800  |
| C | -0.43718600 | -0.46042400 | -3.22969600 | C      | -0.27842200 | -3.11525500 | 2.98539400  |
| C | 0.44170300  | -0.55498500 | -4.35112200 | C      | -1.58297200 | -2.75521700 | 2.66197800  |
| C | 1.73100800  | -0.45776700 | -3.83829500 | N      | -1.50715300 | -1.77839700 | 1.69446300  |
| N | 1.61127900  | -0.31147200 | -2.47171400 | H      | 1.65067600  | -2.30443400 | 2.13377700  |
| H | -1.51573000 | -0.49358000 | -3.21269200 | H      | 0.02826100  | -3.85373900 | 3.70789100  |
| H | 0.16493400  | -0.67713900 | -5.38590700 | H      | -2.52637100 | -3.11578000 | 3.04127900  |
| H | 2.68873100  | -0.48232500 | -4.33384100 | C      | -1.71689000 | 1.48219600  | -1.53605400 |
| C | 1.86017400  | 0.20533200  | 2.12121200  | C      | -2.15632700 | 2.43233800  | -2.46457200 |

|   |             |             |             |        |             |             |             |
|---|-------------|-------------|-------------|--------|-------------|-------------|-------------|
| C | -1.20515300 | 3.15500600  | -3.20775100 | H      | -0.92553700 | 3.43521900  | 3.55936600  |
| C | 0.16171300  | 2.90811000  | -2.99948300 | H      | -1.59341200 | 1.73017700  | 1.87865600  |
| C | 0.54735000  | 1.94353900  | -2.05494800 | H      | 4.59203000  | 1.26911600  | 1.27479200  |
| C | -2.59574200 | 0.65628800  | -0.69011600 | H      | 5.69692000  | -0.29804300 | -0.32050400 |
| C | -3.99511300 | 0.62779500  | -0.63823700 | H      | 4.33663300  | -1.79215300 | -1.78636100 |
| C | -4.61450900 | -0.26438300 | 0.26348700  |        |             |             |             |
| C | -3.85733500 | -1.11357500 | 1.09269100  | [C3]2+ |             |             |             |
| C | -2.46387500 | -1.03258800 | 0.98457100  | Co     | 0.00002500  | 0.00037800  | -0.00001500 |
| H | -3.21600500 | 2.60763800  | -2.60665600 | C      | 0.40356200  | 2.75009800  | 0.61737600  |
| H | -1.52857000 | 3.89479300  | -3.93180300 | C      | 0.83746700  | 3.91264600  | 1.27804600  |
| H | 0.92471400  | 3.44474000  | -3.55056100 | C      | 1.59850500  | 3.79380400  | 2.45222900  |
| H | 1.59301200  | 1.73513400  | -1.87468900 | C      | 1.90580200  | 2.51089800  | 2.93932400  |
| H | -4.59230100 | 1.27152900  | -1.27147100 | C      | 1.44561000  | 1.38950200  | 2.23312500  |
| H | -5.69684300 | -0.29991300 | 0.31983100  | C      | -0.40345100 | 2.75005900  | -0.61752800 |
| H | -4.33618700 | -1.79749200 | 1.78185900  | C      | -0.83733600 | 3.91256400  | -1.27828700 |
| C | -0.57205200 | -2.30933500 | -2.17778000 | C      | -1.59838700 | 3.79364700  | -2.45245400 |
| C | 0.27907500  | -3.10776600 | -2.99318000 | C      | -1.90572000 | 2.51071000  | -2.93944600 |
| C | 1.58355800  | -2.74835700 | -2.66881300 | C      | -1.44554600 | 1.38936000  | -2.23316400 |
| N | 1.50758100  | -1.77420900 | -1.69862500 | H      | 0.58878500  | 4.89278400  | 0.88997800  |
| H | -1.65018400 | -2.29921300 | -2.13976500 | H      | 1.94066400  | 4.68149000  | 2.97396700  |
| H | -0.02745800 | -3.84441000 | -3.71761600 | H      | 2.48783600  | 2.37227300  | 3.84329200  |
| H | 2.52700300  | -3.10795000 | -3.04891500 | H      | 1.66113100  | 0.38977700  | 2.58286800  |
| C | 1.71656500  | 1.47881800  | 1.53952400  | H      | -0.58862800 | 4.89272700  | -0.89029900 |
| C | 2.15577100  | 2.42640700  | 2.47075700  | H      | -1.94052900 | 4.68130000  | -2.97425900 |
| C | 1.20440600  | 3.14682400  | 3.21588700  | H      | -2.48776700 | 2.37202800  | -3.84339700 |
| C | -0.16240200 | 2.90028800  | 3.00682400  | H      | -1.66108700 | 0.38961000  | -2.58282300 |
| C | -0.54780200 | 1.93827500  | 2.05956300  | N      | 0.71285500  | 1.50142600  | 1.09621500  |
| C | 2.59560700  | 0.65513500  | 0.69162200  | N      | -0.71277600 | 1.50136000  | -1.09627100 |
| C | 3.99498800  | 0.62695400  | 0.63982900  | C      | 2.80720800  | -0.95469700 | -0.43901000 |
| C | 4.61457900  | -0.26285700 | -0.26409300 | C      | 4.15797000  | -1.04193600 | -0.83096700 |
| C | 3.85759800  | -1.11012800 | -1.09544300 | C      | 4.61388500  | -0.24216200 | -1.89294000 |
| C | 2.46412800  | -1.02974400 | -0.98712200 | C      | 3.71349200  | 0.62651300  | -2.53698400 |
| H | 3.21540900  | 2.60140100  | 2.61352600  | C      | 2.38274500  | 0.66626900  | -2.08726100 |
| H | 1.52765200  | 3.88460700  | 3.94205600  | C      | 2.22061400  | -1.75593100 | 0.66530600  |

|   |             |             |             |                                       |
|---|-------------|-------------|-------------|---------------------------------------|
| C | 2.91516600  | -2.80107700 | 1.30441900  |                                       |
| C | 2.29584100  | -3.51610400 | 2.34131400  | [C3]3+                                |
| C | 0.98666400  | -3.17134500 | 2.72171600  | Co 0.00003000 0.00020300 0.00005000   |
| C | 0.34308400  | -2.12606500 | 2.04514100  | C -2.25604400 -1.58626000 -0.57014600 |
| H | 4.84668500  | -1.70665100 | -0.32378200 | C -3.06921500 -2.56288800 -1.16420700 |
| H | 5.65112200  | -0.29565000 | -2.20792400 | C -2.57429000 -3.30108600 -2.25200700 |
| H | 4.02704100  | 1.25716600  | -3.36150800 | C -1.27530100 -3.04234000 -2.72212000 |
| H | 1.65476200  | 1.31964700  | -2.55506300 | C -0.50578600 -2.05672500 -2.08885000 |
| H | 3.91993100  | -3.06153600 | 0.99596100  | C -2.65361600 -0.74916000 0.57198200  |
| H | 2.82316500  | -4.32384300 | 2.83839400  | C -3.92332800 -0.76486100 1.16796000  |
| H | 0.47039800  | -3.69380100 | 3.51902400  | C -4.18251300 0.08388100 2.25691000   |
| H | -0.66172200 | -1.82522000 | 2.30918200  | C -3.16209400 0.92925000 2.72542400   |
| N | 1.94184000  | -0.10388300 | -1.06482100 | C -1.91311600 0.90612000 2.08962900   |
| N | 0.94024100  | -1.43349000 | 1.04087200  | H -4.06745900 -2.74995100 -0.78899300 |
| C | -2.80726500 | -0.95460900 | 0.43902300  | H -3.19079600 -4.06020900 -2.72095600 |
| C | -4.15804400 | -1.04176100 | 0.83094600  | H -0.85585500 -3.58520200 -3.56070900 |
| C | -4.61398100 | -0.24181800 | 1.89278100  | H 0.49139700 -1.83116300 -2.43547700  |
| C | -3.71359400 | 0.62693800  | 2.53672500  | H -4.69833900 -1.42155900 0.79347800  |
| C | -2.38283000 | 0.66659600  | 2.08704300  | H -5.15945600 0.08296000 2.72789100   |
| C | -2.22065300 | -1.75602000 | -0.66515700 | H -3.31794100 1.59677100 3.56446000   |
| C | -2.91520800 | -2.80125800 | -1.30411800 | H -1.10887800 1.53861800 2.43418400   |
| C | -2.29587600 | -3.51645400 | -2.34089300 | N -0.98673900 -1.34568600 -1.03760800 |
| C | -0.98669000 | -3.17176700 | -2.72132900 | N -1.66590900 0.08441500 1.03805100   |
| C | -0.34311200 | -2.12638700 | -2.04490300 | C 1.97782400 -1.92247000 0.57025300   |
| H | -4.84675500 | -1.70653900 | 0.32383700  | C 2.62799600 -3.01402500 1.16506600   |
| H | -5.65123000 | -0.29523900 | 2.20773700  | C 2.02262900 -3.66589200 2.25222800   |
| H | -4.02715900 | 1.25772200  | 3.36114200  | C 0.77897100 -3.20807600 2.72033000   |
| H | -1.65485100 | 1.32002800  | 2.55477500  | C 0.17332700 -2.11444400 2.08649600   |
| H | -3.91998000 | -3.06165900 | -0.99563500 | C 2.50246300 -1.15810800 -0.57166100  |
| H | -2.82320100 | -4.32426400 | -2.83785600 | C 3.75417000 -1.37298900 -1.16720500  |
| H | -0.47041700 | -3.69434900 | -3.51855000 | C 4.14392500 -0.57576300 -2.25612400  |
| H | 0.66169900  | -1.82559400 | -2.30898300 | C 3.26870800 0.41855400 -2.72589300   |
| N | -1.94190400 | -0.10372100 | 1.06473600  | C 2.03134600 0.59179500 -2.09069600   |
| N | -0.94027200 | -1.43365100 | -1.04074900 | H 3.58528800 -3.35461200 0.79092000   |

|        |             |             |             |   |             |             |             |
|--------|-------------|-------------|-------------|---|-------------|-------------|-------------|
| H      | 2.51286600  | -4.51156700 | 2.72208500  | C | -4.03932900 | -0.07228700 | -1.21020200 |
| H      | 0.27876000  | -3.67933000 | 3.55792100  | C | -4.73172700 | -0.09253100 | 0.01667800  |
| H      | -0.77746600 | -1.73693700 | 2.43156000  | C | -4.02469000 | -0.08360300 | 1.23230000  |
| H      | 4.41648700  | -2.14278000 | -0.79213800 | C | -1.69766600 | -0.04070000 | 2.35162800  |
| H      | 5.10920800  | -0.72966500 | -2.72604900 | C | 0.57410300  | -0.00273000 | 2.97449900  |
| H      | 3.52746700  | 1.05282600  | -3.56529100 | C | 0.23569500  | -0.00708900 | 4.33850300  |
| H      | 1.33638500  | 1.34271200  | -2.43589900 | C | -1.12165300 | -0.02935100 | 4.70318700  |
| N      | 0.76111700  | -1.48644200 | 1.03650400  | C | -2.10187500 | -0.04620600 | 3.69464700  |
| N      | 1.65804400  | -0.18005300 | -1.03843800 | H | -4.58270200 | -0.07931400 | -2.14747600 |
| C      | -0.24714700 | 2.74594100  | -0.57058300 | H | -5.81605400 | -0.11534900 | 0.02333800  |
| C      | -0.68908800 | 3.93815700  | -1.16345800 | H | -4.55821100 | -0.09984200 | 2.17503000  |
| C      | -1.57691100 | 3.87801400  | -2.25044700 | H | 1.60989400  | 0.01480400  | 2.66018200  |
| C      | -2.00196100 | 2.62338300  | -2.72007000 | H | 1.02138500  | 0.00666400  | 5.08522900  |
| C      | -1.53097000 | 1.46457900  | -2.08780500 | H | -1.41363300 | -0.03314100 | 5.74813100  |
| C      | 0.67881500  | 2.67251600  | 0.57002300  | H | -3.15398800 | -0.06230000 | 3.95377800  |
| C      | 1.30292600  | 3.78030900  | 1.16264600  | C | 0.51999600  | 0.02803300  | -3.01068900 |
| C      | 2.16861200  | 3.58153100  | 2.25091100  | C | -1.10076800 | 0.01577100  | -4.66121600 |
| C      | 2.38885900  | 2.27589700  | 2.72226600  | C | -2.11762800 | -0.01241800 | -3.69088400 |
| C      | 1.74186000  | 1.20546100  | 2.08972900  | C | -1.72690900 | -0.01892200 | -2.34461500 |
| H      | -0.35313100 | 4.89668000  | -0.78873000 | H | 1.56736700  | 0.04471400  | -2.73993200 |
| H      | -1.92757700 | 4.79135200  | -2.71856200 | H | -1.33653800 | 0.02231800  | -5.71986700 |
| H      | -2.68271800 | 2.53101900  | -3.55785000 | H | -3.15842000 | -0.02735100 | -3.98727600 |
| H      | -1.83544400 | 0.48777700  | -2.43245600 | N | -0.39046400 | 0.00074500  | -2.01002600 |
| H      | 1.12263300  | 4.77957300  | 0.78715700  | N | -1.96925900 | -0.03518600 | 0.00291600  |
| H      | 2.65843400  | 4.42842600  | 2.71902000  | N | -0.36639500 | -0.01948700 | 2.00149700  |
| H      | 3.04514300  | 2.07787100  | 3.56128000  | C | 2.56682800  | -1.15138200 | -0.02427900 |
| H      | 1.88777400  | 0.19317500  | 2.43566700  | C | 2.52076800  | 1.22598200  | -0.01316000 |
| N      | -0.67333600 | 1.52624600  | -1.03766900 | C | 3.92900500  | 1.27235500  | -0.02531000 |
| N      | 0.90626700  | 1.40093800  | 1.03811000  | C | 4.65397900  | 0.07144700  | -0.03771600 |
|        |             |             |             | C | 3.97114400  | -1.15725700 | -0.03688700 |
| [Z1]2+ |             |             |             | C | 1.73487800  | -2.37916600 | -0.02073500 |
| Co     | -0.07627000 | -0.00167600 | -0.00358900 | C | -0.43292900 | -3.25117900 | -0.01590000 |
| C      | -2.61819400 | -0.05397500 | 1.19752400  | C | 1.32797700  | -4.74737100 | -0.01315600 |
| C      | -2.63672200 | -0.04317200 | -1.18388300 | C | 2.25082300  | -3.68734600 | -0.01700300 |

|        |             |             |             |   |             |             |             |
|--------|-------------|-------------|-------------|---|-------------|-------------|-------------|
| H      | 4.45168600  | 2.22030300  | -0.02577200 | H | 5.71358200  | -0.02615200 | -0.03516700 |
| H      | 5.73834800  | 0.09070500  | -0.04790000 | H | 4.48765400  | 1.57803600  | 1.42588400  |
| H      | 4.52439000  | -2.08782500 | -0.04671900 | H | -1.71902000 | 1.90938500  | 1.74604000  |
| H      | -1.50184500 | -3.07413500 | -0.01519400 | H | -1.15967600 | 3.69520100  | 3.37493600  |
| H      | 1.66178400  | -5.77951600 | -0.01019600 | H | 1.26540000  | 4.21779400  | 3.84038800  |
| H      | 3.31308900  | -3.89337800 | -0.01622100 | H | 3.03394900  | 2.91450300  | 2.64383800  |
| C      | -0.57565800 | 3.18945800  | 0.01566300  | C | -0.70350700 | -2.17071000 | -1.96192300 |
| C      | -0.15982300 | 4.53288300  | 0.02914800  | C | 0.86074700  | -3.43746800 | -3.10615200 |
| C      | 1.21893500  | 4.81119400  | 0.02825900  | C | 1.91576300  | -2.74527100 | -2.48338200 |
| C      | 2.13592500  | 3.74521200  | 0.01415900  | C | 1.57807800  | -1.73760600 | -1.57429700 |
| C      | 1.64677100  | 2.42568000  | 0.00110400  | H | -1.74131400 | -1.94771800 | -1.75897900 |
| H      | -1.62942700 | 2.93237400  | 0.01602200  | H | 1.05471300  | -4.22934700 | -3.82084400 |
| H      | -0.89721300 | 5.32781000  | 0.03992600  | H | 2.94589700  | -2.99118300 | -2.70626800 |
| H      | 1.57590800  | 5.83593200  | 0.03856000  | N | 0.24976300  | -1.45532700 | -1.31843300 |
| H      | 3.20007000  | 3.94806000  | 0.01411500  | N | 1.88630400  | -0.01204400 | -0.01252900 |
| N      | 0.30476700  | 2.16365500  | 0.00189200  | N | 0.27273600  | 1.44336600  | 1.31299400  |
| N      | 1.87236000  | 0.02503700  | -0.01469200 | C | -2.52961800 | 0.81684500  | -0.89220800 |
| N      | 0.38206600  | -2.17363100 | -0.01996500 | C | -2.53188700 | -0.78988100 | 0.87938600  |
| N      | 0.21733400  | 0.03645300  | -4.32771700 | C | -3.93798000 | -0.80520500 | 0.89533100  |
| N      | -0.01671400 | -4.53962300 | -0.01259600 | C | -4.62950200 | 0.01785200  | -0.01269300 |
|        |             |             |             | C | -3.93029500 | 0.84166100  | -0.92003100 |
| [Z1]3+ |             |             |             | C | -1.58590200 | 1.57717000  | -1.72859100 |
| Co     | -0.00002700 | 0.00034300  | -0.00108900 | C | 0.69371700  | 1.97305600  | -2.16442100 |
| C      | 2.53579300  | 0.87065300  | 0.78772400  | C | -0.87617300 | 3.12056500  | -3.42118300 |
| C      | 2.52553400  | -0.90081100 | -0.81912400 | C | -1.92808400 | 2.49072400  | -2.73067100 |
| C      | 3.92606800  | -0.92977600 | -0.84966800 | H | -4.48054600 | -1.43514900 | 1.58915400  |
| C      | 4.62937600  | -0.02283700 | -0.02891100 | H | -5.71372700 | 0.01941500  | -0.01537500 |
| C      | 3.94195600  | 0.88525900  | 0.79749100  | H | -4.46633100 | 1.47431200  | -1.61667600 |
| C      | 1.60536400  | 1.71450600  | 1.55667200  | H | 1.73249400  | 1.77223200  | -1.94416000 |
| C      | -0.68599200 | 2.14616400  | 1.95821000  | H | -1.07368600 | 3.83917200  | -4.20863000 |
| C      | -0.36168900 | 3.15579300  | 2.87887700  | H | -2.95929700 | 2.71248000  | -2.97301100 |
| C      | 0.98877300  | 3.44253300  | 3.13436600  | C | 0.69574000  | -1.94703000 | 2.15222900  |
| C      | 1.98539100  | 2.71065400  | 2.46250300  | C | 0.37613300  | -2.86304100 | 3.16756400  |
| H      | 4.45890300  | -1.62724600 | -1.48410700 | C | -0.97302600 | -3.12187100 | 3.45745800  |



|        |             |             |             |   |             |             |             |
|--------|-------------|-------------|-------------|---|-------------|-------------|-------------|
| C      | -1.97305000 | -2.45693700 | 2.72388200  | H | 1.41376500  | -0.07231500 | -2.91084600 |
| C      | -1.59763600 | -1.55454700 | 1.72286800  | H | -1.81405000 | -0.46410800 | -5.52484800 |
| H      | 1.72766000  | -1.73251600 | 1.91268400  | N | -0.47426200 | -0.15548100 | -1.99856400 |
| H      | 1.17662800  | -3.35314200 | 3.70870000  | N | -1.96568200 | -0.12626600 | 0.08698400  |
| H      | -1.24606600 | -3.82496400 | 4.23664200  | N | -0.29141700 | 0.08768000  | 2.00917300  |
| H      | -3.02067400 | -2.64058400 | 2.93044900  | C | 2.62125900  | -1.01371700 | -0.05614100 |
| N      | -0.26627500 | -1.30924900 | 1.44712200  | C | 2.45397000  | 1.34646000  | -0.18852600 |
| N      | -1.88638600 | 0.01126100  | -0.00543700 | C | 3.85983700  | 1.45276000  | -0.25428900 |
| N      | -0.25631900 | 1.32223900  | -1.45143900 | C | 4.64343300  | 0.28941200  | -0.21819500 |
| N      | -0.44174400 | -3.15262500 | -2.84730000 | C | 4.02037700  | -0.96867400 | -0.11706200 |
| N      | 0.42758100  | 2.86431300  | -3.13982500 | C | -0.19767400 | -3.32306700 | 0.17929100  |
|        |             |             |             | C | 1.73691300  | -4.56285700 | 0.20096300  |
| [Z2]2+ |             |             |             | H | 4.33520900  | 2.42234900  | -0.33270800 |
| Co     | -0.07664700 | 0.00299500  | -0.00251000 | H | 5.72444300  | 0.36059800  | -0.26801000 |
| C      | -2.56773800 | -0.10285700 | 1.30366900  | H | 4.58742000  | -1.89063900 | -0.08536800 |
| C      | -2.68051300 | -0.24861100 | -1.06303500 | H | -1.27893000 | -3.26984300 | 0.20874600  |
| C      | -4.07644300 | -0.35127200 | -1.04434700 | H | 2.23091000  | -5.52622000 | 0.24832900  |
| C      | -4.72259800 | -0.32529300 | 0.20901300  | C | -0.73963000 | 3.14369900  | -0.18004900 |
| C      | -3.97106100 | -0.20196400 | 1.39142700  | C | -0.39607100 | 4.50551000  | -0.25737300 |
| C      | -1.60595500 | 0.02693700  | 2.41596500  | C | 0.96461700  | 4.85536400  | -0.31449400 |
| C      | 0.68440800  | 0.20917400  | 2.93883400  | C | 1.93751200  | 3.83991000  | -0.29372600 |
| C      | 0.39967100  | 0.27464000  | 4.31373800  | C | 1.52051300  | 2.49899800  | -0.21587700 |
| C      | -0.93928800 | 0.21227000  | 4.73567400  | H | -1.77778400 | 2.83337500  | -0.13461500 |
| C      | -1.95652400 | 0.08653900  | 3.77206700  | H | -1.17494900 | 5.25964500  | -0.27191100 |
| H      | -4.62701900 | -0.44816800 | -1.97219000 | H | 1.26566500  | 5.89618000  | -0.37413900 |
| H      | -5.80301600 | -0.40217700 | 0.26262700  | H | 2.98878800  | 4.09786300  | -0.33696300 |
| H      | -4.46856100 | -0.18437000 | 2.35370400  | N | 0.19433100  | 2.16638200  | -0.15933300 |
| H      | 1.70543900  | 0.25370600  | 2.58189600  | N | 1.86487600  | 0.12092100  | -0.09365200 |
| H      | 1.21232900  | 0.37141000  | 5.02449500  | N | 0.49959000  | -2.16638800 | 0.08451800  |
| H      | -1.18987000 | 0.25997500  | 5.79016700  | N | -0.09023700 | -0.26768900 | -4.35131500 |
| H      | -2.99548100 | 0.03684000  | 4.07623900  | N | 0.37844900  | -4.54828300 | 0.24079400  |
| C      | 0.34788000  | -0.15935500 | -3.07540500 | C | 1.86069300  | -2.27610500 | 0.04999700  |
| C      | -1.43388700 | -0.37357200 | -4.51435800 | N | 2.51805500  | -3.45961600 | 0.10602600  |
| C      | -1.82282100 | -0.26196100 | -2.25751600 | N | -2.33514900 | -0.37257000 | -3.50010200 |

[Z2]3+

Co 0.00000500 -0.00010000 0.00031600  
C 2.53396100 0.85990100 0.81272200  
C 2.53772400 -0.83133900 -0.86790000  
C 3.93391400 -0.84926800 -0.92195000  
C 4.63533700 0.02999300 -0.06628800  
C 3.94293200 0.88944100 0.80623800  
C 1.59889500 1.65381700 1.62739800  
C -0.69751100 2.03010400 2.06391300  
C -0.38082900 2.99825300 3.03108700  
C 0.96669300 3.29286900 3.29116700  
C 1.96993200 2.60989100 2.57794400  
H 4.44548300 -1.52019800 -1.60130900  
H 5.71927800 0.04257800 -0.08169800  
H 4.48627600 1.56012000 1.46032100  
H -1.72856000 1.78859000 1.84748000  
H -1.18319600 3.50014900 3.55831000  
H 1.23678100 4.03696700 4.03227100  
H 3.01658000 2.82055500 2.76251800  
C -0.64278200 -2.13434900 -2.07337700  
C 1.03586400 -3.24908600 -3.18740300  
C 1.59961600 -1.64786000 -1.64931800  
H -1.69649000 -1.97266600 -1.89231500  
H 1.34005700 -3.99266100 -3.91393800  
N 0.26600000 -1.39901000 -1.38487800  
N 1.88836600 0.00716400 -0.01889400  
N 0.26741600 1.37565100 1.37869200  
C -2.53767700 0.83116400 -0.86807600  
C -2.53400400 -0.86002100 0.81260600  
C -3.94297300 -0.88958200 0.80601400  
C -4.63533100 -0.03022800 -0.06663900  
C -3.93386200 0.84901900 -0.92227700  
C 0.64292500 2.13400200 -2.07344100

C -1.03559800 3.24873800 -3.18766300  
H -4.48638600 -1.56012500 1.46018200  
H -5.71927000 -0.04288900 -0.08214400  
H -4.44536600 1.51991200 -1.60172300  
H 1.69662100 1.97214700 -1.89248300  
H -1.33971300 3.99224800 -3.91429800  
C 0.69735200 -2.02943500 2.06482500  
C 0.38058000 -2.99715300 3.03239900  
C -0.96695600 -3.29204100 3.29210400  
C -1.97011100 -2.60965500 2.57819700  
C -1.59898400 -1.65377700 1.62750000  
H 1.72843200 -1.78799800 1.84844000  
H 1.18289200 -3.49855600 3.56017300  
H -1.23712800 -4.03587000 4.03344800  
H -3.01676400 -2.82063400 2.76238000  
N -0.26749500 -1.37545500 1.37903300  
N -1.88835900 -0.00729400 -0.01897700  
N -0.26595200 1.39889900 -1.38482200  
N -0.29343100 -3.06826600 -2.98314800  
N 0.29367600 3.06776400 -2.98342100  
C -1.59953100 1.64772200 -1.64943600  
N -2.01232000 2.56113200 -2.54166200  
N 2.01251000 -2.56139600 -2.54138100

[Z3]2+

Co 0.00006000 -0.00004300 -0.09638300  
C 2.73901300 0.24659800 0.74202700  
C 2.00577200 1.80613900 -0.90761600  
C 3.27409900 2.40024100 -0.95669600  
C 4.29311200 1.89140200 -0.12864700  
C 4.03028800 0.81503100 0.72896600  
C 2.35130100 -0.87734000 1.61272300  
C 0.41925900 -2.20591100 2.29351800  
C 1.16563500 -2.93150500 3.13809600

|   |             |             |             |        |             |             |             |
|---|-------------|-------------|-------------|--------|-------------|-------------|-------------|
| C | 2.65476400  | -2.71312000 | 3.31776300  | H      | -0.67787400 | 3.71282800  | 3.71148200  |
| C | 3.14899400  | -1.58185400 | 2.44353600  | H      | -2.88937500 | 2.49795300  | 4.36857700  |
| H | 3.47193600  | 3.23838100  | -1.61277800 | H      | -4.20518900 | 1.33359000  | 2.49338500  |
| H | 5.28145600  | 2.33800600  | -0.14963000 | C      | 1.45409800  | -1.82828500 | -2.10768700 |
| H | 4.80795900  | 0.43042100  | 1.37655400  | C      | 1.51179000  | -2.87220100 | -3.04574400 |
| H | -0.64249100 | -2.31464500 | 2.12168100  | C      | 0.34474100  | -3.61223700 | -3.30795300 |
| H | 0.67490000  | -3.70898400 | 3.71574400  | C      | -0.84142100 | -3.28996500 | -2.62549200 |
| H | 2.88734900  | -2.49592700 | 4.37156400  | C      | -0.82993800 | -2.23495200 | -1.69751200 |
| H | 4.20363500  | -1.33222300 | 2.49694200  | H      | 2.33094200  | -1.23432200 | -1.88058400 |
| C | -1.45287900 | 1.82720200  | -2.10905500 | H      | 2.44586500  | -3.09156500 | -3.55036300 |
| C | -1.51022300 | 2.87095300  | -3.04731500 | H      | 0.35540600  | -4.42410800 | -4.02780900 |
| C | -0.34316000 | 3.61115300  | -3.30899600 | H      | -1.74829900 | -3.85091700 | -2.81739500 |
| C | 0.84268800  | 3.28918400  | -2.62584500 | N      | 0.31259700  | -1.51697900 | -1.45032400 |
| C | 0.83087800  | 2.23432400  | -1.69770400 | N      | -1.76532000 | -0.74667200 | -0.07322200 |
| H | -2.32974900 | 1.23314400  | -1.88232300 | O      | 0.95773400  | -1.15884900 | 1.48968500  |
| H | -2.44405900 | 3.09008500  | -3.55247400 | O      | -0.95834300 | 1.15900300  | 1.48934300  |
| H | -0.35357200 | 4.42292000  | -4.02897200 | H      | -3.21243800 | 3.63594300  | 3.08060800  |
| H | 1.74957700  | 3.85025700  | -2.81734200 | H      | 3.20973600  | -3.63465900 | 3.08407300  |
| N | -0.31167700 | 1.51621400  | -1.45101200 |        |             |             |             |
| N | 1.76543700  | 0.74656900  | -0.07257500 | [Z3]3+ |             |             |             |
| C | -2.73919100 | -0.24671500 | 0.74103400  | Co     | -0.00004700 | -0.00001900 | 0.06839800  |
| C | -2.00519400 | -1.80655300 | -0.90804300 | C      | -2.68590400 | -0.13081800 | -0.79413700 |
| C | -3.27339700 | -2.40089400 | -0.95729900 | C      | -2.18010500 | 1.54702400  | 0.84428000  |
| C | -4.29269000 | -1.89213300 | -0.12953600 | C      | -3.50560600 | 1.99079100  | 0.85338500  |
| C | -4.03029800 | -0.81554900 | 0.72792700  | C      | -4.43255900 | 1.34291100  | 0.00672000  |
| C | -2.35206000 | 0.87771900  | 1.61135300  | C      | -4.03432600 | 0.28219600  | -0.82138200 |
| C | -0.42083500 | 2.20775400  | 2.29162800  | C      | -2.09081700 | -1.21249100 | -1.58004700 |
| C | -1.16791200 | 2.93408400  | 3.13495000  | C      | 0.09473500  | -2.25337400 | -2.08166500 |
| C | -2.65690200 | 2.71485300  | 3.31468100  | C      | -0.49315900 | -3.12918000 | -2.90311100 |
| C | -3.15043800 | 1.58295600  | 2.44087600  | C      | -1.98154400 | -3.16929700 | -3.16297800 |
| H | -3.47092100 | -3.23923300 | -1.61322200 | C      | -2.70213000 | -2.08588300 | -2.40251300 |
| H | -5.28091400 | -2.33901200 | -0.15058800 | H      | -3.81958800 | 2.80816300  | 1.49032000  |
| H | -4.80814900 | -0.43109600 | 1.37539100  | H      | -5.46609800 | 1.67104400  | -0.00458600 |
| H | 0.64089000  | 2.31691400  | 2.11990000  | H      | -4.74895400 | -0.20598800 | -1.47219300 |

|   |             |             |             |        |             |             |             |
|---|-------------|-------------|-------------|--------|-------------|-------------|-------------|
| H | 1.15001700  | -2.17777700 | -1.87315500 | C      | -0.06371500 | -3.47755600 | 3.24572500  |
| H | 0.14662400  | -3.84322700 | -3.41252600 | C      | 1.10225000  | -3.10375400 | 2.55388200  |
| H | -2.18577800 | -3.06169900 | -4.23848000 | C      | 1.04491300  | -2.05014700 | 1.63517200  |
| H | -3.77772600 | -2.00878700 | -2.52857000 | H      | -2.17429400 | -1.18550100 | 1.86575100  |
| C | 1.26620000  | 1.73671000  | 2.06987700  | H      | -2.17983600 | -3.03931300 | 3.51506200  |
| C | 1.25886000  | 2.78559100  | 3.00082200  | H      | -0.03416400 | -4.29267100 | 3.96044700  |
| C | 0.06156600  | 3.47887500  | 3.24429700  | H      | 2.03628600  | -3.62410200 | 2.72793200  |
| C | -1.10399000 | 3.10464800  | 2.55199500  | N      | -0.14287500 | -1.38366100 | 1.40274500  |
| C | -1.04603900 | 2.05067300  | 1.63374300  | N      | 1.81709700  | -0.51321800 | 0.03012700  |
| H | 2.17314600  | 1.18645700  | 1.86645300  | O      | -0.65723400 | -1.25207900 | -1.36309200 |
| H | 2.17758700  | 3.04098300  | 3.51494900  | O      | 0.65820500  | 1.25183600  | -1.36281600 |
| H | 0.03154100  | 4.29428200  | 3.95866400  | H      | 2.39734300  | 4.15032400  | -2.88851700 |
| H | -2.03817500 | 3.62496600  | 2.72533800  | H      | -2.39480700 | -4.15139700 | -2.88860000 |
| N | 0.14195900  | 1.38424800  | 1.40219900  |        |             |             |             |
| N | -1.81716500 | 0.51311500  | 0.02877700  | [Z4]2+ |             |             |             |
| C | 2.68635300  | 0.13028300  | -0.79258400 | Co     | 0.07938800  | -0.10105800 | -0.11006800 |
| C | 2.17946000  | -1.54694000 | 0.84612200  | N      | 0.55478400  | -0.11902400 | 1.84841400  |
| C | 3.50487200  | -1.99095400 | 0.85599700  | N      | -0.48668700 | 2.03363400  | -0.00745700 |
| C | 4.43234400  | -1.34354600 | 0.00954000  | N      | 1.97455000  | 0.03501700  | -0.27845000 |
| C | 4.03470000  | -0.28302300 | -0.81909400 | N      | -1.87385400 | -0.23337700 | 0.04033200  |
| C | 2.09187000  | 1.21185700  | -1.57908500 | N      | -0.14580700 | -2.30869300 | -0.12119100 |
| C | -0.09315700 | 2.25336100  | -2.08171100 | N      | 0.15970100  | -0.04595100 | -2.09469200 |
| C | 0.49533500  | 3.12879700  | -2.90312300 | C      | -0.64221500 | -0.07778600 | -3.12754900 |
| C | 1.98381000  | 3.16825700  | -3.16258900 | C      | 1.55433900  | 0.08800100  | -3.94013900 |
| C | 2.70378900  | 2.08490200  | -2.40146900 | H      | -1.71805400 | -0.15242800 | -3.03387200 |
| H | 3.81839700  | -2.80818400 | 1.49334200  | H      | 2.41831500  | 0.15931100  | -4.58649700 |
| H | 5.46581900  | -1.67189900 | -0.00118800 | C      | 1.90853400  | -0.03779200 | 2.08378400  |
| H | 4.74971200  | 0.20478800  | -1.46976200 | C      | 2.42522700  | -0.04193600 | 3.38910200  |
| H | -1.14852600 | 2.17822800  | -1.87344400 | C      | 1.53731500  | -0.12901300 | 4.47586300  |
| H | -0.14399900 | 3.84306100  | -3.41279900 | C      | 0.15538000  | -0.21000900 | 4.22684400  |
| H | 2.18830900  | 3.06012800  | -4.23799100 | C      | -0.29721900 | -0.20259300 | 2.89712100  |
| H | 3.77943600  | 2.00755400  | -2.52693600 | C      | 2.72567800  | 0.04896200  | 0.85651000  |
| C | -1.26751800 | -1.73573900 | 2.06994700  | C      | 4.12536400  | 0.13706800  | 0.77468100  |
| C | -1.26080000 | -2.78423300 | 3.00133100  | C      | 4.72418300  | 0.20614800  | -0.49926100 |

|   |             |             |             |        |             |             |             |
|---|-------------|-------------|-------------|--------|-------------|-------------|-------------|
| C | 3.93168100  | 0.18569500  | -1.66120500 | C      | -1.56363100 | -2.60778300 | -0.03118200 |
| C | 2.53508500  | 0.09752300  | -1.51908100 | C      | -0.43178200 | -4.63081800 | -0.13686100 |
| H | 3.49406800  | 0.02079500  | 3.55813400  | H      | -0.33379700 | -5.26215000 | -1.03269300 |
| H | 1.91732000  | -0.13336900 | 5.49223000  | H      | -0.21813100 | -5.28687500 | 0.72036900  |
| H | -0.56179500 | -0.27825200 | 5.03704500  |        |             |             |             |
| H | -1.35359600 | -0.26408800 | 2.66798300  | [Z4]3+ |             |             |             |
| H | 4.73679700  | 0.15214100  | 1.66870500  | Co     | -0.00000700 | -0.13225400 | -0.00007500 |
| H | 5.80377600  | 0.27455100  | -0.58318900 | N      | -0.45682900 | 1.24905200  | -1.32705400 |
| H | 4.38236000  | 0.23634500  | -2.64574800 | N      | 0.45679400  | 1.24838000  | 1.32761400  |
| C | 0.50103800  | -3.44364000 | -0.18116700 | N      | -1.88082700 | -0.16119100 | 0.25477100  |
| C | -1.77870300 | -3.95472800 | -0.03759900 | N      | 1.88081200  | -0.16102600 | -0.25496200 |
| H | 1.58097600  | -3.49564100 | -0.25406800 | N      | 0.02779400  | -1.49274200 | -1.38363800 |
| H | -2.72375300 | -4.47776600 | 0.01778800  | N      | -0.02777400 | -1.49334900 | 1.38288500  |
| C | -1.84214700 | 2.18092400  | 0.08245300  | C      | 0.82810700  | -2.23220400 | 2.03884700  |
| C | -2.43496900 | 3.45699800  | 0.14884700  | C      | -1.33316800 | -2.75905900 | 2.80269900  |
| C | -1.60994600 | 4.59492100  | 0.12296400  | H      | 1.89796000  | -2.19009600 | 1.88227600  |
| C | -0.21508900 | 4.43308200  | 0.03180500  | H      | -2.16266800 | -3.19924300 | 3.33818500  |
| C | 0.30609600  | 3.12868100  | -0.03175000 | C      | -1.81189800 | 1.48950200  | -1.42425200 |
| C | -2.61671800 | 0.91296800  | 0.10346100  | C      | -2.31119200 | 2.44276600  | -2.32023600 |
| C | -4.01951200 | 0.84937500  | 0.18084700  | C      | -1.41189700 | 3.15903400  | -3.13054900 |
| C | -4.64900000 | -0.40857500 | 0.19163000  | C      | -0.03472200 | 2.90306200  | -3.02135500 |
| C | -3.87593500 | -1.57654400 | 0.12451600  | C      | 0.41002200  | 1.93718700  | -2.10518500 |
| C | -2.47385100 | -1.46154000 | 0.04763100  | C      | -2.63396700 | 0.66757800  | -0.51767900 |
| H | -3.50979600 | 3.57205700  | 0.21907000  | C      | -4.03005800 | 0.65735700  | -0.38447100 |
| H | -2.04888700 | 5.58624800  | 0.17323600  | C      | -4.60834500 | -0.22058200 | 0.55635800  |
| H | 0.45292100  | 5.28703400  | 0.00969900  | C      | -3.80695600 | -1.07045800 | 1.34058700  |
| H | 1.37489700  | 2.95643100  | -0.10338700 | C      | -2.41285300 | -1.02383100 | 1.16526400  |
| H | -4.61522500 | 1.75192000  | 0.23107000  | H      | -3.37697400 | 2.62543400  | -2.38680200 |
| H | -5.73048800 | -0.47321300 | 0.25073400  | H      | -1.78163800 | 3.90074600  | -3.83020800 |
| H | -4.34313400 | -2.55438300 | 0.12988300  | H      | 0.69004800  | 3.43361600  | -3.62731800 |
| C | 1.53134600  | 0.05670500  | -2.58083200 | H      | 1.46389500  | 1.71932200  | -1.99946000 |
| C | 0.12434000  | 0.00231700  | -4.42345800 | H      | -4.65437800 | 1.30523300  | -0.98713800 |
| H | -0.17732800 | 0.87545700  | -5.02136300 | H      | -5.68631500 | -0.24164200 | 0.67468700  |
| H | -0.05903500 | -0.87644700 | -5.05982200 | H      | -4.24941800 | -1.74724500 | 2.06167900  |

|        |             |             |             |   |             |             |             |
|--------|-------------|-------------|-------------|---|-------------|-------------|-------------|
| C      | -0.82806800 | -2.23134700 | -2.03991100 | N | 1.97020200  | -0.03227500 | -0.23934200 |
| C      | 1.33320000  | -2.75761100 | -2.80419200 | N | -1.87909600 | -0.17205000 | -0.03383600 |
| H      | -1.89791400 | -2.18941300 | -1.88323300 | N | -0.29701500 | -2.29545900 | -0.33443900 |
| H      | 2.16270500  | -3.19745200 | -3.33995100 | N | 0.25437700  | 0.11704600  | -2.11328800 |
| C      | 1.81186800  | 1.48872600  | 1.42498900  | C | -0.40947800 | 0.22970400  | -3.27138000 |
| C      | 2.31118700  | 2.44131900  | 2.32167300  | C | 1.67046700  | 0.34235600  | -3.85087300 |
| C      | 1.41191400  | 3.15699300  | 3.13253400  | N | 1.60531700  | 0.19038300  | -2.48942300 |
| C      | 0.03473300  | 2.90112900  | 3.02315500  | H | -1.48479600 | 0.21270400  | -3.33527000 |
| C      | -0.41004100 | 1.93595900  | 2.10625800  | H | 2.58816100  | 0.42806400  | -4.40897400 |
| C      | 2.63394000  | 0.66734100  | 0.51792600  | C | 1.86100100  | -0.30948200 | 2.10347700  |
| C      | 4.03003400  | 0.65720400  | 0.38472100  | C | 2.35298100  | -0.45128200 | 3.40927700  |
| C      | 4.60833200  | -0.22018500 | -0.55661400 | C | 1.44102600  | -0.58940800 | 4.47130200  |
| C      | 3.80695100  | -1.06964100 | -1.34130700 | C | 0.06268700  | -0.58134400 | 4.19604200  |
| C      | 2.41285100  | -1.02316700 | -1.16591600 | C | -0.36568700 | -0.43712400 | 2.86544000  |
| H      | 3.37697600  | 2.62391100  | 2.38836500  | C | 2.70439500  | -0.15744800 | 0.90143200  |
| H      | 1.78167400  | 3.89815800  | 3.83276200  | C | 4.10666700  | -0.13591800 | 0.83301400  |
| H      | -0.69002100 | 3.43124000  | 3.62952800  | C | 4.72079300  | 0.00892600  | -0.42622200 |
| H      | -1.46392600 | 1.71822100  | 2.00036700  | C | 3.94821500  | 0.12640500  | -1.59788400 |
| H      | 4.65435400  | 1.30471700  | 0.98778100  | C | 2.55824900  | 0.09759100  | -1.44657100 |
| H      | 5.68630000  | -0.24115100 | -0.67496800 | H | 3.42012200  | -0.45564200 | 3.59876400  |
| H      | 4.24941400  | -1.74600900 | -2.06279400 | H | 1.80108700  | -0.70070600 | 5.48864100  |
| C      | -1.37951700 | -1.80135000 | 1.84016300  | H | -0.67214200 | -0.68515400 | 4.98614000  |
| C      | 0.11610600  | -3.12399000 | 3.01737800  | H | -1.42012300 | -0.42889300 | 2.62031400  |
| H      | 0.45516600  | -2.94224200 | 4.04857500  | H | 4.70984300  | -0.23032300 | 1.72717300  |
| H      | 0.32444900  | -4.18640600 | 2.81961200  | H | 5.80270000  | 0.02707500  | -0.49866300 |
| C      | 1.37953000  | -1.80040100 | -1.84116200 | H | 4.41661000  | 0.23016700  | -2.56880400 |
| C      | -0.11605800 | -3.12255200 | -3.01896300 | C | 0.18439700  | -3.53821300 | -0.45741300 |
| H      | -0.32429700 | -4.18509200 | -2.82176800 | C | -1.95122000 | -3.83094000 | -0.38482200 |
| H      | -0.45521000 | -2.94026900 | -4.05003700 | N | -1.68391100 | -2.48481700 | -0.28811200 |
| [Z5]2+ |             |             |             | H | 1.23936200  | -3.74871100 | -0.52175600 |
| Co     | 0.07447900  | -0.08389500 | -0.11161700 | H | -2.93903300 | -4.25970200 | -0.37156300 |
| N      | 0.50870600  | -0.30566700 | 1.84104700  | C | -1.76198600 | 2.22379800  | 0.20515900  |
| N      | -0.41069900 | 2.02527100  | 0.13779600  | C | -2.30524100 | 3.51160600  | 0.36828600  |
|        |             |             |             | C | -1.43410800 | 4.61114200  | 0.46458000  |

|        |             |             |             |   |             |             |             |
|--------|-------------|-------------|-------------|---|-------------|-------------|-------------|
| C      | -0.04571800 | 4.39759000  | 0.39634200  | C | -0.56082800 | 1.21012500  | 2.54427500  |
| C      | 0.42604100  | 3.08306500  | 0.23174400  | C | 2.59209100  | 0.40050500  | 0.87056300  |
| C      | -2.58528800 | 0.99451600  | 0.09318600  | C | 3.99299900  | 0.38229100  | 0.82531000  |
| C      | -3.99020900 | 0.97148700  | 0.10754700  | C | 4.62206000  | -0.18892400 | -0.29950400 |
| C      | -4.65738300 | -0.25949200 | -0.01549900 | C | 3.87238800  | -0.73650100 | -1.36063700 |
| C      | -3.92590300 | -1.44963500 | -0.15237700 | C | 2.48167300  | -0.68319400 | -1.24388700 |
| C      | -2.52781500 | -1.35322000 | -0.15485200 | H | 3.19906200  | 1.66041700  | 3.30066900  |
| H      | -3.37615600 | 3.66542800  | 0.42159300  | H | 1.50241900  | 2.47884800  | 4.94690400  |
| H      | -1.83391700 | 5.61198800  | 0.59091400  | H | -0.94810800 | 2.17621300  | 4.42761800  |
| H      | 0.65717000  | 5.22010300  | 0.46745400  | H | -1.60538200 | 1.07142200  | 2.30253300  |
| H      | 1.48900000  | 2.87580800  | 0.17524900  | H | 4.58330200  | 0.79494000  | 1.63353800  |
| H      | -4.55962100 | 1.88600500  | 0.20916800  | H | 5.70474100  | -0.21150500 | -0.35218300 |
| H      | -5.74132400 | -0.29268800 | -0.00886100 | H | 4.36024900  | -1.17736200 | -2.22069600 |
| H      | -4.43104900 | -2.40171000 | -0.25652000 | C | 0.51668800  | -2.89564000 | 1.38209000  |
| N      | 0.42892700  | 0.36988800  | -4.36440600 | C | -1.55771800 | -3.42956800 | 1.69665800  |
| N      | -0.80225600 | -4.51470800 | -0.49241900 | N | -1.52225600 | -2.21393300 | 1.06823600  |
|        |             |             |             | H | 1.59290800  | -2.94641300 | 1.38827500  |
| [Z5]3+ |             |             |             | H | -2.46407100 | -3.94003800 | 1.97817800  |
| Co     | 0.00020900  | -0.12933200 | -0.04186700 | C | -1.70866500 | 1.87547200  | -1.01924700 |
| N      | 0.36085000  | 0.76588100  | 1.65973800  | C | -2.14226600 | 3.06355300  | -1.61644900 |
| N      | -0.36129400 | 1.59308100  | -0.89677400 | C | -1.18645800 | 3.97915200  | -2.09406100 |
| N      | 1.88728400  | -0.12980100 | -0.16610000 | C | 0.17882100  | 3.68058200  | -1.95847500 |
| N      | -1.88688500 | -0.20359300 | 0.05822900  | C | 0.55970500  | 2.47292800  | -1.35188400 |
| N      | -0.17404000 | -1.86867300 | 0.86377900  | C | -2.59218600 | 0.83245700  | -0.47256500 |
| N      | 0.17494500  | -1.00812600 | -1.79459000 | C | -3.99307600 | 0.79148000  | -0.44465800 |
| C      | -0.51555400 | -1.53656200 | -2.81648600 | C | -4.62168100 | -0.32976300 | 0.13404100  |
| C      | 1.55900500  | -1.78387700 | -3.38417100 | C | -3.87150700 | -1.39474300 | 0.67333900  |
| N      | 1.52327600  | -1.16877800 | -2.16174300 | C | -2.48087100 | -1.28303500 | 0.60883600  |
| H      | -1.59178100 | -1.57347000 | -2.85204300 | H | -3.20100500 | 3.27439400  | -1.70788300 |
| H      | 2.46541500  | -2.03178800 | -3.91165100 | H | -1.50571900 | 4.90493800  | -2.55977700 |
| C      | 1.70794900  | 0.92580900  | 1.92397900  | H | 0.94535300  | 4.36001500  | -2.31125600 |
| C      | 2.14054300  | 1.54044100  | 3.10351000  | H | 1.60453900  | 2.22084100  | -1.23537800 |
| C      | 1.18397500  | 2.00043100  | 4.02733600  | H | -4.58372800 | 1.59938800  | -0.85743700 |
| C      | -0.18101600 | 1.83418000  | 3.74333900  | H | -5.70433100 | -0.37878300 | 0.16473000  |

|        |             |             |             |        |             |             |             |
|--------|-------------|-------------|-------------|--------|-------------|-------------|-------------|
| H      | -4.35885400 | -2.25549000 | 1.11340700  | C      | 2.20809300  | 2.57671400  | -2.44976700 |
| N      | 0.30603100  | -2.02226100 | -3.81035300 | H      | 4.49090300  | -1.67062900 | 1.65373800  |
| N      | -0.30463600 | -3.87239500 | 1.90177400  | H      | 5.77624700  | -0.16762600 | 0.12233700  |
|        |             |             |             | H      | 4.56021300  | 1.41129700  | -1.37587200 |
| [Z6]2+ |             |             |             | H      | -1.54595000 | 2.11457000  | -1.71097400 |
| Co     | -0.00000100 | 0.00000500  | 0.07901100  | H      | -0.83528400 | 3.81759200  | -3.39841500 |
| C      | -2.60419100 | -0.75697900 | -0.70523000 | H      | 1.62736200  | 4.10107900  | -3.87250700 |
| C      | -2.56716100 | 0.94189100  | 0.96612100  | H      | 3.26912200  | 2.68344300  | -2.64102300 |
| C      | -3.97670500 | 0.99175400  | 0.98371000  | N      | 1.91663600  | -0.08863900 | 0.12049400  |
| C      | -4.69169600 | 0.14445500  | 0.12548900  | N      | 0.39380300  | 1.49783300  | -1.26638800 |
| C      | -4.00679900 | -0.74621800 | -0.72509400 | C      | -1.71732700 | 1.75018800  | 1.82203500  |
| C      | -1.73673600 | -1.64428800 | -1.51113000 | C      | -1.88910100 | 2.73833900  | 2.76667100  |
| C      | 0.49727600  | -2.26589600 | -1.93599600 | C      | -0.57744800 | 3.10327400  | 3.25190400  |
| C      | 0.09155300  | -3.21971300 | -2.88418000 | H      | -2.82795300 | 3.16639500  | 3.08537000  |
| C      | -1.28172700 | -3.37474900 | -3.14429200 | C      | 0.34261300  | 2.32761900  | 2.58915400  |
| C      | -2.20803700 | -2.57665300 | -2.44987500 | H      | -0.35589100 | 3.84948100  | 3.99992000  |
| H      | -4.49094300 | 1.67059500  | 1.65367800  | H      | 1.41675400  | 2.24024700  | 2.61295600  |
| H      | -5.77625400 | 0.16757200  | 0.12226800  | C      | 1.71728500  | -1.75021500 | 1.82204400  |
| H      | -4.56018400 | -1.41131200 | -1.37595500 | C      | 1.88904600  | -2.73835900 | 2.76669000  |
| H      | 1.54598800  | -2.11454600 | -1.71096200 | C      | 0.57737400  | -3.10340100 | 3.25179300  |
| H      | 0.83536400  | -3.81749800 | -3.39849300 | H      | 2.82789200  | -3.16642100 | 3.08539800  |
| H      | -1.62727000 | -4.10095000 | -3.87267300 | C      | -0.34266400 | -2.32762100 | 2.58915700  |
| H      | -3.26905900 | -2.68336000 | -2.64118000 | H      | 0.35579800  | -3.84969100 | 3.99972100  |
| N      | -1.91664100 | 0.08863400  | 0.12046200  | H      | -1.41680300 | -2.24022900 | 2.61296500  |
| N      | -0.39377600 | -1.49782400 | -1.26640500 | O      | -0.33235700 | 1.47831000  | 1.69777800  |
| C      | 2.60420500  | 0.75697400  | -0.70518100 | O      | 0.33232100  | -1.47830300 | 1.69780300  |
| C      | 2.56713600  | -0.94191400 | 0.96614900  |        |             |             |             |
| C      | 3.97667900  | -0.99178600 | 0.98376100  | [Z6]3+ |             |             |             |
| C      | 4.69168900  | -0.14450400 | 0.12553900  | Co     | 0.00000000  | -0.00000200 | -0.10135800 |
| C      | 4.00681300  | 0.74620500  | -0.72502200 | C      | -2.60562100 | 0.63663700  | 0.66509900  |
| C      | 1.73676800  | 1.64430400  | -1.51107900 | C      | -2.46176400 | -1.06142500 | -1.02284300 |
| C      | -0.49723300 | 2.26592400  | -1.93597900 | C      | -3.86659600 | -1.16212200 | -1.07093300 |
| C      | -0.09148600 | 3.21978200  | -2.88411200 | C      | -4.62641000 | -0.33678400 | -0.22585600 |
| C      | 1.28180100  | 3.37483900  | -3.14417400 | C      | -4.00329400 | 0.57798900  | 0.65206600  |



|   |             |             |             |        |             |             |             |
|---|-------------|-------------|-------------|--------|-------------|-------------|-------------|
| C | -1.73513700 | 1.50015100  | 1.47786700  | C      | -1.47998400 | -2.78436500 | -2.77133100 |
| C | 0.53343200  | 2.05475900  | 1.91719900  | C      | -0.09503500 | -3.03471000 | -3.11174700 |
| C | 0.14081300  | 3.00851700  | 2.86774400  | H      | -2.33820800 | -3.28076200 | -3.19967100 |
| C | -1.22691600 | 3.20237400  | 3.12202700  | C      | 0.69174400  | -2.20942400 | -2.35739100 |
| C | -2.17447900 | 2.43739600  | 2.41836500  | H      | 0.26245300  | -3.74926500 | -3.83753100 |
| H | -4.34490100 | -1.86015600 | -1.74697800 | H      | 1.75265600  | -2.04323300 | -2.27201900 |
| H | -5.70873500 | -0.40067000 | -0.24936400 | C      | 1.50481000  | 1.80678700  | -1.81122800 |
| H | -4.59680800 | 1.21487200  | 1.29577100  | C      | 1.47996500  | 2.78429400  | -2.77141000 |
| H | 1.57942700  | 1.88337800  | 1.70775200  | C      | 0.09501300  | 3.03461600  | -3.11183500 |
| H | 0.90130500  | 3.57662200  | 3.38961500  | H      | 2.33818400  | 3.28069100  | -3.19975900 |
| H | -1.55364100 | 3.93269000  | 3.85403000  | C      | -0.69175800 | 2.20934000  | -2.35745900 |
| H | -3.23434400 | 2.56985800  | 2.59914200  | H      | -0.26248100 | 3.74914800  | -3.83763800 |
| N | -1.88691800 | -0.17690100 | -0.15938000 | H      | -1.75266900 | 2.04314000  | -2.27208600 |
| N | -0.38447000 | 1.32409500  | 1.24046300  | O      | -0.14823700 | -1.42052400 | -1.52927300 |
| C | 2.60562500  | -0.63661200 | 0.66510800  | O      | 0.14823000  | 1.42047400  | -1.52931700 |
| C | 2.46175900  | 1.06139800  | -1.02288700 |        |             |             |             |
| C | 3.86659100  | 1.16209000  | -1.07099000 | [Z7]2+ |             |             |             |
| C | 4.62640900  | 0.33677600  | -0.22589400 | Co     | 0.16533500  | -0.47705700 | 0.04115100  |
| C | 4.00329800  | -0.57796800 | 0.65206200  | C      | 2.12072200  | -0.35453500 | -2.08291500 |
| C | 1.73514500  | -1.50010100 | 1.47790700  | C      | 0.06129800  | 0.71502400  | -2.59248600 |
| C | -0.53342100 | -2.05470600 | 1.91725900  | C      | 0.51739100  | 1.06981300  | -3.87364100 |
| C | -0.14079500 | -3.00843900 | 2.86782800  | C      | 1.81735200  | 0.69175800  | -4.25154800 |
| C | 1.22693500  | -3.20228300 | 3.12211500  | C      | 2.62804000  | -0.02368100 | -3.35556900 |
| C | 2.17449300  | -2.43731700 | 2.41843200  | C      | 2.87870800  | -1.10349200 | -1.04865800 |
| H | 4.34489200  | 1.86010100  | -1.74706100 | C      | 2.80186300  | -2.00671200 | 1.11904200  |
| H | 5.70873400  | 0.40065700  | -0.24941400 | C      | 4.12199500  | -2.48119800 | 1.01648400  |
| H | 4.59681700  | -1.21483000 | 1.29578300  | C      | 4.83056300  | -2.24583300 | -0.17563000 |
| H | -1.57941700 | -1.88333200 | 1.70781500  | C      | 4.20292100  | -1.54828900 | -1.22280900 |
| H | -0.90128400 | -3.57653500 | 3.38971400  | H      | -0.11340200 | 1.62010600  | -4.56214000 |
| H | 1.55366500  | -3.93257900 | 3.85413400  | H      | 2.19360300  | 0.95236600  | -5.23505400 |
| H | 3.23435800  | -2.56976300 | 2.59921600  | H      | 3.62909700  | -0.31499900 | -3.64646400 |
| N | 1.88691800  | 0.17690000  | -0.15939400 | H      | 2.22043100  | -2.16630400 | 2.02087600  |
| N | 0.38447700  | -1.32405800 | 1.24050100  | H      | 4.57239300  | -3.01514000 | 1.84592100  |
| C | -1.50482100 | -1.80683500 | -1.81117200 | H      | 5.85134100  | -2.59610300 | -0.29017300 |

|   |             |             |             |        |             |             |             |
|---|-------------|-------------|-------------|--------|-------------|-------------|-------------|
| H | 4.74139200  | -1.36019400 | -2.14399000 | C      | -2.90850100 | 1.07766000  | -0.59638800 |
| N | 0.85728300  | 0.01548200  | -1.72778700 | C      | -3.34513000 | 1.79296100  | -1.75582700 |
| N | 2.19711700  | -1.33588500 | 0.11323400  | C      | -4.62030500 | 2.37920600  | -1.84163000 |
| C | -0.33651100 | -0.13616300 | 2.81047100  | C      | -5.45661800 | 2.22967900  | -0.72490200 |
| C | -1.15721700 | -2.16596900 | 1.87928200  | C      | -5.03424800 | 1.51960000  | 0.43703100  |
| C | -1.66957500 | -2.55901500 | 3.13017800  | C      | -3.76238800 | 0.93722800  | 0.51769400  |
| C | -1.49902800 | -1.69949000 | 4.23115600  | C      | -1.25851300 | 1.02877800  | -2.04590300 |
| C | -0.82711400 | -0.46984400 | 4.08187500  | H      | -4.94441700 | 2.92009100  | -2.72504500 |
| H | -2.18649800 | -3.50343300 | 3.24925000  | H      | -6.45201200 | 2.66483800  | -0.74376900 |
| H | -1.88858200 | -1.98504500 | 5.20247100  | H      | -5.71772200 | 1.43067300  | 1.27680100  |
| H | -0.69624500 | 0.19538600  | 4.92764900  | H      | -3.44367700 | 0.39777800  | 1.40387900  |
| C | -0.64870200 | -2.84902000 | -1.67391800 | H      | -2.25521600 | 2.16038400  | -3.57339500 |
| C | -1.24966000 | -4.09930200 | -1.89764400 | N      | -1.60365300 | 0.61642100  | -0.81440200 |
| C | -1.86117800 | -4.76378600 | -0.82020100 | N      | -2.27373600 | 1.74098600  | -2.65234000 |
| C | -1.85297400 | -4.15936200 | 0.44948700  | H      | 3.08989200  | 5.86086200  | 1.41450900  |
| C | -1.23460500 | -2.90956900 | 0.60615500  | H      | 3.06366200  | 4.76609400  | -0.81051100 |
| H | -0.17092600 | -2.31189300 | -2.48303000 |        |             |             |             |
| H | -1.23395000 | -4.53057500 | -2.89211100 | [Z7]3+ |             |             |             |
| H | -2.33428900 | -5.72983400 | -0.96232800 | Co     | 0.00000000  | 0.46168600  | 0.00000000  |
| H | -2.31916900 | -4.65273400 | 1.29448800  | C      | -2.06150000 | 1.32903900  | -1.69223300 |
| N | -0.63877400 | -2.26345200 | -0.45370500 | C      | -0.65048300 | -0.36955900 | -2.60960500 |
| N | -0.50990400 | -0.97940400 | 1.75314500  | C      | -1.37001500 | -0.37605500 | -3.81264800 |
| C | 1.43388600  | 3.02797200  | 2.23190700  | C      | -2.46273700 | 0.50813100  | -3.93248700 |
| C | 1.41118100  | 2.38501000  | 0.95441500  | C      | -2.82021500 | 1.36814000  | -2.87587500 |
| C | 2.00228100  | 3.00835900  | -0.16363700 | C      | -2.23667600 | 2.12298800  | -0.46373600 |
| C | 2.59986600  | 4.26004000  | 0.03136600  | C      | -1.36049300 | 2.50399200  | 1.69871100  |
| C | 2.61515600  | 4.88943500  | 1.30959700  | C      | -2.34458300 | 3.47191800  | 1.95742600  |
| C | 2.03213000  | 4.28391300  | 2.43235000  | C      | -3.29571400 | 3.76290600  | 0.96627700  |
| C | 0.38336300  | 1.05988500  | 2.38907600  | C      | -3.24003100 | 3.07719500  | -0.26095500 |
| H | 1.99634500  | 2.53867600  | -1.13996900 | H      | -1.09918200 | -1.03647100 | -4.62763900 |
| H | 2.04250000  | 4.76236300  | 3.40637000  | H      | -3.03690200 | 0.52497400  | -4.85215500 |
| H | 0.62084000  | 2.31540200  | 4.09802100  | H      | -3.66067200 | 2.04319800  | -2.97842800 |
| N | 0.77522900  | 2.15884200  | 3.10912200  | H      | -0.61763700 | 2.26247100  | 2.44575500  |
| N | 0.74670000  | 1.15778400  | 1.09146600  | H      | -2.35284100 | 3.97617200  | 2.91636900  |

|   |             |             |             |        |             |             |             |
|---|-------------|-------------|-------------|--------|-------------|-------------|-------------|
| H | -4.06656600 | 4.50559700  | 1.14048800  | N      | -1.01851200 | -0.91291700 | 0.96451000  |
| H | -3.96487000 | 3.28315900  | -1.03942900 | C      | 2.11193100  | -1.77586700 | -0.79539400 |
| N | -1.01438300 | 0.47282600  | -1.60249400 | C      | 2.23712800  | -2.54747900 | -1.99309800 |
| N | -1.30666500 | 1.84680500  | 0.51801000  | C      | 3.23753000  | -3.51895200 | -2.16522200 |
| C | 0.65048100  | -0.36955600 | 2.60960500  | C      | 4.12367000  | -3.70311300 | -1.09634900 |
| C | 2.06150200  | 1.32903800  | 1.69223200  | C      | 4.01149600  | -2.94039400 | 0.10187700  |
| C | 2.82021600  | 1.36814000  | 2.87587400  | C      | 3.01388300  | -1.97386700 | 0.26994700  |
| C | 2.46273600  | 0.50813300  | 3.93248700  | C      | 0.50827100  | -1.14966200 | -2.19945700 |
| C | 1.37001300  | -0.37605100 | 3.81265000  | H      | 3.31821700  | -4.09644300 | -3.07986300 |
| H | 3.66067400  | 2.04319700  | 2.97842600  | H      | 4.91482800  | -4.44205700 | -1.18018800 |
| H | 3.03690200  | 0.52497600  | 4.85215600  | H      | 4.72058000  | -3.11493100 | 0.90545500  |
| H | 1.09917900  | -1.03646600 | 4.62764100  | H      | 2.95166000  | -1.40549000 | 1.18893500  |
| C | 1.36049700  | 2.50398600  | -1.69871400 | H      | 1.02671400  | -2.47556200 | -3.77517800 |
| C | 2.34458800  | 3.47191100  | -1.95742900 | N      | 1.01851000  | -0.91292000 | -0.96450900 |
| C | 3.29571800  | 3.76290000  | -0.96628100 | N      | 1.21133900  | -2.12008200 | -2.84341800 |
| C | 3.24003500  | 3.07719200  | 0.26095200  | H      | -4.91483200 | -4.44205100 | 1.18019100  |
| C | 2.23667900  | 2.12298600  | 0.46373400  | H      | -4.72058300 | -3.11492700 | -0.90545200 |
| H | 0.61764100  | 2.26246500  | -2.44575800 |        |             |             |             |
| H | 2.35284700  | 3.97616500  | -2.91637400 | [Z8]2+ |             |             |             |
| H | 4.06657100  | 4.50559100  | -1.14049200 | Co     | -0.00011200 | 0.49946100  | 0.00001100  |
| H | 3.96487300  | 3.28315600  | 1.03942700  | C      | 1.72770100  | 1.35673700  | 2.08767200  |
| N | 1.30666800  | 1.84680100  | -0.51801200 | C      | 0.18005600  | -0.32753700 | 2.72979700  |
| N | 1.01438300  | 0.47282600  | 1.60249300  | C      | 0.67576700  | -0.34820700 | 4.04072900  |
| C | -2.23713100 | -2.54747500 | 1.99310000  | C      | 1.73449100  | 0.52169900  | 4.36598900  |
| C | -2.11193300 | -1.77586400 | 0.79539500  | C      | 2.26685100  | 1.37923500  | 3.38993900  |
| C | -3.01388500 | -1.97386400 | -0.26994500 | C      | 2.18053300  | 2.18821700  | 0.95076900  |
| C | -4.01149900 | -2.94039100 | -0.10187500 | C      | 1.83562500  | 2.66387200  | -1.32665100 |
| C | -4.12367400 | -3.70310800 | 1.09635200  | C      | 2.86254600  | 3.62451800  | -1.32111100 |
| C | -3.23753400 | -3.51894600 | 2.16522500  | C      | 3.56148500  | 3.86218700  | -0.12445000 |
| C | -0.50827300 | -1.14965900 | 2.19945900  | C      | 3.21628000  | 3.13424000  | 1.02848700  |
| H | -2.95166100 | -1.40548900 | -1.18893400 | H      | 0.26195800  | -1.01517700 | 4.78814600  |
| H | -3.31822200 | -4.09643600 | 3.07986700  | H      | 2.13984100  | 0.52740400  | 5.37185300  |
| H | -1.02671800 | -2.47555700 | 3.77518100  | H      | 3.08336700  | 2.04523000  | 3.63918200  |
| N | -1.21134200 | -2.12007800 | 2.84342000  | H      | 1.27509700  | 2.45470100  | -2.23021900 |

|   |             |             |             |        |             |             |             |
|---|-------------|-------------|-------------|--------|-------------|-------------|-------------|
| H | 3.09982800  | 4.16459300  | -2.23078400 | C      | -2.55241400 | -2.61103000 | 1.88586900  |
| H | 4.35872100  | 4.59726700  | -0.08625500 | C      | -4.19418200 | -3.81340200 | 0.90042100  |
| H | 3.74488600  | 3.30600500  | 1.95875800  | C      | -3.06071200 | -2.26015500 | -0.44660200 |
| N | 0.70383900  | 0.51218400  | 1.78764300  | C      | -0.89875700 | -1.15022800 | 2.18595200  |
| N | 1.50189900  | 1.96272500  | -0.21945600 | H      | -4.96954000 | -4.56830600 | 0.96099100  |
| C | -0.17993200 | -0.32800200 | -2.72966800 | H      | -2.93957800 | -1.79961500 | -1.42096800 |
| C | -1.72834400 | 1.35565100  | -2.08778800 | H      | -1.60259400 | -2.39309300 | 3.79570400  |
| C | -2.26752600 | 1.37768300  | -3.39005200 | N      | -1.66422900 | -2.10547700 | 2.82516500  |
| C | -1.73478900 | 0.52023500  | -4.36597400 | H      | 4.97173600  | -4.56614200 | -0.96062400 |
| C | -0.67565400 | -0.34912200 | -4.04058800 | N      | -3.49653500 | -3.55865100 | 2.03557800  |
| H | -3.08435800 | 2.04325700  | -3.63938700 | N      | -4.01742500 | -3.21302000 | -0.31575100 |
| H | -2.14016600 | 0.52558200  | -5.37182900 | N      | -1.23979600 | -1.00939900 | 0.89086800  |
| H | -0.26155000 | -1.01605300 | -4.78787800 | N      | 3.49820100  | -3.55730100 | -2.03525000 |
| C | -1.83687800 | 2.66335200  | 1.32630600  | N      | 4.01900100  | -3.21121100 | 0.31603200  |
| C | -2.86424700 | 3.62351800  | 1.32059000  |        |             |             |             |
| C | -3.56328800 | 3.86064900  | 0.12388200  | [Z8]3+ |             |             |             |
| C | -3.21773500 | 3.13265900  | -1.02892300 | Co     | 0.00000900  | 0.44296600  | -0.00000600 |
| C | -2.18155400 | 2.18712500  | -0.95102700 | C      | -1.93758600 | 1.32349700  | -1.82471600 |
| H | -1.27624900 | 2.45460900  | 2.22991300  | C      | -0.47594200 | -0.37108200 | -2.66229600 |
| H | -3.10178600 | 4.16364700  | 2.23016400  | C      | -1.10816500 | -0.36339900 | -3.91091700 |
| H | -4.36086600 | 4.59535000  | 0.08555000  | C      | -2.18953700 | 0.52626700  | -4.09654700 |
| H | -3.74640700 | 3.30401900  | -1.95923200 | C      | -2.61342600 | 1.37633000  | -3.05917400 |
| N | -1.50282500 | 1.96215500  | 0.21924100  | C      | -2.18919000 | 2.11537400  | -0.60907900 |
| N | -0.70408400 | 0.51162400  | -1.78763500 | C      | -1.45744600 | 2.48554200  | 1.60915400  |
| C | 2.55363300  | -2.61011700 | -1.88559800 | C      | -2.44773100 | 3.46273400  | 1.80142900  |
| C | 2.27892600  | -1.91405200 | -0.66807800 | C      | -3.32503100 | 3.76553900  | 0.74828300  |
| C | 3.06183500  | -2.25879400 | 0.44682900  | C      | -3.19254300 | 3.08061500  | -0.47383200 |
| C | 4.19600200  | -3.81162200 | -0.90009100 | H      | -0.78326100 | -1.01309800 | -4.71457300 |
| C | 0.89927500  | -1.15012600 | -2.18575000 | H      | -2.69816400 | 0.55468400  | -5.05357000 |
| H | 2.94051100  | -1.79822500 | 1.42115700  | H      | -3.44141500 | 2.05706200  | -3.21300100 |
| H | 1.60366000  | -2.39276600 | -3.79543100 | H      | -0.77069100 | 2.23763000  | 2.40580700  |
| N | 1.66518000  | -2.10506600 | -2.82490900 | H      | -2.51571300 | 3.96533700  | 2.75876100  |
| N | 1.24028400  | -1.00902000 | -0.89069300 | H      | -4.09748300 | 4.51675300  | 0.87066700  |
| C | -2.27800200 | -1.91494100 | 0.66829800  | H      | -3.85914000 | 3.29703500  | -1.29981900 |

|   |             |             |             |        |             |             |             |
|---|-------------|-------------|-------------|--------|-------------|-------------|-------------|
| N | -0.90706800 | 0.45737900  | -1.66876800 | C      | 0.65840000  | -1.15499200 | -2.18595900 |
| N | -1.33017800 | 1.82897900  | 0.43372800  | H      | 4.90618600  | -4.38612700 | -1.06897200 |
| C | 0.47592300  | -0.37103500 | 2.66230500  | H      | 2.99206400  | -1.55507200 | 1.32299900  |
| C | 1.93762400  | 1.32347800  | 1.82469100  | H      | 1.29648800  | -2.45736500 | -3.75463500 |
| C | 2.61345600  | 1.37632200  | 3.05915300  | N      | 1.40853000  | -2.11166900 | -2.80610900 |
| C | 2.18953100  | 0.52630300  | 4.09654700  | H      | -4.90633500 | -4.38594200 | 1.06907000  |
| C | 1.10813200  | -0.36333400 | 3.91093200  | N      | 3.32864800  | -3.46560300 | -2.07353800 |
| H | 3.44146500  | 2.05703300  | 3.21296800  | N      | 4.01259500  | -2.98801400 | 0.20617700  |
| H | 2.69815000  | 0.55473100  | 5.05357300  | N      | 1.08226800  | -0.93285000 | -0.91596600 |
| H | 0.78319800  | -1.01299700 | 4.71460500  | N      | -3.32877700 | -3.46543500 | 2.07361900  |
| C | 1.45754600  | 2.48544700  | -1.60921200 | N      | -4.01267400 | -2.98791400 | -0.20612400 |
| C | 2.44786600  | 3.46259900  | -1.80150800 |        |             |             |             |
| C | 3.32516600  | 3.76540800  | -0.74836100 | [Z9]2+ |             |             |             |
| C | 3.19264400  | 3.08052300  | 0.47377200  | Co     | 0.07769100  | -0.00000300 | 0.00000100  |
| C | 2.18925800  | 2.11531800  | 0.60903700  | C      | 2.63444900  | 0.13542700  | -1.18127500 |
| H | 0.77078800  | 2.23753800  | -2.40586400 | C      | 2.63442300  | -0.13543300 | 1.18133300  |
| H | 2.51587600  | 3.96517000  | -2.75885400 | C      | 4.03882900  | -0.13716900 | 1.21303000  |
| H | 4.09764300  | 4.51659400  | -0.87075900 | C      | 4.73965600  | -0.00001200 | 0.00005200  |
| H | 3.85924100  | 3.29694500  | 1.29975900  | C      | 4.03885600  | 0.13715200  | -1.21294200 |
| N | 1.33024300  | 1.82892400  | -0.43376800 | C      | 1.71909800  | 0.27020000  | -2.33037600 |
| N | 0.90708300  | 0.45738400  | 1.66875700  | C      | -0.53143800 | 0.34730500  | -2.98141900 |
| C | -2.37329800 | -2.53739000 | 1.89936100  | C      | 1.08212000  | 0.54347800  | -4.62757600 |
| C | -2.16570800 | -1.78954500 | 0.70216500  | C      | 2.10423000  | 0.43065600  | -3.66801100 |
| C | -3.04398300 | -2.05688300 | -0.36483600 | H      | 4.57620400  | -0.24246900 | 2.14778600  |
| C | -4.11720300 | -3.64819300 | 0.98730800  | H      | 5.82400600  | -0.00001700 | 0.00006300  |
| C | -0.65843700 | -1.15492700 | 2.18597900  | H      | 4.57625100  | 0.24244600  | -2.14768700 |
| H | -2.99207100 | -1.55506200 | -1.32299400 | H      | -1.57778600 | 0.31537000  | -2.70861800 |
| H | -1.29660700 | -2.45719800 | 3.75470600  | H      | 1.31276000  | 0.66846700  | -5.67990100 |
| N | -1.40862400 | -2.11153700 | 2.80616400  | H      | 3.14397800  | 0.46885000  | -3.96622200 |
| N | -1.08227900 | -0.93282000 | 0.91597100  | C      | -0.53150400 | -0.34729800 | 2.98141000  |
| C | 2.16565400  | -1.78962200 | -0.70213300 | C      | 1.08201800  | -0.54345400 | 4.62760400  |
| C | 2.37320600  | -2.53751600 | -1.89930400 | C      | 2.10414900  | -0.43064000 | 3.66806000  |
| C | 4.11708000  | -3.64834800 | -0.98722800 | C      | 1.71904600  | -0.27019800 | 2.33041500  |
| C | 3.04393500  | -2.05694600 | 0.36486700  | H      | -1.57784600 | -0.31536700 | 2.70858600  |

|   |             |             |             |        |             |                         |
|---|-------------|-------------|-------------|--------|-------------|-------------------------|
| H | 1.31263500  | -0.66843300 | 5.67993500  |        |             |                         |
| H | 3.14389000  | -0.46882700 | 3.96629500  | [Z9]3+ |             |                         |
| N | 0.38401400  | -0.22969800 | 1.99172900  | Co     | -0.00002900 | 0.00000000 0.00000000   |
| N | 1.97391400  | -0.00000200 | 0.00002200  | C      | -2.53528000 | 0.87684500 0.81134700   |
| N | 0.38405900  | 0.22969800  | -1.99171900 | C      | -2.53527700 | -0.87685100 -0.81135000 |
| C | -2.55014400 | -1.18002500 | -0.12783900 | C      | -3.93841800 | -0.89953300 -0.83196200 |
| C | -2.55014600 | 1.18002100  | 0.12780200  | C      | -4.63454800 | -0.00000600 -0.00000300 |
| C | -3.95622000 | 1.20715700  | 0.13176200  | C      | -3.93842200 | 0.89952300 0.83195700   |
| C | -4.66137900 | -0.00000400 | -0.00001600 | C      | -1.59633500 | 1.70987500 1.58170800   |
| C | -3.95621900 | -1.20716400 | -0.13179600 | C      | 0.68200000  | 2.14983900 1.98594300   |
| C | -1.69756100 | -2.38657300 | -0.25984700 | C      | -0.89525900 | 3.39300900 3.13885100   |
| C | 0.48651000  | -3.21175700 | -0.35808300 | C      | -1.94405900 | 2.70301800 2.50156000   |
| C | -1.24622400 | -4.73259400 | -0.51300400 | H      | -4.47765900 | -1.58922100 -1.46945700 |
| C | -2.18929600 | -3.69609900 | -0.39744400 | H      | -5.71859000 | -0.00000700 -0.00000400 |
| H | -4.49317200 | 2.14147200  | 0.23565700  | H      | -4.47766500 | 1.58921000 1.46945100   |
| H | -5.74571300 | -0.00000500 | -0.00001400 | H      | 1.72217000  | 1.93537500 1.78637200   |
| H | -4.49317000 | -2.14147900 | -0.23568900 | H      | -1.09682500 | 4.17471500 3.86249600   |
| H | 1.55188800  | -3.01608900 | -0.34284000 | H      | -2.97628500 | 2.94062100 2.72323900   |
| H | -1.56085400 | -5.76498300 | -0.62159300 | C      | 0.68200700  | -2.14983600 -1.98594400 |
| H | -3.24729200 | -3.92207600 | -0.41689300 | C      | -0.89524700 | -3.39301100 -3.13885300 |
| C | 0.48650400  | 3.21175600  | 0.35807300  | C      | -1.94404900 | -2.70302300 -2.50156300 |
| C | -1.24623400 | 4.73259500  | 0.51293600  | C      | -1.59632900 | -1.70987900 -1.58171000 |
| C | -2.18930400 | 3.69609800  | 0.39737400  | H      | 1.72217700  | -1.93537000 -1.78637100 |
| C | -1.69756500 | 2.38657000  | 0.25980900  | H      | -1.09681000 | -4.17471800 -3.86249800 |
| H | 1.55188200  | 3.01608800  | 0.34285800  | H      | -2.97627400 | -2.94062900 -2.72324300 |
| H | -1.56086600 | 5.76498600  | 0.62150200  | N      | -0.26465300 | -1.43785700 -1.32839300 |
| H | -3.24730000 | 3.92207400  | 0.41679800  | N      | -1.88880100 | -0.00000300 -0.00000100 |
| N | -0.34872100 | 2.15581700  | 0.24111900  | N      | -0.26465800 | 1.43785700 1.32839200   |
| N | -1.87616800 | -0.00000200 | -0.00001800 | C      | 2.53527600  | -0.81145200 0.87672600  |
| N | -0.34871700 | -2.15581900 | -0.24112800 | C      | 2.53527400  | 0.81145700 -0.87672400  |
| N | -0.23402900 | -0.50191000 | 4.29020600  | C      | 3.93841800  | 0.83206100 -0.89943300  |
| N | 0.09357600  | -4.50005400 | -0.49423800 | C      | 4.63455800  | 0.00000400 0.00000100   |
| N | 0.09356600  | 4.50005600  | 0.49420000  | C      | 3.93842000  | -0.83205400 0.89943500  |
| N | -0.23393500 | 0.50192800  | -4.29020700 | C      | 1.59633800  | -1.58180200 1.70974100  |

|         |             |             |             |   |             |             |             |
|---------|-------------|-------------|-------------|---|-------------|-------------|-------------|
| C       | -0.68199600 | -1.98595800 | 2.14982200  | H | -5.76526700 | -0.07404800 | -0.06333400 |
| C       | 0.89527900  | -3.13904100 | 3.39280900  | H | -4.60672900 | -0.03153700 | 2.16380900  |
| C       | 1.94407500  | -2.50178500 | 2.70276500  | H | 1.60132800  | 0.06502200  | 2.71875300  |
| H       | 4.47764800  | 1.46961700  | -1.58907000 | H | -1.24582300 | 0.07296900  | 5.75132000  |
| H       | 5.71859900  | 0.00000500  | 0.00000100  | H | -3.10427300 | 0.02112600  | 4.05073500  |
| H       | 4.47765000  | -1.46960900 | 1.58907300  | C | 0.42831600  | -0.03282500 | -3.03341300 |
| H       | -1.72217100 | -1.78614400 | 1.93556000  | C | -1.25109600 | -0.07909000 | -4.63248400 |
| H       | 1.09685900  | -3.86282400 | 4.17438400  | C | -2.23708400 | -0.07511700 | -3.62665200 |
| H       | 2.97629600  | -2.72361500 | 2.94024000  | C | -1.79028500 | -0.04867500 | -2.30363500 |
| C       | -0.68199900 | 1.98595700  | -2.14982100 | H | 1.48559400  | -0.01710800 | -2.80470500 |
| C       | 0.89527500  | 3.13904400  | -3.39280700 | H | -1.51827900 | -0.09923300 | -5.68325000 |
| C       | 1.94407100  | 2.50179000  | -2.70276200 | H | -3.29473100 | -0.09203200 | -3.85693500 |
| C       | 1.59633600  | 1.58180500  | -1.70973900 | N | -0.44760400 | -0.02752500 | -2.00164100 |
| H       | -1.72217300 | 1.78614100  | -1.93555900 | N | -1.97375900 | -0.01615900 | 0.04783600  |
| H       | 1.09685300  | 3.86282800  | -4.17438100 | N | -0.36976400 | 0.02877600  | 2.02077500  |
| H       | 2.97629200  | 2.72362200  | -2.94023700 | C | 2.55595800  | -1.14552800 | -0.02819300 |
| N       | 0.26464000  | 1.32839900  | -1.43785500 | C | 2.54516200  | 1.20987500  | -0.05965700 |
| N       | 1.88878800  | 0.00000200  | 0.00000100  | C | 3.94872500  | 1.19693500  | -0.07977300 |
| N       | 0.26464200  | -1.32839800 | 1.43785700  | C | 4.59152500  | -0.05562300 | -0.07210700 |
| N       | 0.40916600  | -3.11812700 | -2.88243300 | C | 1.73820500  | -2.37964700 | -0.00052100 |
| N       | -0.40913500 | -2.88252400 | 3.11804700  | C | -0.40556600 | -3.28310800 | 0.04398600  |
| N       | -0.40913900 | 2.88252500  | -3.11804500 | C | 1.39115500  | -4.74693600 | 0.02738300  |
| N       | 0.40915500  | 3.11812900  | 2.88243300  | C | 2.29305900  | -3.66624300 | 0.00245300  |
|         |             |             |             | H | 4.53270900  | 2.10703200  | -0.09996300 |
| [Z10]2+ |             |             |             | H | 5.67310000  | -0.12837100 | -0.08619600 |
| Co      | -0.08545700 | 0.00570500  | 0.00624800  | H | -1.47809800 | -3.13398100 | 0.06046100  |
| C       | -2.62764900 | -0.01143400 | 1.24177000  | H | 1.74224700  | -5.77311900 | 0.03097400  |
| C       | -2.66667100 | -0.04240900 | -1.11790600 | H | 3.36521900  | -3.81176100 | -0.01440300 |
| C       | -4.68303700 | -0.05760300 | -0.00371400 | C | -0.47798600 | 3.26127200  | -0.04372900 |
| C       | -4.03022100 | -0.03334000 | 1.24797400  | C | 1.26297500  | 4.78457400  | -0.09973400 |
| C       | -1.69972100 | 0.01606700  | 2.38761700  | C | 2.20220300  | 3.73570200  | -0.09683800 |
| C       | 0.55832700  | 0.05556900  | 3.00445900  | C | 1.69986000  | 2.42643500  | -0.06493100 |
| C       | -1.03101900 | 0.05959800  | 4.68854800  | H | -1.54437700 | 3.07369300  | -0.02449800 |
| C       | -2.06866600 | 0.03064100  | 3.73627100  | H | 1.58109000  | 5.82110900  | -0.12350800 |

|         |             |             |             |         |             |             |             |
|---------|-------------|-------------|-------------|---------|-------------|-------------|-------------|
| H       | 3.26224900  | 3.95291100  | -0.11921100 | N       | -1.88230200 | 0.00316200  | 0.02173000  |
| N       | 0.35078300  | 2.19409700  | -0.03773500 | N       | -0.27322600 | 1.39236500  | 1.39033100  |
| N       | 1.86255800  | 0.02615600  | -0.03293600 | C       | 2.54563300  | -0.83650200 | 0.80785700  |
| N       | 0.38515000  | -2.18663000 | 0.02114600  | C       | 2.54101200  | 0.84104700  | -0.86730400 |
| N       | 0.07530300  | -0.05787600 | -4.33845200 | C       | 3.94203500  | 0.82096400  | -0.86611900 |
| N       | 0.04434300  | -4.56116100 | 0.04776800  | C       | 4.57371300  | -0.07837000 | 0.02549700  |
| N       | -0.07550800 | 4.55466600  | -0.07381300 | C       | 1.62768600  | -1.64498800 | 1.62788600  |
| N       | 3.90212800  | -1.22361200 | -0.04720800 | C       | -0.63127900 | -2.07853800 | 2.09436900  |
| N       | 0.27707800  | 0.07184300  | 4.32696900  | C       | 0.98651600  | -3.26611600 | 3.26155000  |
| N       | -4.01034200 | -0.06275200 | -1.18581900 | C       | 2.01655900  | -2.59287100 | 2.57146100  |
|         |             |             |             | H       | 4.53121500  | 1.45870000  | -1.51218700 |
| [Z10]3+ |             |             |             | H       | 5.65471500  | -0.13897300 | 0.07298800  |
| Co      | 0.00000300  | 0.00561600  | -0.00002500 | H       | -1.67905500 | -1.88390900 | 1.91431000  |
| C       | -2.54122500 | 0.83995900  | 0.86752400  | H       | 1.20832200  | -4.01704600 | 4.01122400  |
| C       | -2.54540900 | -0.83670400 | -0.80852800 | H       | 3.06406300  | -2.79348000 | 2.75744900  |
| C       | -4.57368800 | -0.07923700 | -0.02599100 | C       | -0.67135100 | 2.08682900  | -2.06764700 |
| C       | -3.94223900 | 0.81982300  | 0.86606200  | C       | 0.90613800  | 3.28109500  | -3.27556900 |
| C       | -1.60583000 | 1.65087000  | 1.66511100  | C       | 1.95688000  | 2.60672900  | -2.61854900 |
| C       | 0.67085800  | 2.08501700  | 2.06931100  | C       | 1.60540000  | 1.65218500  | -1.66442700 |
| C       | -0.90692100 | 3.27857400  | 3.27758700  | H       | -1.71279900 | 1.88893800  | -1.85786800 |
| C       | -1.95752700 | 2.60468600  | 2.61985700  | H       | 1.10763000  | 4.03533300  | -4.02763200 |
| H       | -5.65467700 | -0.13986300 | -0.07374400 | H       | 2.99057600  | 2.82799800  | -2.85090200 |
| H       | -4.53156500 | 1.45736300  | 1.51219200  | N       | 0.27285300  | 1.39344900  | -1.38955200 |
| H       | 1.71234800  | 1.88733100  | 1.85946700  | N       | 1.88231100  | 0.00393300  | -0.02166700 |
| H       | -1.10857900 | 4.03216100  | 4.03025800  | N       | 0.29255900  | -1.38565800 | 1.38723300  |
| H       | -2.99128100 | 2.82576300  | 2.85212700  | N       | 0.32421300  | -3.00754900 | -3.02330400 |
| C       | 0.63178000  | -2.07790000 | -2.09518800 | N       | -0.32352200 | -3.00856400 | 3.02205000  |
| C       | -0.98577200 | -3.26502600 | -3.26314600 | N       | -0.39519200 | 3.02129200  | -3.00082500 |
| C       | -2.01594000 | -2.59207700 | -2.57296100 | N       | 3.88504800  | -0.90494800 | 0.85963700  |
| C       | -1.62725100 | -1.64459500 | -1.62889700 | N       | 0.39447900  | 3.01876600  | 3.00314500  |
| H       | 1.67952700  | -1.88348100 | -1.91481600 | N       | -3.88481100 | -0.90525700 | -0.86051600 |
| H       | -1.20743000 | -4.01546200 | -4.01335900 |         |             |             |             |
| H       | -3.06340900 | -2.79263800 | -2.75920600 | [Z11]2+ |             |             |             |
| N       | -0.29217400 | -1.38520400 | -1.38799500 | Co      | -0.08033200 | 0.00319700  | 0.00478000  |



|   |             |             |             |         |             |             |             |
|---|-------------|-------------|-------------|---------|-------------|-------------|-------------|
| C | -2.64428400 | -0.05985400 | -1.14245600 | H       | 4.51187900  | 2.13922700  | -0.08283000 |
| C | -2.62082500 | -0.03117900 | 1.22456200  | H       | -1.59679000 | 2.98303100  | -0.00940500 |
| C | -4.02571800 | -0.06095900 | 1.21837300  | H       | 1.64415900  | 5.84717100  | -0.09031600 |
| C | -4.66736200 | -0.08822900 | -0.03617100 | H       | 3.24754500  | 3.93385500  | -0.08934900 |
| C | -1.76089200 | -0.05673300 | -2.32168000 | C       | -0.42111100 | -3.25535400 | 0.04508600  |
| C | 0.48259100  | -0.02038800 | -3.01337000 | C       | 0.07989100  | -4.57171400 | 0.05260600  |
| C | 0.09288800  | -0.04331900 | -4.36524800 | C       | 1.47269200  | -4.77070600 | 0.03672400  |
| C | -1.27583000 | -0.07427000 | -4.68608900 | C       | 2.32385400  | -3.65062200 | 0.01332100  |
| C | -2.22112600 | -0.08115700 | -3.64341800 | C       | 1.74611000  | -2.37063400 | 0.00672600  |
| H | -4.60938600 | -0.06284700 | 2.12955100  | H       | -1.48915800 | -3.06713200 | 0.05723400  |
| H | -5.74953700 | -0.11100200 | -0.10257900 | H       | -0.60850600 | -5.40948500 | 0.07054500  |
| H | 1.52990900  | 0.00333600  | -2.74020300 | H       | 1.88737200  | -5.77348500 | 0.04231600  |
| H | 0.85274900  | -0.03701000 | -5.13853200 | H       | 3.40261000  | -3.75065200 | 0.00031300  |
| H | -1.60039200 | -0.09257200 | -5.72119400 | N       | 0.39344700  | -2.17693000 | 0.02279800  |
| H | -3.28769800 | -0.10447300 | -3.83532400 | N       | 1.85962200  | 0.03785300  | -0.02318800 |
| C | 0.56670300  | 0.05343400  | 2.99180100  | N       | 0.32613300  | 2.18693800  | -0.02694500 |
| C | -1.12711300 | 0.04353300  | 4.72621600  | N       | 3.90674900  | -1.19791100 | -0.03527500 |
| C | -2.10919700 | 0.01023600  | 3.71887400  | C       | -0.10490100 | 4.56310000  | -0.04994100 |
| C | -1.70401800 | 0.00061500  | 2.37742900  | H       | -0.83291900 | 5.36671700  | -0.04958800 |
| H | 1.60284400  | 0.06944900  | 2.67910100  | C       | 0.22834500  | 0.06551400  | 4.35739200  |
| H | -1.41668100 | 0.05197200  | 5.77163100  | N       | -3.98983500 | -0.08829900 | -1.21699400 |
| H | -3.16156500 | -0.00722400 | 3.97764500  | H       | 1.01542200  | 0.09126800  | 5.10235000  |
| N | -0.37274000 | 0.02197200  | 2.01997100  |         |             |             |             |
| N | -1.96336900 | -0.03104700 | 0.03226600  | [Z11]3+ |             |             |             |
| N | -0.42200800 | -0.02689300 | -2.00767600 | Co      | 0.00318200  | -0.01384000 | 0.00825400  |
| C | 2.52718300  | 1.23060200  | -0.04618500 | C       | -2.54030400 | -0.96945900 | -0.63856500 |
| C | 2.55737400  | -1.13317900 | -0.01850300 | C       | -2.49906900 | 0.73710100  | 1.02266100  |
| C | 4.58298200  | -0.02084800 | -0.05787300 | C       | -3.89802000 | 0.70815000  | 1.06419000  |
| C | 3.93340900  | 1.22568000  | -0.06449900 | C       | -4.55252300 | -0.19800300 | 0.20312100  |
| C | 1.67118100  | 2.43835100  | -0.04896000 | C       | -1.64278400 | -1.74454500 | -1.50787700 |
| C | -0.53948700 | 3.22390600  | -0.02733400 | C       | 0.60999200  | -2.01051300 | -2.16529500 |
| C | 1.27594100  | 4.82671700  | -0.07262000 | C       | 0.22549800  | -2.94099400 | -3.14525400 |
| C | 2.17996300  | 3.74878700  | -0.07213500 | C       | -1.12751800 | -3.27248600 | -3.28903500 |
| H | 5.66565600  | -0.08421400 | -0.07087900 | C       | -2.07370000 | -2.67346700 | -2.44683800 |

|   |             |             |             |         |             |             |             |
|---|-------------|-------------|-------------|---------|-------------|-------------|-------------|
| H | -4.47023800 | 1.36176000  | 1.71145500  | H       | -1.47033000 | -1.86327400 | 2.08363800  |
| H | -5.63539200 | -0.24732000 | 0.18002800  | H       | -0.67243000 | -3.63910600 | 3.61773900  |
| H | 1.65620500  | -1.78223800 | -2.01038000 | H       | 1.79004000  | -4.07985200 | 3.81729300  |
| H | 0.98697400  | -3.39496000 | -3.76828000 | H       | 3.38371900  | -2.68018600 | 2.45206500  |
| H | -1.44299000 | -3.98142600 | -4.04653400 | N       | 0.44362900  | -1.39326000 | 1.35792500  |
| H | -3.13043700 | -2.90708400 | -2.51027700 | N       | 1.87107300  | 0.07985100  | -0.14124400 |
| C | 0.74858700  | 2.06371100  | 2.03798700  | N       | 0.10211100  | 1.39217500  | -1.38601600 |
| C | -0.88063400 | 3.20198900  | 3.42304900  | N       | 3.97761600  | -0.72901900 | 0.59712000  |
| C | -1.89521300 | 2.48190400  | 2.77097100  | C       | -0.73839500 | 3.05772800  | -2.91754400 |
| C | -1.54756400 | 1.56572300  | 1.77550300  | H       | -1.59609300 | 3.54332800  | -3.36503900 |
| H | 1.77204600  | 1.91944300  | 1.71521800  | C       | 0.45050500  | 2.99821000  | 3.04821100  |
| H | -1.13189100 | 3.90581900  | 4.20868800  | N       | -3.89027500 | -1.03932400 | -0.64859000 |
| H | -2.93649000 | 2.63789000  | 3.02930900  | H       | 1.25984300  | 3.53951600  | 3.52094400  |
| N | -0.22620100 | 1.35162500  | 1.42239000  |         |             |             |             |
| N | -1.86546200 | -0.09932200 | 0.15538500  | [Z12]2+ |             |             |             |
| N | -0.30844700 | -1.40969900 | -1.36746500 | Co      | -0.08210200 | -0.00001300 | -0.00000600 |
| C | 2.42534000  | 0.96259400  | -1.03305500 | C       | -2.62486300 | 0.16291100  | 1.17592500  |
| C | 2.62461500  | -0.74159700 | 0.63817700  | C       | -2.62504000 | -0.16293600 | -1.17557700 |
| C | 4.56139800  | 0.15312400  | -0.28370100 | C       | -4.03536200 | -0.15727400 | -1.15817800 |
| C | 3.82427400  | 1.00808800  | -1.13356300 | C       | -1.72266000 | 0.32585400  | 2.32760200  |
| C | 1.39589700  | 1.75262000  | -1.72558500 | C       | 0.54417200  | 0.41456800  | 2.95759800  |
| C | -0.94267600 | 2.01876500  | -1.99374300 | C       | 0.19440600  | 0.60739800  | 4.30569200  |
| C | 0.56557300  | 3.44579300  | -3.23204600 | C       | -1.16494000 | 0.66014900  | 4.65797400  |
| C | 1.64682700  | 2.76903500  | -2.64292500 | C       | -2.13882700 | 0.51792000  | 3.65269500  |
| H | 5.64552200  | 0.17478800  | -0.29456600 | H       | -4.61960200 | -0.27779200 | -2.06232100 |
| H | 4.33414100  | 1.67017100  | -1.82362000 | H       | 1.58326700  | 0.37228500  | 2.65753500  |
| H | -1.94338200 | 1.68249200  | -1.76835200 | H       | 0.97500900  | 0.71318500  | 5.05033400  |
| H | 0.74724000  | 4.25365500  | -3.93187700 | H       | -1.46387200 | 0.80898600  | 5.69016000  |
| H | 2.66655500  | 3.03095800  | -2.90101400 | H       | -3.19343000 | 0.55774800  | 3.90027500  |
| C | -0.41666400 | -2.09978500 | 2.13488700  | C       | 0.54373500  | -0.41455800 | -2.95772200 |
| C | 0.04546400  | -3.08230900 | 3.02666600  | C       | -1.16562600 | -0.66014400 | -4.65785100 |
| C | 1.41722400  | -3.32200100 | 3.13709300  | C       | -2.13935500 | -0.51794700 | -3.65241500 |
| C | 2.30904500  | -2.56446300 | 2.36815600  | C       | -1.72299000 | -0.32588000 | -2.32738100 |
| C | 1.80035300  | -1.61189600 | 1.49338100  | H       | 1.58287400  | -0.37228700 | -2.65781900 |

|   |             |             |             |         |             |             |             |
|---|-------------|-------------|-------------|---------|-------------|-------------|-------------|
| H | -1.46472400 | -0.80897500 | -5.68998800 | N       | -4.72334400 | 0.00001200  | 0.00032700  |
| H | -3.19400100 | -0.55780100 | -3.89981600 | C       | -4.03519200 | 0.15729400  | 1.15873200  |
| N | -0.38829800 | -0.27594600 | -1.98733000 | H       | 4.53114600  | 2.05757200  | -0.27205300 |
| N | -1.96357400 | -0.00001700 | 0.00012500  | H       | -4.61928800 | 0.27782200  | 2.06294300  |
| N | -0.38800000 | 0.27593400  | 1.98736000  |         |             |             |             |
| C | 2.53588400  | -1.17488600 | 0.15385400  | [Z12]3+ |             |             |             |
| C | 2.53584700  | 1.17489200  | -0.15415900 | Co      | 0.00011800  | -0.00000400 | 0.00000000  |
| C | 3.94809500  | -1.15338700 | 0.15142900  | C       | -2.52482700 | 1.08226900  | 0.50061200  |
| C | 1.70099200  | -2.38619200 | 0.31374600  | C       | -2.52484500 | -1.08221900 | -0.50064400 |
| C | -0.49978500 | -3.19567500 | 0.42770900  | C       | -3.93663500 | -1.06437400 | -0.49378800 |
| C | 1.33671800  | -4.76063300 | 0.62136300  | C       | -1.60034100 | 2.11794800  | 0.97909300  |
| C | 2.22648600  | -3.68082900 | 0.47823100  | C       | 0.68969300  | 2.64741400  | 1.22658100  |
| H | 4.53122400  | -2.05754500 | 0.27152900  | C       | 0.36544900  | 3.88907500  | 1.79984300  |
| H | -1.56034500 | -2.97026200 | 0.40367400  | C       | -0.98357500 | 4.24063800  | 1.96007800  |
| H | 1.71941700  | -5.76786400 | 0.74930500  | C       | -1.98151300 | 3.33968300  | 1.54263000  |
| H | 3.29601600  | -3.85426200 | 0.49581000  | H       | -4.52393400 | -1.88930400 | -0.87739100 |
| C | -0.49986500 | 3.19566200  | -0.42768800 | H       | 1.72372800  | 2.36188400  | 1.09581300  |
| C | -0.04804100 | 4.51781200  | -0.59640800 | H       | 1.16442100  | 4.55286100  | 2.10763500  |
| C | 1.33660600  | 4.76063800  | -0.62148900 | H       | -1.25896000 | 5.19302200  | 2.39929400  |
| C | 2.22640500  | 3.68084400  | -0.47846500 | H       | -3.02999400 | 3.58859200  | 1.65585600  |
| C | 1.70094200  | 2.38619900  | -0.31395200 | C       | 0.68965500  | -2.64742900 | -1.22658800 |
| H | -1.56042200 | 2.97023700  | -0.40355700 | C       | -0.98363900 | -4.24062000 | -1.96010100 |
| H | -0.76486400 | 5.32424400  | -0.70373800 | C       | -1.98156300 | -3.33965200 | -1.54264900 |
| H | 1.71927000  | 5.76788200  | -0.74944800 | C       | -1.60037400 | -2.11791900 | -0.97911300 |
| H | 3.29592800  | 3.85429700  | -0.49614900 | H       | 1.72369200  | -2.36191800 | -1.09580500 |
| N | 0.35242100  | 2.15624100  | -0.28977000 | H       | -1.25903200 | -5.19299800 | -2.39932100 |
| N | 1.86127300  | -0.00000200 | -0.00012200 | H       | -3.03004800 | -3.58854600 | -1.65587900 |
| N | 0.35248200  | -2.15623900 | 0.28969200  | N       | -0.26737100 | -1.78120300 | -0.82500100 |
| C | -0.04792700 | -4.51782100 | 0.59641100  | N       | -1.88028000 | 0.00001700  | -0.00001100 |
| H | -0.76478200 | -5.32418300 | 0.70381700  | N       | -0.26734200 | 1.78120300  | 0.82499200  |
| C | 0.19376100  | -0.60737200 | -4.30577300 | C       | 2.52503100  | -0.50064500 | 1.08228300  |
| H | 0.97431300  | -0.71311700 | -5.05044200 | C       | 2.52505900  | 0.50060000  | -1.08224100 |
| C | 3.94806100  | 1.15341900  | -0.15190200 | C       | 3.93681000  | -0.49382300 | 1.06441100  |
| N | 4.64044000  | 0.00002000  | -0.00026600 | C       | 1.60043000  | -0.97915000 | 2.11791800  |

|   |             |             |             |   |             |             |             |
|---|-------------|-------------|-------------|---|-------------|-------------|-------------|
| C | -0.68975800 | -1.22663300 | 2.64687500  | H | 3.02977800  | 1.65586900  | -3.58889400 |
| C | 0.98311400  | -1.96028500 | 4.24040300  | N | 0.26759400  | 0.82493100  | -1.78095800 |
| C | 1.98127000  | -1.54274400 | 3.33975400  | N | 1.88050000  | -0.00001800 | 0.00001500  |
| H | 4.52409800  | -0.87748400 | 1.88930700  | N | 0.26754900  | -0.82494200 | 1.78096300  |
| H | -1.72369700 | -1.09577200 | 2.36111300  | C | -0.36583000 | -1.80009400 | 3.88851700  |
| H | 1.25825300  | -2.39956400 | 5.19283000  | H | -1.16499000 | -2.10806700 | 4.55203400  |
| H | 3.02968200  | -1.65592200 | 3.58895000  | C | 0.36539100  | -3.88907700 | -1.79986200 |
| C | -0.68968700 | 1.22663800  | -2.64688600 | H | 1.16440700  | -4.55285600 | -2.10764100 |
| C | -0.36572900 | 1.80010200  | -3.88852200 | C | 3.93683800  | 0.49375400  | -1.06434600 |
| C | 0.98322500  | 1.96027000  | -4.24038200 | N | 4.61629500  | -0.00004100 | 0.00003700  |
| C | 1.98135800  | 1.54270800  | -3.33971600 | N | -4.61609500 | 0.00005400  | -0.00003200 |
| C | 1.60048500  | 0.97911800  | -2.11789100 | C | -3.93661700 | 1.06446100  | 0.49373300  |
| H | -1.72363300 | 1.09578100  | -2.36114700 | H | 4.52417600  | 0.87738500  | -1.88925300 |
| H | -1.16482600 | 2.10808200  | -4.55207000 | H | -4.52392500 | 1.88942300  | 0.87732600  |
| H | 1.25839400  | 2.39954100  | -5.19280500 |   |             |             |             |

## Part 2

### Cartesian coordinates of the optimized structures for classic and new designed redox mediators in vacuum at B3LYP/LANL2DZ level.

|        |             |             |             |   |             |             |             |
|--------|-------------|-------------|-------------|---|-------------|-------------|-------------|
| [C1]2+ |             |             |             | H | 0.98608000  | -0.01400600 | 5.11208000  |
| Co     | -0.07444500 | -0.00000600 | 0.00000100  | H | -1.45207600 | -0.01553900 | 5.75724200  |
| C      | -2.62761200 | -0.00326400 | 1.19348900  | H | -3.17989900 | -0.01066000 | 3.95253700  |
| C      | -2.62763600 | 0.00322500  | -1.19343700 | C | 0.55238800  | 0.00828700  | -2.99532700 |
| C      | -4.03392900 | 0.00330400  | -1.22127000 | C | 0.20681300  | 0.01193300  | -4.35758100 |
| C      | -4.73472500 | -0.00002700 | 0.00004600  | C | -1.15355800 | 0.01277700  | -4.71363400 |
| C      | -4.03390500 | -0.00335800 | 1.22134900  | C | -2.12590500 | 0.00997300  | -3.69713300 |
| C      | -1.71354600 | -0.00639600 | 2.35505700  | C | -1.71359200 | 0.00637200  | -2.35502200 |
| C      | 0.55244600  | -0.00827700 | 2.99531900  | H | 1.59033400  | 0.00758700  | -2.68500600 |
| C      | 0.20689700  | -0.01192200 | 4.35757900  | H | 0.98598200  | 0.01403200  | -5.11209700 |
| C      | -1.15346700 | -0.01278800 | 4.71365800  | H | -1.45218700 | 0.01552800  | -5.75721200 |
| C      | -2.12583400 | -0.01000000 | 3.69717600  | H | -3.17997500 | 0.01061800  | -3.95247500 |
| H      | -4.57503700 | 0.00589000  | -2.16048100 | N | -0.37976400 | 0.00551000  | -2.01351300 |
| H      | -5.82020100 | -0.00003200 | 0.00005700  | N | -1.96951600 | -0.00001800 | 0.00002000  |
| H      | -4.57499500 | -0.00594700 | 2.16057100  | N | -0.37972400 | -0.00551500 | 2.01352300  |
| H      | 1.59038600  | -0.00756100 | 2.68497800  | C | 2.54662600  | -1.19235500 | -0.00306300 |

|        |             |             |             |   |             |             |             |
|--------|-------------|-------------|-------------|---|-------------|-------------|-------------|
| C      | 2.54660700  | 1.19239100  | 0.00303100  | C | 4.63837100  | 0.00008200  | 0.00042300  |
| C      | 3.95473900  | 1.21545700  | 0.00306200  | C | 3.94088900  | -0.86711400 | 0.86797500  |
| C      | 4.65917800  | 0.00003400  | -0.00001500 | C | 1.59667500  | -1.65364100 | 1.65347800  |
| C      | 3.95475900  | -1.21540000 | -0.00309000 | C | -0.69675000 | -2.06554800 | 2.06619100  |
| C      | 1.69327600  | -2.40915000 | -0.00617000 | C | -0.38116500 | -3.03392100 | 3.03429100  |
| C      | -0.51249200 | -3.21697900 | -0.00793700 | C | 0.96963800  | -3.31069000 | 3.31069800  |
| C      | -0.07361000 | -4.55311400 | -0.01153200 | C | 1.96941600  | -2.60900300 | 2.60873300  |
| C      | 1.31026500  | -4.80572500 | -0.01253400 | H | 4.48647500  | 1.52981000  | -1.52996000 |
| C      | 2.20560800  | -3.72110000 | -0.00981600 | H | 5.72424000  | 0.00009800  | 0.00051300  |
| H      | 4.49580800  | 2.15373700  | 0.00541200  | H | 4.48626600  | -1.52964200 | 1.53078500  |
| H      | 5.74468500  | 0.00004300  | -0.00001200 | H | -1.72841700 | -1.83336300 | 1.83499600  |
| H      | 4.49584200  | -2.15367100 | -0.00543400 | H | -1.17954500 | -3.55298500 | 3.55377600  |
| H      | -1.57163100 | -2.97912000 | -0.00708700 | H | 1.24124000  | -4.05398400 | 4.05391400  |
| H      | -0.79437500 | -5.36382100 | -0.01350000 | H | 3.01661300  | -2.80947300 | 2.80875700  |
| H      | 1.68594800  | -5.82420900 | -0.01531300 | C | -0.69647000 | 2.06568700  | -2.06608500 |
| H      | 3.27349000  | -3.90728500 | -0.01057300 | C | -0.38075800 | 3.03413300  | -3.03407100 |
| C      | -0.51254100 | 3.21696900  | 0.00793000  | C | 0.97008100  | 3.31091200  | -3.31029200 |
| C      | -0.07368000 | 4.55311100  | 0.01150200  | C | 1.96976800  | 2.60918400  | -2.60824000 |
| C      | 1.31019300  | 4.80574300  | 0.01246200  | C | 1.59690100  | 1.65376200  | -1.65309200 |
| C      | 2.20555200  | 3.72113100  | 0.00975500  | H | -1.72816500 | 1.83347600  | -1.83504700 |
| C      | 1.69323800  | 2.40917300  | 0.00613800  | H | -1.17907000 | 3.55323700  | -3.55362200 |
| H      | -1.57167700 | 2.97909400  | 0.00710800  | H | 1.24178000  | 4.05424700  | -4.05343200 |
| H      | -0.79445600 | 5.36380800  | 0.01347600  | H | 3.01699200  | 2.80967100  | -2.80810800 |
| H      | 1.68586000  | 5.82423200  | 0.01522100  | N | 0.26467700  | 1.39029200  | -1.38996200 |
| H      | 3.27343100  | 3.90733100  | 0.01048800  | N | 1.89034100  | 0.00004800  | 0.00020100  |
| N      | 0.34603100  | 2.17223700  | 0.00529400  | N | 0.26448300  | -1.39020000 | 1.39014400  |
| N      | 1.87595800  | 0.00001300  | -0.00001600 | C | -2.53518000 | 0.84785200  | 0.84762500  |
| N      | 0.34606500  | -2.17223400 | -0.00529900 | C | -2.53488300 | -0.84819900 | -0.84818400 |
|        |             |             |             | C | -3.94079800 | -0.86790700 | -0.86758700 |
| [C1]3+ |             |             |             | C | -4.63837100 | -0.00031700 | -0.00050300 |
| Co     | -0.00000100 | -0.00002100 | 0.00000500  | C | -3.94109900 | 0.86737200  | 0.86672600  |
| C      | 2.53497200  | -0.84787400 | 0.84825100  | C | -1.59707400 | 1.65322700  | 1.65346800  |
| C      | 2.53509100  | 0.84799000  | -0.84774300 | C | 0.69625800  | 2.06622100  | 2.06562200  |
| C      | 3.94100900  | 0.86726300  | -0.86724100 | C | 0.38044900  | 3.03425900  | 3.03398300  |

|        |             |             |             |   |             |             |             |
|--------|-------------|-------------|-------------|---|-------------|-------------|-------------|
| C      | -0.97041900 | 3.31049700  | 3.31061000  | H | 1.29915900  | -3.69717200 | -0.24510700 |
| C      | -1.97003600 | 2.60842200  | 2.60880600  | H | -0.66457400 | -5.62572000 | -0.23726100 |
| H      | -4.48610400 | -1.53072800 | -1.53016100 | H | -3.00647100 | -4.23083800 | -0.11922300 |
| H      | -5.72424000 | -0.00038800 | -0.00062200 | C | -1.78332900 | 2.23184200  | 0.04951800  |
| H      | -4.48663500 | 1.53013100  | 1.52917500  | C | -2.34122400 | 3.52343700  | 0.11097600  |
| H      | 1.72797600  | 1.83516000  | 1.83353400  | C | -1.48509800 | 4.63903500  | 0.12615800  |
| H      | 1.17870900  | 3.55383000  | 3.55314800  | C | -0.09374800 | 4.43665600  | 0.08091800  |
| H      | -1.24219000 | 4.05366700  | 4.05388800  | C | 0.39193300  | 3.11816900  | 0.02039100  |
| H      | -3.01728000 | 2.80830600  | 2.80917300  | C | -2.59567300 | 0.98847000  | 0.02748200  |
| C      | 0.69696300  | -2.06601100 | -2.06565600 | C | -4.00025200 | 0.95843300  | 0.05116500  |
| C      | 0.38147500  | -3.03406400 | -3.03410900 | C | -4.66076700 | -0.28433800 | 0.02188600  |
| C      | -0.96930000 | -3.31052800 | -3.31095600 | C | -3.92131900 | -1.47448200 | -0.03227600 |
| C      | -1.96914800 | -2.60863900 | -2.60929400 | C | -2.51815900 | -1.37756000 | -0.05387200 |
| C      | -1.59650200 | -1.65340900 | -1.65386800 | H | -3.41454700 | 3.67064000  | 0.14667000  |
| H      | 1.72860600  | -1.83479400 | -1.83339200 | H | -1.89628500 | 5.64260000  | 0.17253600  |
| H      | 1.17990800  | -3.55347600 | -3.55316600 | H | 0.59770300  | 5.27241900  | 0.09144500  |
| H      | -1.24082800 | -4.05372500 | -4.05429600 | H | 1.45863800  | 2.92026700  | -0.01480400 |
| H      | -3.01632500 | -2.80869700 | -2.80983500 | H | -4.57633300 | 1.87431100  | 0.08946800  |
| N      | -0.26433800 | -1.39004600 | -1.39032100 | H | -5.74531700 | -0.32402000 | 0.03882500  |
| N      | -1.89033900 | -0.00013700 | -0.00020600 | H | -4.42222300 | -2.43450000 | -0.05938400 |
| N      | -0.26482300 | 1.39007300  | 1.39015700  | C | -0.42719800 | -0.00148000 | -3.26662800 |
|        |             |             |             | C | 0.45108400  | 0.05496100  | -4.39105100 |
| [C2]2+ |             |             |             | C | 1.73878100  | 0.06545200  | -3.86992300 |
| Co     | 0.07922600  | -0.09643600 | -0.10488600 | N | 1.62022800  | 0.01702900  | -2.49273800 |
| N      | -0.42910400 | 2.04355600  | 0.00377200  | H | -1.50650300 | -0.02444300 | -3.25964500 |
| N      | 0.51659900  | -0.16234100 | 1.86804300  | H | 0.17486800  | 0.08324600  | -5.43336900 |
| N      | -1.87900500 | -0.18073700 | -0.02156600 | H | 2.69458900  | 0.10301700  | -4.36997300 |
| N      | 1.97707900  | -0.04231600 | -0.22809700 | C | 1.86917600  | -0.13867700 | 2.13096900  |
| N      | 0.26952900  | -0.02520900 | -2.11609200 | C | 2.36058600  | -0.17395100 | 3.44530200  |
| N      | -0.29442400 | -2.31835800 | -0.15286700 | C | 1.45050600  | -0.23445300 | 4.51657300  |
| C      | 0.22902000  | -3.55577100 | -0.20598500 | C | 0.07180200  | -0.25709700 | 4.24080800  |
| C      | -0.79395800 | -4.55530500 | -0.20180900 | C | -0.35497600 | -0.21922700 | 2.90219000  |
| C      | -1.99286800 | -3.86239100 | -0.14242300 | C | 2.71371900  | -0.07658600 | 0.91994300  |
| N      | -1.68130000 | -2.50972900 | -0.11281800 | C | 4.11618500  | -0.05748300 | 0.85083200  |

|        |             |             |             |   |             |             |             |
|--------|-------------|-------------|-------------|---|-------------|-------------|-------------|
| C      | 4.73051500  | -0.00619900 | -0.41799900 | C | -3.83263100 | -1.14843900 | 1.17947500  |
| C      | 3.95673900  | 0.02285600  | -1.59339300 | C | -2.44056000 | -1.05169100 | 1.04010900  |
| C      | 2.56182200  | 0.00166600  | -1.44639500 | H | -3.31833100 | 2.62387500  | -2.50680300 |
| H      | 3.42790200  | -0.15499200 | 3.63696600  | H | -1.68156700 | 3.93831700  | -3.86628500 |
| H      | 1.81035600  | -0.26311700 | 5.54021400  | H | 0.78451400  | 3.51219900  | -3.55636400 |
| H      | -0.66080900 | -0.30357300 | 5.03923200  | H | 1.51760900  | 1.79091500  | -1.90819400 |
| H      | -1.40957900 | -0.23500000 | 2.65423500  | H | -4.65379400 | 1.25391100  | -1.13962700 |
| H      | 4.72240900  | -0.08446500 | 1.74854900  | H | -5.70287700 | -0.34462200 | 0.45939900  |
| H      | 5.81332700  | 0.00825100  | -0.49206600 | H | -4.29381800 | -1.84648500 | 1.86936300  |
| H      | 4.42759000  | 0.05773800  | -2.56897300 | C | -0.63114400 | -2.27748300 | -2.20398900 |
|        |             |             |             | C | 0.19413500  | -3.06768700 | -3.05351100 |
| [C2]3+ |             |             |             | C | 1.50735300  | -2.71741700 | -2.75727000 |
| Co     | 0.00003100  | -0.12353400 | -0.00160000 | N | 1.46212800  | -1.75359700 | -1.76720000 |
| N      | -0.42258900 | 1.27678600  | -1.32393200 | H | -1.70945800 | -2.26788500 | -2.14282600 |
| N      | 0.42233300  | 1.24223500  | 1.35645900  | H | -0.13226200 | -3.79396200 | -3.78231300 |
| N      | -1.88567500 | -0.17199200 | 0.17419700  | H | 2.43594300  | -3.08013200 | -3.17419700 |
| N      | 1.88574600  | -0.16709100 | -0.17850000 | C | 1.77972900  | 1.46177500  | 1.51765000  |
| N      | 0.12668300  | -1.48035800 | -1.42297300 | C | 2.25251800  | 2.39276500  | 2.45260200  |
| N      | -0.12634000 | -1.51667000 | 1.38427600  | C | 1.33044600  | 3.11392900  | 3.23693800  |
| C      | 0.63164300  | -2.33362300 | 2.14438100  | C | -0.04557700 | 2.88283400  | 3.06094100  |
| C      | -0.19348100 | -3.14570400 | 2.97316900  | C | -0.46464300 | 1.93741700  | 2.10917200  |
| C      | -1.50676600 | -2.78814500 | 2.68608000  | C | 2.62927000  | 0.64027100  | 0.63339700  |
| N      | -1.46172700 | -1.79895100 | 1.72135400  | C | 4.02913100  | 0.59861600  | 0.54493400  |
| H      | 1.70995200  | -2.32230800 | 2.08343500  | C | 4.62105300  | -0.28657700 | -0.38541700 |
| H      | 0.13305400  | -3.89055700 | 3.68290700  | C | 3.83291100  | -1.11705300 | -1.20843100 |
| H      | -2.43528600 | -3.16173300 | 3.09345000  | C | 2.44081400  | -1.02407300 | -1.06678200 |
| C      | -1.78004200 | 1.50012200  | -1.47935900 | H | 3.31771300  | 2.55930100  | 2.57351600  |
| C      | -2.25309000 | 2.45462400  | -2.39015800 | H | 1.68058500  | 3.83812700  | 3.96612900  |
| C      | -1.33122700 | 3.19582300  | -3.15583100 | H | -0.78539100 | 3.41945700  | 3.64535400  |
| C      | 0.04485400  | 2.96063200  | -2.98584200 | H | -1.51801200 | 1.74075200  | 1.95355900  |
| C      | 0.46418600  | 1.99126800  | -2.05860300 | H | 4.65356200  | 1.22473500  | 1.17199400  |
| C      | -2.62938400 | 0.65599300  | -0.61648500 | H | 5.70298700  | -0.33191600 | -0.46761100 |
| C      | -4.02922900 | 0.61187900  | -0.52900900 | H | 4.29425300  | -1.79701400 | -1.91605000 |
| C      | -4.62095500 | -0.29707100 | 0.37827400  |   |             |             |             |

|        |             |             |             |             |                                     |
|--------|-------------|-------------|-------------|-------------|-------------------------------------|
| [C3]2+ | H           | 4.06048500  | 1.24343900  | -3.35718600 |                                     |
| Co     | 0.00001600  | 0.00231000  | -0.00002700 | H           | 1.68376600 1.31797000 -2.55844000   |
| C      | 0.40173800  | 2.75811300  | 0.61934300  | H           | 3.92239700 -3.06738100 1.00812000   |
| C      | 0.83430300  | 3.92121100  | 1.28198100  | H           | 2.82152000 -4.32945900 2.84756900   |
| C      | 1.59324900  | 3.80545700  | 2.45829100  | H           | 0.46734400 -3.70257400 3.52004700   |
| C      | 1.90060400  | 2.52241600  | 2.94655000  | H           | -0.66422000 -1.83252300 2.30231500  |
| C      | 1.44257400  | 1.40078700  | 2.23880100  | N           | 1.95575600 -0.10538200 -1.06440200  |
| C      | -0.40177700 | 2.75807800  | -0.61944000 | N           | 0.94282300 -1.43520700 1.04298200   |
| C      | -0.83437900 | 3.92113700  | -1.28212200 | C           | -2.81742500 -0.95816700 0.43329400  |
| C      | -1.59333300 | 3.80531400  | -2.45842000 | C           | -4.16993000 -1.04870800 0.82069200  |
| C      | -1.90066000 | 2.52224500  | -2.94662500 | C           | -4.63479600 -0.25350900 1.88263900  |
| C      | -1.44259200 | 1.40065800  | -2.23883600 | C           | -3.73952100 0.61686200 2.53184200   |
| H      | 0.58722000  | 4.90253900  | 0.89412100  | C           | -2.40736000 0.66138200 2.08638600   |
| H      | 1.93463500  | 4.69372400  | 2.98049200  | C           | -2.22537200 -1.75792700 -0.67090000 |
| H      | 2.48205300  | 2.38761700  | 3.85214600  | C           | -2.91686800 -2.80438400 -1.31369400 |
| H      | 1.65989000  | 0.40015900  | 2.58734900  | C           | -2.29585800 -3.52121300 -2.34874000 |
| H      | -0.58731900 | 4.90248700  | -0.89430500 | C           | -0.98451800 -3.17705900 -2.72461800 |
| H      | -1.93474700 | 4.69355100  | -2.98065500 | C           | -0.34365600 -2.13178300 -2.04525500 |
| H      | -2.48211500 | 2.38739500  | -3.85220900 | H           | -4.85682000 -1.71321800 0.30965900  |
| H      | -1.65988000 | 0.40000700  | -2.58733800 | H           | -5.67319100 -0.31112600 2.19410100  |
| N      | 0.71098500  | 1.50900200  | 1.09941200  | H           | -4.06057200 1.24364200 3.35697300   |
| N      | -0.71099300 | 1.50894100  | -1.09945900 | H           | -1.68383300 1.31812300 2.55828200   |
| C      | 2.81743300  | -0.95812800 | -0.43328300 | H           | -3.92231300 -3.06761100 -1.00788200 |
| C      | 4.16992700  | -1.04869200 | -0.82071000 | H           | -2.82139600 -4.32985000 -2.84719500 |
| C      | 4.63476000  | -0.25358100 | -1.88273800 | H           | -0.46724100 -3.70296100 -3.51974100 |
| C      | 3.73946100  | 0.61672700  | -2.53199200 | H           | 0.66426200 -1.83274200 -2.30221000  |
| C      | 2.40731100  | 0.66127500  | -2.08650700 | N           | -1.95577200 -0.10536000 1.06436000  |
| C      | 2.22541200  | -1.75779100 | 0.67099600  | N           | -0.94279400 -1.43534400 -1.04291600 |
| C      | 2.91694300  | -2.80415600 | 1.31390300  |             |                                     |
| C      | 2.29595600  | -3.52089200 | 2.34902600  | [C3]3+      |                                     |
| C      | 0.98460500  | -3.17674000 | 2.72486800  | Co          | 0.00025000 -0.00022400 -0.00031900  |
| C      | 0.34370800  | -2.13155900 | 2.04539400  | C           | -0.59007100 2.70390800 0.57560700   |
| H      | 4.85683500  | -1.71315500 | -0.30964100 | C           | -0.53488000 3.97153500 1.17974800   |
| H      | 5.67314600  | -0.31121800 | -2.19422400 | C           | 0.31832800 4.17973000 2.27826900    |



|   |             |             |             |        |             |             |             |
|---|-------------|-------------|-------------|--------|-------------|-------------|-------------|
| C | 1.09874600  | 3.10724800  | 2.74968900  | H      | 0.09182700  | -1.88882000 | 2.45220500  |
| C | 1.00689900  | 1.86408600  | 2.10614000  | N      | 1.57467400  | 0.57068600  | -1.04476500 |
| C | -1.44282400 | 2.36181200  | -0.57634000 | N      | 1.35220300  | -0.98947000 | 1.04356900  |
| C | -2.35969100 | 3.23952300  | -1.17972600 | C      | -2.04684500 | -1.86293000 | 0.57746500  |
| C | -3.12027900 | 2.80028700  | -2.27821300 | C      | -3.17228100 | -2.44825400 | 1.18218500  |
| C | -2.94223000 | 1.48619200  | -2.75030700 | C      | -3.77850200 | -1.81280700 | 2.28075700  |
| C | -2.01595400 | 0.65151300  | -2.10742300 | C      | -3.23946500 | -0.60063800 | 2.75127700  |
| H | -1.14074700 | 4.78888900  | 0.80593300  | C      | -2.11695200 | -0.05928400 | 2.10711500  |
| H | 0.37168100  | 5.15417200  | 2.75410700  | C      | -1.32518100 | -2.43065200 | -0.57497600 |
| H | 1.76625000  | 3.22520500  | 3.59660100  | C      | -1.62859900 | -3.66268700 | -1.17900400 |
| H | 1.59170700  | 1.02252300  | 2.45008500  | C      | -0.86891100 | -4.10217000 | -2.27797400 |
| H | -2.48715000 | 4.24865200  | -0.80525600 | C      | 0.18122900  | -3.29226100 | -2.74973800 |
| H | -3.83288100 | 3.46739200  | -2.75358100 | C      | 0.44268200  | -2.07343300 | -2.10619500 |
| H | -3.50604500 | 1.11017600  | -3.59734900 | H      | -3.57784600 | -3.38138900 | 0.80849400  |
| H | -1.85664100 | -0.36042500 | -2.45237900 | H      | -4.64900600 | -2.25336200 | 2.75712800  |
| N | 0.18187800  | 1.66495700  | 1.04297000  | H      | -3.67475600 | -0.08110000 | 3.59823700  |
| N | -1.28210800 | 1.07767900  | -1.04412800 | H      | -1.68047300 | 0.86803400  | 2.45052000  |
| C | 2.76738800  | 0.06768500  | -0.57746500 | H      | -2.43927700 | -4.27711400 | -0.80458600 |
| C | 3.98548100  | 0.42207900  | -1.18209400 | H      | -1.09178400 | -5.05229700 | -2.75376800 |
| C | 3.98476500  | 1.29989800  | -2.28095200 | H      | 0.78817700  | -3.59276100 | -3.59710700 |
| C | 2.75761400  | 1.80326400  | -2.75209800 | H      | 1.24037600  | -1.43050800 | -2.45067700 |
| C | 1.57199900  | 1.41919800  | -2.10809800 | N      | -1.53240900 | -0.67492100 | 1.04420800  |
| C | 2.63781900  | -0.84063400 | 0.57566200  | N      | -0.29269300 | -1.65027900 | -1.04283100 |
| C | 3.70831700  | -1.52151700 | 1.18010600  |        |             |             |             |
| C | 3.46256200  | -2.36335500 | 2.27960400  | [Z1]2+ |             |             |             |
| C | 2.14380900  | -2.50288300 | 2.75147000  | Co     | -0.07674400 | -0.01350700 | -0.00120300 |
| C | 1.11274300  | -1.80273000 | 2.10750400  | C      | -2.66924500 | -0.16935900 | -1.09693900 |
| H | 4.92342700  | 0.02824200  | -0.80790000 | C      | -2.58720200 | -0.16674800 | 1.28634000  |
| H | 4.91855700  | 1.58314900  | -2.75697800 | C      | -3.98716600 | -0.24008400 | 1.36955900  |
| H | 2.71350400  | 2.47955300  | -3.59910700 | C      | -4.73153400 | -0.27838900 | 0.17304500  |
| H | 0.61578300  | 1.78806400  | -2.45160900 | C      | -4.07545600 | -0.24341900 | -1.07134600 |
| H | 4.71890500  | -1.40594400 | 0.80559800  | C      | -1.79982000 | -0.11727600 | -2.29105800 |
| H | 4.28002300  | -2.89619000 | 2.75568000  | C      | 0.43785200  | 0.01489200  | -3.01329600 |
| H | 1.91256100  | -3.13898300 | 3.59919300  | C      | 0.04288400  | -0.00982500 | -4.36206700 |

|   |             |             |             |        |             |             |             |
|---|-------------|-------------|-------------|--------|-------------|-------------|-------------|
| C | -1.32706700 | -0.09037000 | -4.66846200 | C      | -0.26059900 | -3.25358800 | -0.00292200 |
| C | -2.26025600 | -0.14543500 | -3.61680900 | C      | 0.28108700  | -4.55177000 | -0.01807700 |
| H | -4.49184400 | -0.26464400 | 2.32886300  | C      | 1.67963900  | -4.69612000 | -0.05267700 |
| H | -5.81485300 | -0.33295400 | 0.21197300  | C      | 2.48761000  | -3.54480300 | -0.07241900 |
| H | -4.64965900 | -0.27053700 | -1.99036600 | C      | 1.87528200  | -2.27702000 | -0.05597300 |
| H | 1.48507400  | 0.07649600  | -2.74235000 | H      | -1.33493500 | -3.10030100 | 0.02346800  |
| H | 0.79257200  | 0.03375000  | -5.14468100 | H      | -0.37430800 | -5.41603800 | -0.00232400 |
| H | -1.66293700 | -0.10991200 | -5.70043400 | H      | 2.13344400  | -5.68215400 | -0.06367800 |
| H | -3.32103600 | -0.20821000 | -3.83366300 | H      | 3.56633800  | -3.64840600 | -0.09872900 |
| C | 0.63973000  | 0.01206100  | 2.98158600  | N      | 0.51348600  | -2.14461200 | -0.02044300 |
| C | -0.90080000 | -0.07744900 | 4.70192100  | N      | 1.87343900  | 0.13862700  | -0.05923300 |
| C | -1.95996500 | -0.13527800 | 3.77328900  | N      | 0.18458400  | 2.18642700  | -0.01073600 |
| C | -1.62970100 | -0.11346500 | 2.41031100  | N      | 0.39651800  | -0.00547900 | 4.30781700  |
| H | 1.67505500  | 0.06869000  | 2.66979500  | N      | -0.44152200 | 4.50519400  | -0.00364800 |
| H | -1.08179300 | -0.08859400 | 5.77207100  |        |             |             |             |
| H | -2.98607700 | -0.19324500 | 4.11669500  | [Z1]3+ |             |             |             |
| N | -0.31039400 | -0.03643600 | 2.01584100  | Co     | -0.00001700 | 0.01040200  | 0.00003600  |
| N | -1.96977700 | -0.13438800 | 0.07093300  | C      | -2.60054000 | 0.83004700  | 0.65728500  |
| N | -0.45623800 | -0.03625600 | -1.99788100 | C      | -2.46792100 | -0.86906400 | -1.02731200 |
| C | 2.45605700  | 1.37676900  | -0.06828900 | C      | -3.86655600 | -0.91481500 | -1.13953200 |
| C | 2.63203500  | -0.99828000 | -0.07363100 | C      | -4.63409900 | -0.05532800 | -0.32135800 |
| C | 4.03957200  | -0.91186200 | -0.09877600 | C      | -4.00738500 | 0.82440400  | 0.58424000  |
| C | 4.65081000  | 0.35174900  | -0.10809700 | C      | -1.73246100 | 1.64929200  | 1.52561900  |
| C | 3.85511100  | 1.51148200  | -0.09292000 | C      | 0.52148900  | 2.09310100  | 2.09798300  |
| C | 1.51195900  | 2.52379600  | -0.04613500 | C      | 0.12466100  | 3.05957600  | 3.03835100  |
| C | -0.72876700 | 3.18537400  | 0.00775400  | C      | -1.24576800 | 3.31768400  | 3.21870800  |
| C | 0.87287800  | 4.84534100  | -0.03603100 | C      | -2.18441700 | 2.60133000  | 2.44945900  |
| C | 1.89658000  | 3.87661400  | -0.05923400 | H      | -4.35654300 | -1.59153400 | -1.83120500 |
| H | 4.65015900  | -1.80644500 | -0.10752700 | H      | -5.71771200 | -0.07531700 | -0.38927200 |
| H | 5.73299900  | 0.43372300  | -0.12445400 | H      | -4.60539100 | 1.47739700  | 1.21031900  |
| H | 4.32102800  | 2.48965500  | -0.09711700 | H      | 1.57047300  | 1.87640600  | 1.94045200  |
| H | -1.77756700 | 2.91078000  | 0.03335600  | H      | 0.87712500  | 3.59137100  | 3.61097700  |
| H | 1.09731100  | 5.90736200  | -0.04337200 | H      | -1.57912600 | 4.05794900  | 3.93956100  |
| H | 2.93341300  | 4.18892500  | -0.08547200 | H      | -3.24563100 | 2.78815200  | 2.57537200  |

|   |             |             |             |        |             |             |             |
|---|-------------|-------------|-------------|--------|-------------|-------------|-------------|
| C | 0.84288000  | -2.06072200 | -2.02572200 | N      | 0.38004600  | 1.39583600  | -1.36560300 |
| C | -0.62549000 | -3.28853400 | -3.32950800 | N      | 1.88825400  | -0.00569600 | 0.14406800  |
| C | -1.72965500 | -2.63269200 | -2.73920600 | N      | 0.15723000  | -1.37609900 | 1.40968600  |
| C | -1.46480000 | -1.66561800 | -1.76150100 | N      | 0.65088800  | -2.99781700 | -2.97075300 |
| H | 1.86628700  | -1.83955000 | -1.75055000 | N      | -0.64930500 | -2.98399900 | 2.98494300  |
| H | -0.75433100 | -4.05006300 | -4.09291200 |        |             |             |             |
| H | -2.73999400 | -2.88147500 | -3.04336600 | [Z2]2+ |             |             |             |
| N | -0.15637600 | -1.38267300 | -1.40330700 | Co     | -0.07975200 | 0.00638500  | 0.00300300  |
| N | -1.88825100 | -0.00749900 | -0.14389300 | C      | -2.62824200 | -0.29044300 | 1.18149100  |
| N | -0.38079100 | 1.40202900  | 1.35912200  | C      | -2.64774400 | -0.01527600 | -1.17857900 |
| C | 2.46843800  | -0.86292900 | 1.03137200  | C      | -4.04478600 | -0.10448000 | -1.23430600 |
| C | 2.60009600  | 0.82820300  | -0.66129400 | C      | -4.74144500 | -0.29447800 | -0.02123900 |
| C | 4.00695800  | 0.82336200  | -0.58856200 | C      | -4.03574300 | -0.38888900 | 1.19353300  |
| C | 4.63418700  | -0.05179300 | 0.32109900  | C      | -1.71015700 | -0.36894500 | 2.33738500  |
| C | 3.86711200  | -0.90766000 | 1.14349500  | C      | 0.55730700  | -0.30964200 | 2.97507000  |
| C | 1.46577000  | -1.65654400 | 1.76938100  | C      | 0.21885300  | -0.48204100 | 4.32870000  |
| C | -0.84171600 | -2.05168100 | 2.03527000  | C      | -1.13696200 | -0.60063000 | 4.68146000  |
| C | 0.62721700  | -3.27233400 | 3.34512000  | C      | -2.11406500 | -0.54250700 | 3.66999700  |
| C | 1.73107100  | -2.61871200 | 2.75177900  | H      | -4.55341600 | -0.02907500 | -2.18918900 |
| H | 4.60457000  | 1.47352800  | -1.21795700 | H      | -5.82419800 | -0.36991800 | -0.02464400 |
| H | 5.71782200  | -0.07109900 | 0.38884900  | H      | -4.57370800 | -0.53783000 | 2.12306000  |
| H | 4.35746300  | -1.58095800 | 1.83824700  | H      | 1.59264800  | -0.21385900 | 2.67009500  |
| H | -1.86521800 | -1.83248100 | 1.75890100  | H      | 1.00097700  | -0.52190200 | 5.07908600  |
| H | 0.75643100  | -4.02993900 | 4.11235500  | H      | -1.42910400 | -0.73530700 | 5.71811100  |
| H | 2.74152100  | -2.86542700 | 3.05725900  | H      | -3.16498300 | -0.63128000 | 3.92315200  |
| C | -0.52265700 | 2.08300800  | -2.10759900 | C      | 0.45083400  | 0.38902000  | -3.04508600 |
| C | -0.12639300 | 3.04531600  | -3.05246800 | C      | -1.28424300 | 0.47369700  | -4.55459600 |
| C | 1.24389500  | 3.30329000  | -3.23411700 | C      | -1.74458100 | 0.17430000  | -2.32633500 |
| C | 2.18296700  | 2.59097400  | -2.46165000 | H      | 1.51415500  | 0.42736500  | -2.84082400 |
| C | 1.73155400  | 1.64300900  | -1.53337100 | H      | -1.63068700 | 0.57734100  | -5.57663400 |
| H | -1.57152000 | 1.86644800  | -1.94912000 | N      | -0.40374300 | 0.20889100  | -2.00428900 |
| H | -0.87915500 | 3.57406300  | -3.62752100 | N      | -1.97676100 | -0.10674000 | 0.00232600  |
| H | 1.57683000  | 4.04035600  | -3.95843700 | N      | -0.37867800 | -0.25466700 | 1.99791100  |
| H | 3.24408200  | 2.77770800  | -2.58854200 | C      | 2.60754700  | -1.04021200 | -0.15329600 |

|        |             |             |             |   |             |             |             |
|--------|-------------|-------------|-------------|---|-------------|-------------|-------------|
| C      | 2.48458500  | 1.31477600  | 0.10272400  | C | 4.65237500  | -0.06919000 | -0.07641800 |
| C      | 3.89459300  | 1.39783700  | 0.07983100  | C | 3.97916800  | 0.80683400  | 0.79998800  |
| C      | 4.65817400  | 0.22753100  | -0.06291700 | C | 1.65332100  | 1.62803100  | 1.63600600  |
| C      | 4.00982000  | -1.01726300 | -0.18158400 | C | -0.63161800 | 2.06782500  | 2.08394600  |
| C      | -0.23119300 | -3.33489800 | -0.36618800 | C | -0.28804300 | 3.03362400  | 3.04614600  |
| C      | 1.69828100  | -4.57606200 | -0.49739400 | C | 1.07000500  | 3.29522300  | 3.30026100  |
| H      | 4.39154900  | 2.35636500  | 0.17042400  | C | 2.05127000  | 2.58007000  | 2.58382700  |
| H      | 5.74196500  | 0.28302000  | -0.08277500 | H | 4.41651100  | -1.61849100 | -1.61395800 |
| H      | 4.55384300  | -1.94809500 | -0.29462100 | H | 5.73808400  | -0.07812200 | -0.09948700 |
| H      | -1.31468700 | -3.28898800 | -0.35658700 | H | 4.54601700  | 1.46796500  | 1.44677200  |
| H      | 2.18786900  | -5.53842000 | -0.59540600 | H | -1.67051600 | 1.84864700  | 1.87151700  |
| C      | -0.67172200 | 3.16393200  | 0.35900600  | H | -1.07200900 | 3.56288300  | 3.57750100  |
| C      | -0.30042700 | 4.51299900  | 0.50486500  | H | 1.36195300  | 4.03707500  | 4.03736200  |
| C      | 1.06820800  | 4.83643200  | 0.51990200  | H | 3.10376400  | 2.76897200  | 2.76778900  |
| C      | 2.01809600  | 3.80657300  | 0.39029000  | C | -0.67671000 | -2.12707200 | -2.09237300 |
| C      | 1.57377900  | 2.47881100  | 0.24726100  | C | 0.98893100  | -3.26735300 | -3.20965200 |
| H      | -1.71783400 | 2.87464900  | 0.34366800  | C | 1.57002500  | -1.68156700 | -1.65117700 |
| H      | -1.06159600 | 5.27970000  | 0.60222900  | H | -1.73237300 | -1.95225600 | -1.92125100 |
| H      | 1.39134400  | 5.86687900  | 0.62978100  | H | 1.28305300  | -4.01208600 | -3.94204100 |
| H      | 3.07506200  | 4.04732500  | 0.40175100  | N | 0.23786900  | -1.40492400 | -1.38538800 |
| N      | 0.23885600  | 2.17124800  | 0.23208900  | N | 1.89585500  | -0.03388700 | -0.01129400 |
| N      | 1.87002400  | 0.10084900  | -0.01470500 | N | 0.31154300  | 1.38115600  | 1.39256300  |
| N      | 0.46577900  | -2.17350200 | -0.25784900 | C | -2.52664000 | 0.88556600  | -0.86637100 |
| N      | 0.05470200  | 0.52469700  | -4.32898100 | C | -2.56760700 | -0.80740600 | 0.81616300  |
| N      | 0.33861100  | -4.55470200 | -0.48695000 | C | -3.97957700 | -0.80619300 | 0.79885300  |
| C      | 1.82873900  | -2.29268600 | -0.27437800 | C | -4.65236000 | 0.06928200  | -0.07842400 |
| N      | 2.48149400  | -3.47132600 | -0.39299100 | C | -3.92461400 | 0.93488400  | -0.93052300 |
| N      | -2.21756200 | 0.30166700  | -3.58019800 | C | 0.67772500  | 2.12578600  | -2.09304800 |
|        |             |             |             | C | -0.98728700 | 3.26544800  | -3.21189000 |
| [Z2]3+ |             |             |             | H | -4.54673200 | -1.46681700 | 1.44589200  |
| Co     | 0.00001300  | -0.00009900 | 0.00945600  | H | -5.73805900 | 0.07829100  | -0.10193400 |
| C      | 2.56718400  | 0.80791100  | 0.81673800  | H | -4.41571500 | 1.61758400  | -1.61685700 |
| C      | 2.52705500  | -0.88618400 | -0.86469400 | H | 1.73330600  | 1.95111800  | -1.92127900 |
| C      | 3.92505100  | -0.93542000 | -0.92825100 | H | -1.28105100 | 4.00967000  | -3.94494200 |

|        |             |             |             |   |             |             |             |
|--------|-------------|-------------|-------------|---|-------------|-------------|-------------|
| C      | 0.63058300  | -2.06655700 | 2.08561300  | H | -0.27440100 | 3.68474400  | 3.78150700  |
| C      | 0.28658100  | -3.03172400 | 3.04830200  | H | -2.60034100 | 2.72252800  | 4.41414600  |
| C      | -1.07158100 | -3.29311100 | 3.30201900  | H | -4.03252500 | 1.70360300  | 2.55103800  |
| C      | -2.05253300 | -2.57841700 | 2.58470000  | C | 1.25138500  | -1.96831700 | -2.13974300 |
| C      | -1.65416800 | -1.62702300 | 1.63641800  | C | 1.19898500  | -3.01105100 | -3.07987000 |
| H      | 1.66957500  | -1.84758300 | 1.87345800  | C | -0.03825800 | -3.62946000 | -3.33589700 |
| H      | 1.07030300  | -3.56067700 | 3.58032000  | C | -1.18076600 | -3.18860700 | -2.64468500 |
| H      | -1.36387000 | -4.03449200 | 4.03945900  | C | -1.05839400 | -2.14148900 | -1.71476800 |
| H      | -3.10511200 | -2.76720200 | 2.76831700  | H | 2.18592400  | -1.46653200 | -1.91621200 |
| N      | -0.31228900 | -1.38033100 | 1.39339300  | H | 2.10214400  | -3.32487100 | -3.59194200 |
| N      | -1.89585000 | 0.03372300  | -0.01221500 | H | -0.11341000 | -4.43731800 | -4.05702100 |
| N      | -0.23722100 | 1.40406100  | -1.38619000 | H | -2.14036500 | -3.65668500 | -2.83299800 |
| N      | -0.33894100 | -3.05830600 | -3.00440200 | N | 0.15246200  | -1.54182600 | -1.47332700 |
| N      | 0.34045700  | 3.05655200  | -3.00578600 | N | -1.83314200 | -0.57114900 | -0.07799900 |
| C      | -1.56924900 | 1.68053700  | -1.65284800 | C | 2.74856900  | -0.01804400 | 0.74801700  |
| N      | -1.97010700 | 2.59269900  | -2.54881400 | C | 2.18196400  | 1.59914900  | -0.91649600 |
| N      | 1.97137000  | -2.59426200 | -2.54641300 | C | 3.50472900  | 2.06279800  | -0.96116800 |
|        |             |             |             | C | 4.46558200  | 1.45926700  | -0.12556600 |
| [Z3]2+ |             |             |             | C | 4.09138200  | 0.41991900  | 0.73699500  |
| Co     | 0.00000000  | 0.00001400  | -0.10626100 | C | 2.24428700  | -1.09016600 | 1.62481100  |
| C      | -2.74864100 | 0.01780200  | 0.74779100  | C | 0.18175200  | -2.20370600 | 2.31578800  |
| C      | -2.18187500 | -1.59891800 | -0.91712500 | C | 0.84410300  | -2.98253500 | 3.18063700  |
| C      | -3.50462200 | -2.06259600 | -0.96201400 | C | 2.34767600  | -2.92171900 | 3.36061000  |
| C      | -4.46555000 | -1.45932000 | -0.12631500 | C | 2.95911700  | -1.85476100 | 2.47977300  |
| C      | -4.09144600 | -0.42017900 | 0.73653900  | H | 3.79016700  | 2.87414000  | -1.61983300 |
| C      | -2.24444400 | 1.08969700  | 1.62491100  | H | 5.49434800  | 1.80501100  | -0.14398900 |
| C      | -0.18197500 | 2.20306600  | 2.31635600  | H | 4.82492800  | -0.03486800 | 1.39172900  |
| C      | -0.84439400 | 2.98162000  | 3.18139900  | H | -0.88581300 | -2.19643800 | 2.14489500  |
| C      | -2.34798600 | 2.92077000  | 3.36120700  | H | 0.27406400  | -3.68587000 | 3.78045400  |
| C      | -2.95934200 | 1.85401800  | 2.48006100  | H | 2.59991800  | -2.72370900 | 4.41362100  |
| H      | -3.78999000 | -2.87376500 | -1.62092300 | H | 4.03230700  | -1.70443100 | 2.55081700  |
| H      | -5.49430900 | -1.80507600 | -0.14491700 | C | -1.25119800 | 1.96900100  | -2.13925800 |
| H      | -4.82505300 | 0.03441900  | 1.39133400  | C | -1.19870400 | 3.01201900  | -3.07906500 |
| H      | 0.88560600  | 2.19584000  | 2.14556000  | C | 0.03858000  | 3.63045000  | -3.33483900 |

C 1.18102400 3.18936600 -2.64367000  
 C 1.05855400 2.14198100 -1.71406500  
 H -2.18576400 1.46716700 -1.91594600  
 H -2.10181700 3.32601700 -3.59111000  
 H 0.11380500 4.43852100 -4.05571600  
 H 2.14065100 3.65746600 -2.83178400  
 N -0.15233300 1.54227600 -1.47289900  
 N 1.83314700 0.57115300 -0.07768200  
 O -0.83316900 1.24080400 1.48165100  
 O 0.83300900 -1.24116300 1.48145500  
 H 2.80216700 -3.89922800 3.13597700  
 H -2.80244700 3.89833400 3.13674100

[Z3]3+

Co 0.00000000 -0.00000300 0.07950400  
 C 2.66214400 0.40504900 -0.79862600  
 C 2.34303400 -1.30239500 0.86215000  
 C 3.70985700 -1.60258200 0.86856000  
 C 4.56335000 -0.86823900 0.01071800  
 C 4.04948500 0.13544400 -0.82653800  
 C 1.95429500 1.40779900 -1.59703100  
 C -0.33353400 2.21923600 -2.10033400  
 C 0.15823700 3.12856600 -2.94810100  
 C 1.63313700 3.30699700 -3.22818700  
 C 2.46551100 2.31942000 -2.45090200  
 H 4.11603900 -2.37752100 1.50871200  
 H 5.62707800 -1.08607200 -0.00228900  
 H 4.70944300 0.68760000 -1.48602600  
 H -1.37359800 2.03460600 -1.88018800  
 H -0.55021700 3.76369800 -3.47327300  
 H 1.83427600 3.19390200 -4.30461100  
 H 3.54275200 2.34696200 -2.59722300  
 C -1.06353300 -1.87856200 2.09179400  
 C -0.93982900 -2.91468700 3.03048000

C 0.33035900 -3.46553700 3.28102500  
 C 1.44592300 -2.96173300 2.58510400  
 C 1.27062200 -1.92547800 1.65778000  
 H -2.02732100 -1.43544600 1.88085300  
 H -1.82236800 -3.27498100 3.54813400  
 H 0.45188800 -4.26817200 4.00202000  
 H 2.43270500 -3.37412600 2.76625600  
 N 0.01351800 -1.39779400 1.42055900  
 N 1.86707100 -0.31766300 0.03849700  
 C -2.66213800 -0.40510100 -0.79862800  
 C -2.34304600 1.30240600 0.86208600  
 C -3.70987200 1.60257600 0.86849000  
 C -4.56335900 0.86818900 0.01067800  
 C -4.04948400 -0.13551800 -0.82654200  
 C -1.95427900 -1.40786500 -1.59700700  
 C 0.33355400 -2.21930800 -2.10027400  
 C -0.15820300 -3.12861700 -2.94807200  
 C -1.63309900 -3.30704300 -3.22818200  
 C -2.46548200 -2.31946500 -2.45090800  
 H -4.11606200 2.37753300 1.50861600  
 H -5.62709000 1.08600600 -0.00233100  
 H -4.70943800 -0.68771000 -1.48600200  
 H 1.37361400 -2.03469300 -1.88009800  
 H 0.55025900 -3.76373600 -3.47324900  
 H -1.83422300 -3.19394500 -4.30460800  
 H -3.54271800 -2.34698300 -2.59726900  
 C 1.06351800 1.87865900 2.09170000  
 C 0.93980600 2.91482500 3.03034000  
 C -0.33038700 3.46567400 3.28086400  
 C -1.44594800 2.96182800 2.58496900  
 C -1.27063900 1.92553400 1.65768900  
 H 2.02730900 1.43554100 1.88077900  
 H 1.82234300 3.27515100 3.54797500  
 H -0.45192200 4.26833900 4.00182300

|        |             |             |             |        |             |             |             |
|--------|-------------|-------------|-------------|--------|-------------|-------------|-------------|
| H      | -2.43273400 | 3.37421900  | 2.76610500  | H      | 4.71685800  | -0.00536900 | 1.74657200  |
| N      | -0.01353000 | 1.39785100  | 1.42048800  | H      | 5.82716100  | 0.16174000  | -0.48000000 |
| N      | -1.86707200 | 0.31765200  | 0.03846700  | H      | 4.44532700  | 0.21774200  | -2.56652700 |
| O      | 0.52434200  | 1.30975100  | -1.36033500 | C      | 0.38500600  | -3.48900700 | -0.27608800 |
| O      | -0.52433400 | -1.30985200 | -1.36025500 | C      | -1.91218900 | -3.91335000 | -0.15586500 |
| H      | -1.95189900 | -4.33399200 | -2.99132500 | H      | 1.46297900  | -3.58540700 | -0.34281000 |
| H      | 1.95193100  | 4.33394600  | -2.99132400 | H      | -2.87560100 | -4.40428400 | -0.11404500 |
|        |             |             |             | C      | -1.78466900 | 2.22571100  | 0.11931400  |
| [Z4]2+ |             |             |             | C      | -2.34560800 | 3.51391000  | 0.22405400  |
| Co     | 0.08064900  | -0.10461800 | -0.12050000 | C      | -1.49413000 | 4.63272800  | 0.24517400  |
| N      | 0.52369100  | -0.19487500 | 1.84888800  | C      | -0.10321400 | 4.43852600  | 0.16153100  |
| N      | -0.43151700 | 2.04617800  | 0.03671000  | C      | 0.38557800  | 3.12405000  | 0.05809400  |
| N      | 1.98466700  | -0.00823700 | -0.25116600 | C      | -2.59222000 | 0.97757500  | 0.09275600  |
| N      | -1.88056400 | -0.18914600 | 0.00115200  | C      | -3.99796100 | 0.95039400  | 0.15801500  |
| N      | -0.21569300 | -2.32869700 | -0.20048500 | C      | -4.66530900 | -0.28771900 | 0.12891900  |
| N      | 0.20339500  | 0.00875100  | -2.11008000 | C      | -3.92428000 | -1.47506400 | 0.03590900  |
| C      | -0.57392900 | 0.03537600  | -3.16250500 | C      | -2.51814300 | -1.39998100 | -0.02736400 |
| C      | 1.64305700  | 0.18024900  | -3.91960300 | H      | -3.41817400 | 3.65599100  | 0.28989900  |
| H      | -1.65393200 | -0.01640900 | -3.09522300 | H      | -1.90842900 | 5.63286100  | 0.32621400  |
| H      | 2.52109400  | 0.25803500  | -4.54731300 | H      | 0.58495000  | 5.27695700  | 0.17619600  |
| C      | 1.87502200  | -0.14441500 | 2.10973500  | H      | 1.45164400  | 2.93026200  | -0.00787400 |
| C      | 2.36813400  | -0.18886500 | 3.42380500  | H      | -4.56844500 | 1.86813200  | 0.23059400  |
| C      | 1.46159500  | -0.28654400 | 4.49474100  | H      | -5.74915500 | -0.32272500 | 0.17845300  |
| C      | 0.08311000  | -0.33754100 | 4.22016100  | H      | -4.42232800 | -2.43790600 | 0.01217700  |
| C      | -0.34555200 | -0.28932200 | 2.88306400  | C      | 1.58855700  | 0.09855600  | -2.56259100 |
| C      | 2.71572700  | -0.04126900 | 0.89835000  | C      | 0.22323200  | 0.14717000  | -4.43895500 |
| C      | 4.11932400  | 0.01971300  | 0.84254300  | H      | -0.04165100 | 1.05007400  | -5.01144300 |
| C      | 4.74449000  | 0.11391500  | -0.41732200 | H      | 0.03605600  | -0.69956500 | -5.11784900 |
| C      | 3.97222500  | 0.14570400  | -1.59320100 | C      | -1.64586500 | -2.57511600 | -0.12453900 |
| C      | 2.57137100  | 0.08188600  | -1.47937200 | C      | -0.59291200 | -4.64061400 | -0.25762800 |
| H      | 3.43485900  | -0.14736300 | 3.61504700  | H      | -0.51492700 | -5.26552500 | -1.16101900 |
| H      | 1.82345800  | -0.32119000 | 5.51755700  | H      | -0.41319100 | -5.32072000 | 0.58984300  |
| H      | -0.64726300 | -0.41238300 | 5.01854100  |        |             |             |             |
| H      | -1.39933900 | -0.32602200 | 2.63460000  | [Z4]3+ |             |             |             |

|    |             |             |             |        |             |             |             |
|----|-------------|-------------|-------------|--------|-------------|-------------|-------------|
| Co | -0.00006900 | -0.00032400 | -0.14565500 | C      | 1.28470600  | -3.18380500 | 3.17152100  |
| N  | -0.40384300 | 1.34926000  | 1.24171600  | C      | -0.08747800 | -3.02519000 | 2.90591600  |
| N  | 0.40414000  | -1.34820300 | 1.24309700  | C      | -0.49210800 | -2.09633600 | 1.93283700  |
| N  | -1.89673600 | -0.17887900 | -0.16432600 | C      | 2.61681200  | -0.61669000 | 0.67721100  |
| N  | 1.89674200  | 0.17798000  | -0.16529600 | C      | 4.01875600  | -0.52602700 | 0.68520000  |
| N  | 0.09932800  | 1.39332300  | -1.51814900 | C      | 4.64245400  | 0.39339000  | -0.18724900 |
| N  | -0.09975400 | -1.39484900 | -1.51715900 | C      | 3.87505100  | 1.20204200  | -1.04892600 |
| C  | 0.71359700  | -2.09690100 | -2.26712300 | C      | 2.47387800  | 1.07289200  | -1.01929800 |
| C  | -1.48654900 | -2.76584400 | -2.75932600 | H      | 3.27739500  | -2.51499400 | 2.64824100  |
| H  | 1.79149300  | -1.98945900 | -2.24254500 | H      | 1.62459800  | -3.89417100 | 3.91888500  |
| H  | -2.34261300 | -3.27115200 | -3.18860900 | H      | -0.83428400 | -3.60502600 | 3.43765700  |
| C  | -1.75539200 | 1.49436200  | 1.49452500  | H      | -1.54134700 | -1.95366900 | 1.70776100  |
| C  | -2.21468400 | 2.40741900  | 2.45449900  | H      | 4.61899200  | -1.14332400 | 1.34415300  |
| C  | -1.28362000 | 3.18589100  | 3.16930200  | H      | 5.72508200  | 0.47746300  | -0.19321000 |
| C  | 0.08835400  | 3.02864400  | 2.90184400  | H      | 4.35408800  | 1.90814600  | -1.71882100 |
| C  | 0.49265200  | 2.09911100  | 1.92925900  | C      | -1.47702300 | -1.79436900 | -1.80609800 |
| C  | -2.61657700 | 0.61652800  | 0.67772600  | C      | -0.05411200 | -3.04967800 | -3.14302200 |
| C  | -4.01854500 | 0.52631300  | 0.68569300  | H      | 0.23707800  | -4.09848100 | -2.96455500 |
| C  | -4.64251500 | -0.39335200 | -0.18629800 | H      | 0.14664700  | -2.88137800 | -4.21422400 |
| C  | -3.87536500 | -1.20272400 | -1.04749000 | C      | 1.47647400  | 1.79287900  | -1.80747700 |
| C  | -2.47416300 | -1.07403300 | -1.01789200 | C      | 0.05314700  | 3.04825800  | -3.14389000 |
| H  | -3.27637600 | 2.51467200  | 2.64943000  | H      | -0.14783700 | 2.87974900  | -4.21501300 |
| H  | -1.62320400 | 3.89642200  | 3.91666500  | H      | -0.23811800 | 4.09706600  | -2.96556400 |
| H  | 0.83521400  | 3.61002100  | 3.43183500  |        |             |             |             |
| H  | 1.54168700  | 1.95736100  | 1.70265500  | [Z5]2+ |             |             |             |
| H  | -4.61864900 | 1.14443300  | 1.34397100  | Co     | 0.07983800  | -0.08007100 | -0.10781400 |
| H  | -5.72518600 | -0.47690600 | -0.19238600 | N      | 0.53358900  | -0.25467600 | 1.85137800  |
| H  | -4.35460000 | -1.90900800 | -1.71703300 | N      | -0.45529000 | 2.03486400  | 0.10713400  |
| C  | -0.71427800 | 2.09544800  | -2.26778500 | N      | 1.97883700  | -0.00574400 | -0.24591000 |
| C  | 1.48568300  | 2.76460500  | -2.76047700 | N      | -1.87894700 | -0.20163700 | -0.02226200 |
| H  | -1.79211800 | 1.98778000  | -2.24281900 | N      | -0.26189000 | -2.32010300 | -0.27907200 |
| H  | 2.34163100  | 3.26990600  | -3.19000800 | N      | 0.25032800  | 0.08842900  | -2.11788300 |
| C  | 1.75583900  | -1.49395100 | 1.49480400  | C      | -0.41364800 | 0.17494000  | -3.28214600 |
| C  | 2.21553100  | -2.40673800 | 2.45485600  | C      | 1.65708100  | 0.29431700  | -3.87438800 |



|   |             |             |             |        |             |             |             |
|---|-------------|-------------|-------------|--------|-------------|-------------|-------------|
| N | 1.60263800  | 0.16654200  | -2.50088500 | C      | -2.50680000 | -1.39957300 | -0.11846500 |
| H | -1.48889500 | 0.14927500  | -3.35529200 | H      | -3.45898800 | 3.61734400  | 0.35451100  |
| H | 2.56737400  | 0.37519600  | -4.44771400 | H      | -1.96354500 | 5.60206300  | 0.48062100  |
| C | 1.88852900  | -0.23647800 | 2.10541300  | H      | 0.53377100  | 5.26649700  | 0.36758100  |
| C | 2.39042500  | -0.34196900 | 3.41166100  | H      | 1.42224500  | 2.93514100  | 0.12922000  |
| C | 1.48910400  | -0.46856900 | 4.48499100  | H      | -4.60206100 | 1.81122500  | 0.17982300  |
| C | 0.10858200  | -0.48400700 | 4.21878900  | H      | -5.74486500 | -0.39400200 | 0.01122300  |
| C | -0.32946900 | -0.37384700 | 2.88760200  | H      | -4.39324600 | -2.48323500 | -0.19165000 |
| C | 2.72334000  | -0.10242300 | 0.89360500  | N      | 0.41755900  | 0.30190500  | -4.37822100 |
| C | 4.12620300  | -0.07735100 | 0.81345500  | N      | -0.75307200 | -4.54960600 | -0.40759500 |
| C | 4.73241500  | 0.04326000  | -0.45359700 |        |             |             |             |
| C | 3.94943800  | 0.13323700  | -1.62167400 | [Z5]3+ |             |             |             |
| C | 2.55867500  | 0.10209800  | -1.46179000 | Co     | 0.00000600  | -0.00014300 | -0.11957200 |
| H | 3.45898900  | -0.32720700 | 3.59664300  | N      | 0.44161600  | -1.33203800 | 1.26140000  |
| H | 1.85714500  | -0.55315500 | 5.50254500  | N      | -0.44142400 | 1.33503900  | 1.25832000  |
| H | -0.61727300 | -0.58005800 | 5.01898800  | N      | 1.88765700  | 0.19953000  | -0.17434500 |
| H | -1.38620900 | -0.38142700 | 2.64847300  | N      | -1.88766200 | -0.19993300 | -0.17363200 |
| H | 4.73915600  | -0.15361800 | 1.70380300  | N      | -0.10711200 | -1.41021400 | -1.49841400 |
| H | 5.81467100  | 0.06233800  | -0.53421500 | N      | 0.10691100  | 1.40661700  | -1.50177700 |
| H | 4.41271700  | 0.21851900  | -2.59820900 | C      | -0.62079000 | 2.19408100  | -2.31861300 |
| C | 0.22345600  | -3.56719900 | -0.38394500 | C      | 1.42511800  | 2.74224500  | -2.75438300 |
| C | -1.90405400 | -3.88042600 | -0.31382900 | N      | 1.44397100  | 1.76205700  | -1.78263000 |
| N | -1.65156500 | -2.52015000 | -0.23290800 | H      | -1.69889400 | 2.18473000  | -2.36468200 |
| H | 1.27779500  | -3.78546600 | -0.44386300 | H      | 2.30221300  | 3.21260700  | -3.17489600 |
| H | -2.88536400 | -4.32727100 | -0.30093000 | C      | 1.80237700  | -1.47850900 | 1.47597400  |
| C | -1.81208700 | 2.20505500  | 0.17009500  | C      | 2.28772200  | -2.39794600 | 2.41561300  |
| C | -2.38430400 | 3.48415100  | 0.30538800  | C      | 1.37610400  | -3.18163900 | 3.15166600  |
| C | -1.54090500 | 4.60754600  | 0.37757400  | C      | -0.00257200 | -3.01929900 | 2.92681500  |
| C | -0.14783900 | 4.42432700  | 0.31477700  | C      | -0.43533000 | -2.08274000 | 1.97193700  |
| C | 0.35331900  | 3.11698700  | 0.17943800  | C      | 2.64023000  | -0.59812700 | 0.63878800  |
| C | -2.60943600 | 0.95549000  | 0.08329900  | C      | 4.04086800  | -0.50250500 | 0.58515900  |
| C | -4.01468500 | 0.90524500  | 0.09904200  | C      | 4.62366500  | 0.41684000  | -0.31549400 |
| C | -4.66081800 | -0.34076900 | 0.00300200  | C      | 3.82491400  | 1.22565900  | -1.15345700 |
| C | -3.90557900 | -1.51888100 | -0.10946700 | C      | 2.43754400  | 1.07634700  | -1.04581100 |

|        |             |             |             |   |             |             |             |
|--------|-------------|-------------|-------------|---|-------------|-------------|-------------|
| H      | 3.35474400  | -2.50899900 | 2.57783800  | C | 2.58307400  | 0.83871900  | -0.71608900 |
| H      | 1.73658600  | -3.89971100 | 3.88197800  | C | 2.60850000  | -0.86687100 | 0.95284700  |
| H      | -0.73450400 | -3.60310400 | 3.47496000  | C | 4.02098000  | -0.87638400 | 0.95479000  |
| H      | -1.49143800 | -1.93813400 | 1.78105500  | C | 4.70518100  | -0.00819900 | 0.09249400  |
| H      | 4.67260800  | -1.11908100 | 1.21461200  | C | 3.98568600  | 0.86511700  | -0.74966900 |
| H      | 5.70502100  | 0.50227600  | -0.37027100 | C | 1.68585400  | 1.70591800  | -1.51326800 |
| H      | 4.27858700  | 1.92453000  | -1.84818800 | C | -0.56473900 | 2.27034500  | -1.92544400 |
| C      | 0.62048500  | -2.19988700 | -2.31321000 | C | -0.19068800 | 3.24180300  | -2.86897000 |
| C      | -1.42548700 | -2.74908300 | -2.74738000 | C | 1.17685900  | 3.43679400  | -3.13415600 |
| N      | -1.44421500 | -1.76632700 | -1.77822200 | C | 2.12634100  | 2.65845100  | -2.44771400 |
| H      | 1.69858300  | -2.19066500 | -2.35943800 | H | 4.56210700  | -1.54144000 | 1.61850700  |
| H      | -2.30264100 | -3.22047300 | -3.16661900 | H | 5.79058500  | -0.00119500 | 0.07914100  |
| C      | -1.80216400 | 1.48203700  | 1.47267400  | H | 4.51529400  | 1.54660200  | -1.40448400 |
| C      | -2.28742000 | 2.40368100  | 2.41019700  | H | -1.60851900 | 2.08976800  | -1.69578100 |
| C      | -1.37573300 | 3.18908000  | 3.14433700  | H | -0.95149600 | 3.82471800  | -3.37662400 |
| C      | 0.00292000  | 3.02620000  | 2.91974100  | H | 1.49860200  | 4.17828600  | -3.85869700 |
| C      | 0.43558800  | 2.08741200  | 1.96701500  | H | 3.18364500  | 2.79784600  | -2.64300300 |
| C      | -2.64012300 | 0.59972500  | 0.63763100  | N | 1.92449000  | -0.02717500 | 0.11641600  |
| C      | -4.04077400 | 0.50413200  | 0.58427400  | N | 0.34789200  | 1.51981900  | -1.26317300 |
| C      | -4.62370700 | -0.41730200 | -0.31415000 | C | -2.58308300 | -0.83868200 | -0.71612500 |
| C      | -3.82507100 | -1.22819600 | -1.15021700 | C | -2.60850000 | 0.86681700  | 0.95290500  |
| C      | -2.43768200 | -1.07876900 | -1.04298200 | C | -4.02098000 | 0.87631900  | 0.95486700  |
| H      | -3.35442700 | 2.51514000  | 2.57223900  | C | -4.70518500 | 0.00818400  | 0.09252300  |
| H      | -1.73614200 | 3.90886200  | 3.87299900  | C | -3.98569400 | -0.86508000 | -0.74969700 |
| H      | 0.73490300  | 3.61128500  | 3.46645100  | C | -1.68586400 | -1.70583300 | -1.51335600 |
| H      | 1.49168000  | 1.94241500  | 1.77635200  | C | 0.56472900  | -2.27023600 | -1.92556800 |
| H      | -4.67242200 | 1.12228200  | 1.21227400  | C | 0.19067700  | -3.24164100 | -2.86914700 |
| H      | -5.70507400 | -0.50275700 | -0.36868100 | C | -1.17687100 | -3.43661800 | -3.13434300 |
| H      | -4.27884200 | -1.92866900 | -1.84326800 | C | -2.12635200 | -2.65831400 | -2.44785500 |
| N      | 0.15830400  | 3.01860900  | -3.09350900 | H | -4.56210400 | 1.54133000  | 1.61863200  |
| N      | -0.15873100 | -3.02609300 | -3.08619400 | H | -5.79058900 | 0.00117500  | 0.07918200  |
|        |             |             |             | H | -4.51530500 | -1.54653100 | -1.40454600 |
| [Z6]2+ |             |             |             | H | 1.60851000  | -2.08967200 | -1.69589600 |
| Co     | -0.00000300 | -0.00000200 | 0.08043800  | H | 0.95148400  | -3.82452800 | -3.37683500 |

|        |             |             |             |   |             |             |             |
|--------|-------------|-------------|-------------|---|-------------|-------------|-------------|
| H      | -1.49861400 | -4.17807000 | -3.85892400 | H | -5.71512100 | -0.51092700 | -0.26332100 |
| H      | -3.18365600 | -2.79769900 | -2.64314900 | H | -4.64415300 | 1.12218600  | 1.29071500  |
| N      | -1.92449500 | 0.02716800  | 0.11642300  | H | 1.52562600  | 1.93306300  | 1.72143100  |
| N      | -0.34790200 | -1.51974600 | -1.26325400 | H | 0.80485200  | 3.62796000  | 3.39929500  |
| C      | 1.79631600  | -1.70312300 | 1.81668400  | H | -1.65795700 | 3.93377300  | 3.85165400  |
| C      | 2.01897000  | -2.68142000 | 2.76217100  | H | -3.30488100 | 2.52944300  | 2.59842700  |
| C      | 0.73211000  | -3.09119700 | 3.27326800  | N | -1.88891800 | -0.21152400 | -0.15259400 |
| H      | 2.97604900  | -3.07733400 | 3.07072700  | N | -0.42265400 | 1.32453100  | 1.25357000  |
| C      | -0.22550900 | -2.35138800 | 2.62540100  | C | 2.63072500  | -0.58836900 | 0.67148900  |
| H      | 0.55261200  | -3.84102200 | 4.02957900  | C | 2.44502100  | 1.10342600  | -1.02570800 |
| H      | -1.30150400 | -2.30475100 | 2.67661400  | C | 3.85070900  | 1.23061600  | -1.08072900 |
| C      | -1.79630800 | 1.70301700  | 1.81678400  | C | 4.63292200  | 0.42530900  | -0.23444900 |
| C      | -2.01894800 | 2.68123700  | 2.76235300  | C | 4.02866300  | -0.49956800 | 0.65153200  |
| C      | -0.73207000 | 3.09111400  | 3.27332300  | C | 1.77995700  | -1.47312100 | 1.48816100  |
| H      | -2.97602300 | 3.07713100  | 3.07095000  | C | -0.47551500 | -2.08102800 | 1.93465100  |
| C      | 0.22552800  | 2.35121300  | 2.62553200  | C | -0.06161300 | -3.03225900 | 2.88041200  |
| H      | -0.55255300 | 3.84098200  | 4.02958800  | C | 1.31298500  | -3.19953000 | 3.12988200  |
| H      | 1.30152300  | 2.30455600  | 2.67674500  | C | 2.24081300  | -2.40895600 | 2.42368500  |
| O      | 0.39864300  | -1.47893700 | 1.71397700  | H | 4.31540900  | 1.93325000  | -1.76421300 |
| O      | -0.39863700 | 1.47881900  | 1.71406200  | H | 5.71519900  | 0.51027000  | -0.26336900 |
|        |             |             |             | H | 4.64396400  | -1.12059700 | 1.29285700  |
| [Z6]3+ |             |             |             | H | -1.52590900 | -1.93060500 | 1.72372200  |
| Co     | 0.00000800  | -0.00004100 | -0.08841800 | H | -0.80549200 | -3.62321900 | 3.40406700  |
| C      | -2.63081000 | 0.58918300  | 0.67036200  | H | 1.65723600  | -3.92852800 | 3.85724800  |
| C      | -2.44482900 | -1.10492800 | -1.02450200 | H | 3.30442900  | -2.52600200 | 2.60233400  |
| C      | -3.85050200 | -1.23229800 | -1.07949200 | N | 1.88896600  | 0.21124300  | -0.15265200 |
| C      | -4.63285100 | -0.42587200 | -0.23440400 | N | 0.42246600  | -1.32278200 | 1.25539800  |
| C      | -4.02873900 | 0.50029000  | 0.65033700  | C | -1.47304500 | -1.82801100 | -1.81689900 |
| C      | -1.78018900 | 1.47510800  | 1.48593100  | C | -1.43017800 | -2.79240100 | -2.79232900 |
| C      | 0.47519500  | 2.08370500  | 1.93197100  | C | -0.04053600 | -3.01675500 | -3.13688500 |
| C      | 0.06109300  | 3.03621500  | 2.87635600  | H | -2.27575900 | -3.30126900 | -3.23581900 |
| C      | -1.31355100 | 3.20376800  | 3.12537100  | C | 0.73242300  | -2.19002600 | -2.37070000 |
| C      | -2.24123100 | 2.41219000  | 2.42011300  | H | 0.32465400  | -3.71651800 | -3.87578800 |
| H      | -4.31508500 | -1.93587700 | -1.76208300 | H | 1.79196000  | -2.00904200 | -2.28554300 |

|        |             |             |             |   |             |             |             |
|--------|-------------|-------------|-------------|---|-------------|-------------|-------------|
| C      | 1.47334300  | 1.82558300  | -1.81908700 | C | -1.70912800 | -1.71184100 | 4.14779700  |
| C      | 1.43063000  | 2.78879700  | -2.79568900 | C | -1.01540900 | -0.49029400 | 4.03398400  |
| C      | 0.04104000  | 3.01275000  | -3.14071100 | H | -2.37593400 | -3.50197200 | 3.12716400  |
| H      | 2.27627200  | 3.29718000  | -3.23961600 | H | -2.14888800 | -1.99542200 | 5.09885500  |
| C      | -0.73205000 | 2.18697200  | -2.37363100 | H | -0.92046200 | 0.16850300  | 4.89107700  |
| H      | -0.32403500 | 3.71169400  | -3.88044400 | C | -0.60440000 | -2.84938100 | -1.71989700 |
| H      | -1.79160600 | 2.00617500  | -2.28835500 | C | -1.20902000 | -4.09149000 | -1.97799800 |
| O      | -0.11998000 | -1.42124100 | -1.52482500 | C | -1.87227200 | -4.75622000 | -0.93163300 |
| O      | 0.12021500  | 1.41920200  | -1.52669700 | C | -1.91028900 | -4.15779300 | 0.34066000  |
|        |             |             |             | C | -1.28639600 | -2.91491500 | 0.53187800  |
| [Z7]2+ |             |             |             | H | -0.08577600 | -2.31083500 | -2.50366700 |
| Co     | 0.16330500  | -0.48939100 | 0.04140800  | H | -1.15804600 | -4.51958400 | -2.97327600 |
| C      | 2.20629400  | -0.33043000 | -2.00689600 | H | -2.34922800 | -5.71652700 | -1.10043400 |
| C      | 0.16982100  | 0.76616800  | -2.56346100 | H | -2.41776300 | -4.65343100 | 1.16109800  |
| C      | 0.68411500  | 1.16623600  | -3.81083700 | N | -0.63809200 | -2.26922400 | -0.49745600 |
| C      | 1.99761100  | 0.79740800  | -4.14856200 | N | -0.58806600 | -0.99825500 | 1.72161700  |
| C      | 2.76784200  | 0.04572300  | -3.24467200 | C | 1.35674100  | 3.00398700  | 2.29471900  |
| C      | 2.92148500  | -1.11566300 | -0.96780500 | C | 1.39597100  | 2.35551300  | 1.02072100  |
| C      | 2.76535600  | -2.08069000 | 1.16648600  | C | 2.04623400  | 2.97430300  | -0.06735500 |
| C      | 4.08485300  | -2.56337700 | 1.09687500  | C | 2.63691200  | 4.22269400  | 0.15479300  |
| C      | 4.83640200  | -2.29940800 | -0.06226300 | C | 2.58918500  | 4.85619400  | 1.43022200  |
| C      | 4.24810100  | -1.56630000 | -1.10822400 | C | 1.94840900  | 4.25792800  | 2.52290400  |
| H      | 0.08537900  | 1.74713600  | -4.50465000 | C | 0.28973400  | 1.03441800  | 2.40450600  |
| H      | 2.41688800  | 1.09249200  | -5.10536900 | H | 2.09061900  | 2.50148900  | -1.04173300 |
| H      | 3.78078700  | -0.23666700 | -3.50363500 | H | 1.91612400  | 4.74611000  | 3.49201200  |
| H      | 2.15245400  | -2.26261600 | 2.04377900  | H | 0.44225900  | 2.30578100  | 4.11839200  |
| H      | 4.50427200  | -3.12542200 | 1.92451400  | N | 0.64906900  | 2.13765600  | 3.14180800  |
| H      | 5.85823700  | -2.65485400 | -0.15139600 | N | 0.72074800  | 1.13039100  | 1.12822400  |
| H      | 4.82100000  | -1.35678100 | -2.00441000 | C | -2.87438200 | 1.09045300  | -0.67608400 |
| N      | 0.92827600  | 0.03028500  | -1.69263300 | C | -3.26106000 | 1.85045700  | -1.82446100 |
| N      | 2.19712000  | -1.37548400 | 0.16274400  | C | -4.52549500 | 2.45394000  | -1.93782300 |
| C      | -0.45809200 | -0.15595500 | 2.78828000  | C | -5.40295500 | 2.27413100  | -0.86006300 |
| C      | -1.25829200 | -2.17688600 | 1.81188400  | C | -5.03275900 | 1.51782600  | 0.29061500  |
| C      | -1.83777300 | -2.56562500 | 3.03550100  | C | -3.77284900 | 0.91975300  | 0.39836400  |

|        |             |             |             |   |             |             |             |
|--------|-------------|-------------|-------------|---|-------------|-------------|-------------|
| C      | -1.16722500 | 1.07175000  | -2.06229900 | C | -2.85547900 | 1.34021300  | -2.86508400 |
| H      | -4.81839400 | 3.03095500  | -2.80957200 | C | -2.50227100 | 0.47383200  | -3.92120400 |
| H      | -6.39224000 | 2.72046500  | -0.89987500 | C | -1.39944200 | -0.39900700 | -3.80360600 |
| H      | -5.75187900 | 1.40763100  | 1.09703800  | H | -3.70647300 | 2.00409600  | -2.96731000 |
| H      | -3.49569300 | 0.34278900  | 1.27542500  | H | -3.08711100 | 0.47803700  | -4.83611500 |
| H      | -2.09795200 | 2.26747600  | -3.58740500 | H | -1.13729200 | -1.06329100 | -4.62063000 |
| N      | -1.56625200 | 0.62351400  | -0.86039100 | C | -1.37437500 | 2.52726500  | 1.69251800  |
| N      | -2.15392100 | 1.81658400  | -2.68341300 | C | -2.36633500 | 3.48811400  | 1.95272000  |
| H      | 3.06210200  | 5.82560800  | 1.55586000  | C | -3.32842400 | 3.76281000  | 0.96501000  |
| H      | 3.14709800  | 4.72730600  | -0.66047000 | C | -3.27025500 | 3.06725200  | -0.25826800 |
|        |             |             |             | C | -2.25790600 | 2.11966400  | -0.46230100 |
| [Z7]3+ |             |             |             | H | -0.62237000 | 2.29600700  | 2.43596800  |
| Co     | 0.00003000  | 0.46703900  | 0.00000400  | H | -2.37734900 | 4.00303300  | 2.90736000  |
| C      | 2.08237200  | 1.31849000  | 1.68898700  | H | -4.10623400 | 4.49962400  | 1.14002500  |
| C      | 0.66266700  | -0.37790900 | 2.60703900  | H | -4.00440100 | 3.26529300  | -1.03193700 |
| C      | 1.39938500  | -0.39904100 | 3.80361800  | N | -1.31768300 | 1.85785100  | 0.51616700  |
| C      | 2.50231400  | 0.47367600  | 3.92120400  | N | -1.02266200 | 0.47355200  | -1.60273000 |
| C      | 2.85563000  | 1.33999000  | 2.86506600  | C | 2.24552500  | -2.54555100 | -1.99912100 |
| C      | 2.25816200  | 2.11943300  | 0.46224400  | C | 2.12025700  | -1.76888100 | -0.80196500 |
| C      | 1.37467600  | 2.52708000  | -1.69259000 | C | 3.03158200  | -1.96131700 | 0.25856500  |
| C      | 2.36674400  | 3.48780800  | -1.95281600 | C | 4.03257100  | -2.92227400 | 0.08502800  |
| C      | 3.32887100  | 3.76241700  | -0.96511600 | C | 4.14269900  | -3.68808200 | -1.11337400 |
| C      | 3.27062300  | 3.06689600  | 0.25818000  | C | 3.25042400  | -3.51213700 | -2.17672700 |
| H      | 1.13713900  | -1.06327800 | 4.62065000  | C | 0.50183600  | -1.15139300 | -2.20311800 |
| H      | 3.08714200  | 0.47784200  | 4.83612300  | H | 2.97367600  | -1.39203200 | 1.17835100  |
| H      | 3.70670300  | 2.00377100  | 2.96728800  | H | 3.33787200  | -4.09588100 | -3.08781200 |
| H      | 0.62264500  | 2.29587100  | -2.43603300 | H | 1.03092600  | -2.49002000 | -3.77663400 |
| H      | 2.37781100  | 4.00270600  | -2.90746700 | N | 1.21077000  | -2.12376500 | -2.84764600 |
| H      | 4.10676300  | 4.49913900  | -1.14015700 | N | 1.02044800  | -0.91065100 | -0.96983900 |
| H      | 4.00479100  | 3.26486900  | 1.03184400  | C | -2.12049400 | -1.76862700 | 0.80200800  |
| N      | 1.02274000  | 0.47350600  | 1.60271600  | C | -2.24582900 | -2.54524200 | 1.99918700  |
| N      | 1.31790200  | 1.85770300  | -0.51621700 | C | -3.25080300 | -3.51174600 | 2.17682100  |
| C      | -0.66271400 | -0.37794300 | -2.60702600 | C | -4.14308100 | -3.68766900 | 1.11347000  |
| C      | -2.08221300 | 1.31865400  | -1.68901600 | C | -4.03288100 | -2.92191500 | -0.08496300 |

|        |             |             |             |   |             |             |             |
|--------|-------------|-------------|-------------|---|-------------|-------------|-------------|
| C      | -3.03181800 | -1.96103900 | -0.25852600 | C | 1.84927900  | 1.34084600  | 2.00308000  |
| C      | -0.50200500 | -1.15122500 | 2.20313400  | C | 2.46912700  | 1.33361100  | 3.27041400  |
| H      | -3.33828500 | -4.09545300 | 3.08792700  | C | 1.99590300  | 0.45648000  | 4.26121700  |
| H      | -4.93862600 | -4.42130300 | 1.19955100  | C | 0.91518900  | -0.40366800 | 3.98336300  |
| H      | -4.75166600 | -3.09529900 | -0.88031200 | H | 3.30400900  | 1.99052000  | 3.48331800  |
| H      | -2.97385600 | -1.39179000 | -1.17833100 | H | 2.46525900  | 0.43870200  | 5.23970800  |
| H      | -1.03117200 | -2.48977300 | 3.77666900  | H | 0.54934700  | -1.08626100 | 4.74344100  |
| N      | -1.02063000 | -0.91045600 | 0.96986700  | C | 1.76563300  | 2.71220000  | -1.38779800 |
| N      | -1.21103500 | -2.12350700 | 2.84769300  | C | 2.79482400  | 3.67028300  | -1.42610900 |
| H      | 4.93819300  | -4.42176900 | -1.19944600 | C | 3.56394900  | 3.88360900  | -0.26832800 |
| H      | 4.75135200  | -3.09567400 | 0.88037300  | C | 3.28146700  | 3.13432000  | 0.88866900  |
|        |             |             |             | C | 2.23808100  | 2.19282600  | 0.85554000  |
| [Z8]2+ |             |             |             | H | 1.15191100  | 2.52102300  | -2.26149100 |
| Co     | -0.00148700 | 0.50796700  | 0.00014900  | H | 2.98319300  | 4.22799600  | -2.33721900 |
| C      | -1.85826300 | 1.32309300  | -2.00525800 | H | 4.36599600  | 4.61497800  | -0.26431000 |
| C      | -0.33297800 | -0.36453100 | -2.70386800 | H | 3.86738400  | 3.28846000  | 1.78803700  |
| C      | -0.91288800 | -0.42058600 | -3.98084800 | N | 1.49100300  | 1.98978200  | -0.27767000 |
| C      | -1.99946400 | 0.43138500  | -4.26089900 | N | 0.80244200  | 0.50594400  | 1.75024700  |
| C      | -2.47832200 | 1.30806300  | -3.27244000 | C | -2.45756200 | -2.61706200 | 1.97471100  |
| C      | -2.25313600 | 2.17589100  | -0.86032000 | C | -2.25427100 | -1.89086000 | 0.76393300  |
| C      | -1.78524500 | 2.70525400  | 1.38157500  | C | -3.11487000 | -2.21218000 | -0.30548000 |
| C      | -2.82096700 | 3.65641300  | 1.41662300  | C | -4.15913300 | -3.79730000 | 1.07677200  |
| C      | -3.59096100 | 3.86103700  | 0.25785100  | C | -0.77825200 | -1.16517700 | 2.21556100  |
| C      | -3.30286800 | 3.11022000  | -0.89676100 | H | -3.06516400 | -1.72968700 | -1.27730600 |
| H      | -0.54257200 | -1.10280000 | -4.73909700 | H | -1.40096800 | -2.46309000 | 3.82983500  |
| H      | -2.46893600 | 0.40764400  | -5.23920700 | N | -1.50758100 | -2.13505200 | 2.87598100  |
| H      | -3.31768500 | 1.95870100  | -3.48695400 | N | -1.19845300 | -0.99285200 | 0.94651900  |
| H      | -1.17056300 | 2.52091100  | 2.25608400  | C | 2.26813500  | -1.87876500 | -0.76012700 |
| H      | -3.01356000 | 4.21556200  | 2.32597100  | C | 2.47525100  | -2.60629200 | -1.96946200 |
| H      | -4.39795500 | 4.58692700  | 0.25127300  | C | 4.18531800  | -3.77323700 | -1.07032300 |
| H      | -3.88941200 | 3.25776900  | -1.79682000 | C | 3.13174600  | -2.19196400 | 0.30926600  |
| N      | -0.80573300 | 0.49599000  | -1.75022300 | C | 0.78618800  | -1.16601800 | -2.21199800 |
| N      | -1.50523000 | 1.98137900  | 0.27375300  | H | 4.96076800  | -4.52458000 | -1.15986000 |
| C      | 0.33524000  | -0.35509500 | 2.70610700  | H | 3.07966500  | -1.70755800 | 1.28002500  |

|        |             |             |             |   |             |             |             |
|--------|-------------|-------------|-------------|---|-------------|-------------|-------------|
| H      | 1.41610100  | -2.46342200 | -3.82397800 | C | -1.39076200 | -0.45765200 | -3.79871000 |
| N      | 1.52134600  | -2.13256800 | -2.87095100 | H | -3.72187900 | 1.93197400  | -2.98977400 |
| H      | -4.92962000 | -4.55360900 | 1.16733500  | H | -3.09726800 | 0.38276800  | -4.83582400 |
| N      | 3.41081800  | -3.54861400 | -2.16176400 | H | -1.12762900 | -1.13464500 | -4.60523700 |
| N      | 4.08052100  | -3.13732200 | 0.14001700  | C | -1.38383200 | 2.54901800  | 1.66033000  |
| N      | 1.20626100  | -0.98814300 | -0.94373000 | C | -2.38051000 | 3.51008200  | 1.90446900  |
| N      | -3.38703700 | -3.56512200 | 2.16833000  | C | -3.34257000 | 3.76582400  | 0.91169500  |
| N      | -4.05749300 | -3.16343200 | -0.13490600 | C | -3.27975800 | 3.05248700  | -0.30207200 |
|        |             |             |             | C | -2.26362500 | 2.10617900  | -0.49108800 |
| [Z8]3+ |             |             |             | H | -0.63159000 | 2.33308100  | 2.40847000  |
| Co     | 0.00013000  | 0.47360600  | -0.00008400 | H | -2.39495100 | 4.03943600  | 2.85126800  |
| C      | 2.08205600  | 1.28843800  | 1.70671200  | H | -4.12398500 | 4.50170500  | 1.07477300  |
| C      | 0.65119800  | -0.40633600 | 2.60783100  | H | -4.01392000 | 3.23757800  | -1.07913300 |
| C      | 1.39012100  | -0.45730200 | 3.79896000  | N | -1.32361100 | 1.86181300  | 0.49427000  |
| C      | 2.50555500  | 0.40271600  | 3.92547000  | N | -1.01271300 | 0.45707200  | -1.61247700 |
| C      | 2.86141200  | 1.28073200  | 2.88195100  | C | 2.27616700  | -2.53094700 | -1.96860100 |
| C      | 2.26452500  | 2.10529600  | 0.49080100  | C | 2.13499800  | -1.74705500 | -0.78511500 |
| C      | 1.38505100  | 2.54803700  | -1.66078800 | C | 3.09120400  | -1.98675500 | 0.22829600  |
| C      | 2.38211700  | 3.50867300  | -1.90505100 | C | 4.08553400  | -3.61016100 | -1.15416300 |
| C      | 3.34420900  | 3.76422700  | -0.91226700 | C | 0.52422000  | -1.16831100 | -2.19453300 |
| C      | 3.28104300  | 3.05115900  | 0.30164800  | H | 3.10977700  | -1.46233000 | 1.17822200  |
| H      | 1.12654800  | -1.13394500 | 4.60563300  | H | 1.09641100  | -2.53304700 | -3.75723600 |
| H      | 3.09676200  | 0.38277700  | 4.83615700  | N | 1.24624400  | -2.13860200 | -2.83122500 |
| H      | 3.72223900  | 1.93127300  | 2.98977500  | N | 1.02999300  | -0.90540200 | -0.95942900 |
| H      | 0.63277300  | 2.33218800  | -2.40891900 | C | -2.13582400 | -1.74609700 | 0.78540700  |
| H      | 2.39682400  | 4.03782800  | -2.85195800 | C | -2.27693500 | -2.53008000 | 1.96883500  |
| H      | 4.12592500  | 4.49976700  | -1.07543700 | C | -4.08657300 | -3.60897600 | 1.15458000  |
| H      | 4.01524900  | 3.23612200  | 1.07869800  | C | -3.09223000 | -1.98558100 | -0.22788400 |
| N      | 1.01290700  | 0.45683800  | 1.61232800  | C | -0.52480300 | -1.16767400 | 2.19469800  |
| N      | 1.32449700  | 1.86109900  | -0.49459900 | H | -4.87544800 | -4.34331600 | 1.26766500  |
| C      | -0.65156000 | -0.40662400 | -2.60776800 | H | -3.11081600 | -1.46116800 | -1.17781900 |
| C      | -2.08162700 | 1.28896500  | -1.70684000 | H | -1.09713600 | -2.53226300 | 3.75746200  |
| C      | -2.86123900 | 1.28119100  | -2.88191800 | N | -1.24697500 | -2.13779600 | 2.83146200  |
| C      | -2.50589200 | 0.40275300  | -3.92524700 | H | 4.87430900  | -4.34460300 | -1.26721900 |

|        |             |             |             |        |             |             |             |
|--------|-------------|-------------|-------------|--------|-------------|-------------|-------------|
| N      | -3.22090200 | -3.45334000 | 2.18661400  | C      | -2.55612400 | -1.18911100 | 0.00566800  |
| N      | -4.04900100 | -2.91111300 | -0.02773200 | C      | -3.96361100 | -1.21468100 | 0.00569300  |
| N      | -1.03060900 | -0.90469900 | 0.95962900  | C      | -4.67029500 | 0.00001400  | 0.00000000  |
| N      | 3.22002400  | -3.45433500 | -2.18631600 | C      | -3.96360300 | 1.21470600  | -0.00569400 |
| N      | 4.04789900  | -2.91237700 | 0.02817200  | C      | -1.70394800 | 2.40668100  | -0.01172700 |
|        |             |             |             | C      | 0.47791500  | 3.24290700  | -0.01586900 |
| [Z9]2+ |             |             |             | C      | -1.25069100 | 4.77167500  | -0.02383600 |
| Co     | 0.08169800  | 0.00000000  | 0.00000100  | C      | -2.19512500 | 3.72434900  | -0.01858800 |
| C      | 2.64386700  | 0.00641600  | 1.19123300  | H      | -4.50279800 | -2.15453600 | 0.01008300  |
| C      | 2.64387100  | -0.00642900 | -1.19122300 | H      | -5.75562600 | 0.00001800  | 0.00000100  |
| C      | 4.04962400  | -0.00658200 | -1.22119900 | H      | -4.50278400 | 2.15456300  | -0.01008300 |
| C      | 4.75200200  | -0.00001200 | 0.00000900  | H      | 1.54582100  | 3.05375700  | -0.01493600 |
| C      | 4.04962000  | 0.00656100  | 1.22121400  | H      | -1.55812500 | 5.81270300  | -0.02919000 |
| C      | 1.72624300  | 0.01246500  | 2.34973900  | H      | -3.25372700 | 3.95348100  | -0.01999600 |
| C      | -0.52523400 | 0.01579600  | 3.00216900  | C      | 0.47789400  | -3.24291100 | 0.01586400  |
| C      | 1.07911300  | 0.02474500  | 4.66604500  | C      | -1.25072100 | -4.77166700 | 0.02381900  |
| C      | 2.10620600  | 0.01970400  | 3.69925900  | C      | -2.19514900 | -3.72433600 | 0.01857500  |
| H      | 4.58968800  | -0.01173700 | -2.16145600 | C      | -1.70396300 | -2.40667100 | 0.01172100  |
| H      | 5.83732900  | -0.00001400 | 0.00001100  | H      | 1.54580200  | -3.05376800 | 0.01493600  |
| H      | 4.58968100  | 0.01171400  | 2.16147300  | H      | -1.55816200 | -5.81269400 | 0.02916700  |
| H      | -1.57307600 | 0.01430500  | 2.72899600  | H      | -3.25375200 | -3.95346100 | 0.01997800  |
| H      | 1.29871500  | 0.03031700  | 5.72899300  | N      | -0.35336300 | -2.17419300 | 0.01036200  |
| H      | 3.14551200  | 0.02138500  | 4.00606800  | N      | -1.88110000 | 0.00000600  | -0.00000200 |
| C      | -0.52522400 | -0.01579600 | -3.00217000 | N      | -0.35334900 | 2.17419400  | -0.01036400 |
| C      | 1.07912800  | -0.02475300 | -4.66604000 | N      | -0.23303700 | -0.02286000 | -4.31840200 |
| C      | 2.10621900  | -0.01971600 | -3.69925100 | N      | 0.08645600  | 4.53536300  | -0.02248600 |
| C      | 1.72625100  | -0.01247400 | -2.34973200 | N      | 0.08642700  | -4.53536400 | 0.02247400  |
| H      | -1.57306700 | -0.01430100 | -2.72900000 | N      | -0.23305100 | 0.02285700  | 4.31840300  |
| H      | 1.29873400  | -0.03032700 | -5.72898700 |        |             |             |             |
| H      | 3.14552500  | -0.02140200 | -4.00605600 | [Z9]3+ |             |             |             |
| N      | 0.39068800  | -0.01036100 | -2.00263400 | Co     | 0.00016900  | 0.00000000  | 0.00000000  |
| N      | 1.98244700  | -0.00000500 | 0.00000400  | C      | 2.54764000  | -0.00901100 | 1.19706800  |
| N      | 0.39068100  | 0.01035800  | 2.00263600  | C      | 2.54764400  | 0.00900700  | -1.19705900 |
| C      | -2.55611700 | 1.18912700  | -0.00567200 | C      | 3.95361800  | 0.00903000  | -1.22615700 |



|   |             |             |             |         |             |             |             |
|---|-------------|-------------|-------------|---------|-------------|-------------|-------------|
| C | 4.65334100  | -0.00000300 | 0.00000800  | H       | 1.71328800  | 2.65209500  | 0.02216400  |
| C | 3.95361400  | -0.00903500 | 1.22617100  | H       | -1.09685200 | 5.70932100  | 0.04190100  |
| C | 1.60918800  | -0.01796900 | 2.33770100  | H       | -2.98815700 | 4.02525500  | 0.02899000  |
| C | -0.66972500 | -0.02331100 | 2.94009500  | C       | 0.66964300  | -2.94086200 | -0.02352100 |
| C | 0.90378900  | -0.03464700 | 4.64015400  | C       | -0.90434100 | -4.64047800 | -0.03468200 |
| C | 1.95544900  | -0.02754100 | 3.69433100  | C       | -1.95573800 | -3.69433600 | -0.02729600 |
| H | 4.49838100  | 0.01592800  | -2.16423800 | C       | -1.60910800 | -2.33777200 | -0.01772800 |
| H | 5.73932400  | -0.00000300 | 0.00001000  | H       | 1.71328300  | -2.65209900 | -0.02216100 |
| H | 4.49837400  | -0.01593400 | 2.16425400  | H       | -1.09686300 | -5.70931800 | -0.04190900 |
| H | -1.71327600 | -0.02183300 | 2.65106500  | H       | -2.98816500 | -4.02524900 | -0.02900000 |
| H | 1.09602300  | -0.04179800 | 5.70904500  | N       | -0.27384800 | -1.96327000 | -0.01583400 |
| H | 2.98781600  | -0.02936800 | 4.02546000  | N       | -1.89734000 | 0.00000200  | -0.00000300 |
| C | -0.66971500 | 0.02331000  | -2.94009700 | N       | -0.27384400 | 1.96327000  | 0.01583200  |
| C | 0.90380500  | 0.03464300  | -4.64015100 | N       | -0.39795500 | 0.03243000  | -4.25683300 |
| C | 1.95546100  | 0.02753700  | -3.69432500 | N       | 0.39749600  | 4.25751700  | 0.03265700  |
| C | 1.60919600  | 0.01796600  | -2.33769600 | N       | 0.39748800  | -4.25751800 | -0.03266100 |
| H | -1.71326700 | 0.02183300  | -2.65107100 | N       | -0.39797000 | -0.03243200 | 4.25683200  |
| H | 1.09604300  | 0.04179300  | -5.70904100 |         |             |             |             |
| H | 2.98783000  | 0.02936300  | -4.02545000 | [Z10]2+ |             |             |             |
| N | 0.27411300  | 0.01581200  | -1.96276300 | Co      | -0.08623200 | 0.01021900  | 0.00898000  |
| N | 1.89760700  | -0.00000200 | 0.00000300  | C       | -2.66496600 | 0.00800600  | 1.18948400  |
| N | 0.27410700  | -0.01581300 | 1.96276400  | C       | -2.64592300 | 0.03510100  | -1.17390500 |
| C | -2.54738000 | 1.19705900  | 0.00883200  | C       | -4.69331200 | 0.02799100  | -0.11267300 |
| C | -2.54738200 | -1.19705400 | -0.00883800 | C       | -4.06967700 | 0.01132900  | 1.15751700  |
| C | -3.95335900 | -1.22616400 | -0.00886200 | C       | -1.76365600 | -0.01130900 | 2.36006100  |
| C | -4.65309600 | 0.00000500  | -0.00000500 | C       | 0.47981300  | -0.03275700 | 3.03100300  |
| C | -3.95335700 | 1.22617200  | 0.00885400  | C       | -1.14212500 | -0.04783600 | 4.68133300  |
| C | -1.60910300 | 2.33777600  | 0.01772300  | C       | -2.16072400 | -0.02974300 | 3.70269000  |
| C | 0.66964900  | 2.94086100  | 0.02352100  | H       | -5.77440900 | 0.03181500  | -0.20735200 |
| C | -0.90433200 | 4.64048000  | 0.03467500  | H       | -4.67058200 | 0.00095900  | 2.05913500  |
| C | -1.95573000 | 3.69434000  | 0.02728800  | H       | 1.53148600  | -0.03736800 | 2.77247900  |
| H | -4.49812900 | -2.16422700 | -0.01560600 | H       | -1.37168900 | -0.06161100 | 5.74212200  |
| H | -5.73907500 | 0.00000600  | -0.00000500 | H       | -3.20416300 | -0.03029300 | 3.99646700  |
| H | -4.49812500 | 2.16423600  | 0.01559700  | C       | 0.48622400  | 0.03668400  | -3.02764900 |

|   |             |             |             |         |             |             |             |
|---|-------------|-------------|-------------|---------|-------------|-------------|-------------|
| C | -1.15698400 | 0.05553300  | -4.66322800 | N       | 0.03074000  | 4.57066500  | 0.04627300  |
| C | -2.16686600 | 0.05234500  | -3.67485400 | N       | 3.87911000  | -1.30383000 | -0.01803000 |
| C | -1.74553000 | 0.04206100  | -2.34200900 | N       | 0.17154500  | -0.04940900 | 4.34464200  |
| H | 1.54122000  | 0.02775400  | -2.78220600 | N       | -3.98723300 | 0.03929000  | -1.27480900 |
| H | -1.39429500 | 0.06388300  | -5.72222100 |         |             |             |             |
| H | -3.22208100 | 0.05726400  | -3.92311700 | [Z10]3+ |             |             |             |
| N | -0.40758600 | 0.03446000  | -2.00840300 | Co      | -0.00003100 | 0.00043500  | 0.01215700  |
| N | -1.97845000 | 0.02144000  | 0.01091700  | C       | -2.56949800 | -0.79405600 | 0.89179900  |
| N | -0.42380200 | -0.01219400 | 2.02112300  | C       | -2.54484900 | 0.78314000  | -0.88275900 |
| C | 2.53503800  | -1.19463000 | -0.01134900 | C       | -4.59418600 | 0.07153700  | -0.09705000 |
| C | 2.58067000  | 1.16429000  | 0.01195800  | C       | -3.97396600 | -0.77564900 | 0.85994600  |
| C | 3.98605000  | 1.11473400  | 0.00479300  | C       | -1.64661200 | -1.55935400 | 1.75514700  |
| C | 4.60023600  | -0.15551100 | -0.00952700 | C       | 0.62501900  | -1.96937100 | 2.22132000  |
| C | 1.69414600  | -2.41355800 | -0.02435900 | C       | -0.96519200 | -3.09723500 | 3.47720400  |
| C | -0.46415300 | -3.28118900 | -0.03201400 | C       | -2.00928100 | -2.46066200 | 2.76074500  |
| C | 1.30279500  | -4.77819200 | -0.05745400 | H       | -5.67584500 | 0.13326400  | -0.17458200 |
| C | 2.22715700  | -3.71010300 | -0.04517800 | H       | -4.58209800 | -1.37528300 | 1.52804800  |
| H | 4.59413500  | 2.01081700  | 0.00965600  | H       | 1.67287400  | -1.78692700 | 2.01680200  |
| H | 5.68034200  | -0.26195100 | -0.01484200 | H       | -1.16756800 | -3.80892000 | 4.27247200  |
| H | -1.53702300 | -3.12186600 | -0.02993400 | H       | -3.04589300 | -2.67605100 | 2.99625600  |
| H | 1.62771200  | -5.81362700 | -0.07296000 | C       | 0.63795800  | 1.97071500  | -2.21317000 |
| H | 3.29860000  | -3.87106500 | -0.05153100 | C       | -0.97365100 | 3.07684900  | -3.47158500 |
| C | -0.39610000 | 3.28805300  | 0.04082600  | C       | -2.01009600 | 2.43394400  | -2.74894800 |
| C | 1.37158600  | 4.77661900  | 0.04041300  | C       | -1.62276400 | 1.54771200  | -1.74222000 |
| C | 2.29058000  | 3.70442000  | 0.02915400  | H       | 1.68906000  | 1.79707300  | -2.01707600 |
| C | 1.76295400  | 2.40297100  | 0.02526700  | H       | -1.18241800 | 3.78179500  | -4.27097800 |
| H | -1.46897900 | 3.13001800  | 0.04314300  | H       | -3.05983300 | 2.61288700  | -2.95814900 |
| H | 1.70382200  | 5.81001100  | 0.04433400  | N       | -0.28513000 | 1.31016500  | -1.46703200 |
| H | 3.35573200  | 3.90327700  | 0.02356400  | N       | -1.89035300 | -0.00424600 | 0.01003600  |
| N | 0.40632000  | 2.19764300  | 0.03155700  | N       | -0.30596700 | -1.31128100 | 1.48412800  |
| N | 1.86697700  | -0.00435700 | 0.00482900  | C       | 2.54602100  | -0.88191200 | -0.78067700 |
| N | 0.34188400  | -2.19264400 | -0.01715400 | C       | 2.56817000  | 0.89393800  | 0.79511600  |
| N | 0.16090500  | 0.04784600  | -4.33724300 | C       | 3.97267700  | 0.87216800  | 0.76759200  |
| N | -0.03825900 | -4.56402200 | -0.05098800 | C       | 4.59424700  | -0.08204200 | -0.08176000 |

|         |             |             |             |   |             |             |             |
|---------|-------------|-------------|-------------|---|-------------|-------------|-------------|
| C       | 1.62514700  | -1.74279000 | -1.54510600 | C | 0.09811200  | 0.08037500  | -4.37472200 |
| C       | -0.63487000 | -2.21786600 | -1.96731300 | C | -1.27141100 | 0.06587900  | -4.69608500 |
| C       | 0.97863400  | -3.46404200 | -3.08447600 | C | -2.21635100 | 0.03863800  | -3.65233200 |
| C       | 2.01399300  | -2.74120500 | -2.44004700 | H | -4.63702000 | -0.11847100 | 2.09546100  |
| H       | 4.57987300  | 1.54662500  | 1.36101900  | H | -5.75727200 | -0.08352300 | -0.15800600 |
| H       | 5.67601600  | -0.15229700 | -0.14996100 | H | 1.53706200  | 0.07774900  | -2.74793400 |
| H       | -1.68625700 | -2.02249000 | -1.79455100 | H | 0.85576300  | 0.09911600  | -5.15090700 |
| H       | 1.18856000  | -4.25805400 | -3.79513700 | H | -1.59636100 | 0.07411600  | -5.73166500 |
| H       | 3.06404000  | -2.94382300 | -2.62465000 | H | -3.28491000 | 0.02449200  | -3.83901600 |
| C       | -0.62810000 | 2.21693000  | 1.97316700  | C | 0.53134200  | -0.06905700 | 3.01992100  |
| C       | 0.96052500  | 3.48610200  | 3.08830500  | C | -1.18008600 | -0.14266700 | 4.73536600  |
| C       | 2.00550500  | 2.77029600  | 2.45247800  | C | -2.15022000 | -0.12471200 | 3.71542900  |
| C       | 1.64410000  | 1.75601900  | 1.56039500  | C | -1.73144100 | -0.07887900 | 2.37746900  |
| H       | -1.67569300 | 2.01106500  | 1.79070900  | H | 1.57130900  | -0.04918400 | 2.71684800  |
| H       | 1.16184400  | 4.28706800  | 3.79387300  | H | -1.48052300 | -0.17858800 | 5.77772200  |
| H       | 3.04181300  | 3.01305000  | 2.66115200  | H | -3.20595100 | -0.14742200 | 3.96443100  |
| N       | 0.30379200  | 1.47712100  | 1.31926800  | N | -0.39565100 | -0.04968600 | 2.03480100  |
| N       | 1.89026000  | 0.00519100  | 0.01208400  | N | -1.96519200 | -0.02251500 | 0.02707000  |
| N       | 0.28709100  | -1.47457200 | -1.30195300 | N | -0.41331800 | 0.04336200  | -2.01376700 |
| N       | 0.33333600  | 2.83851300  | -3.19622900 | C | 2.53799900  | 1.23364000  | 0.01306400  |
| N       | -0.32875700 | -3.19489500 | -2.84133900 | C | 2.55631900  | -1.13208000 | -0.03508600 |
| N       | -0.34215200 | 3.20352300  | 2.84341700  | C | 4.59087900  | -0.03310500 | -0.02603900 |
| N       | 3.88451000  | -0.95304600 | -0.85129900 | C | 3.94595200  | 1.21908100  | 0.00251100  |
| N       | 0.33785900  | -2.84636300 | 3.20161900  | C | 1.68816600  | 2.44775100  | 0.03978800  |
| N       | -3.88323400 | 0.84564200  | -0.96299900 | C | -0.51660500 | 3.24833500  | 0.06783000  |
|         |             |             |             | C | 1.30640400  | 4.84210300  | 0.06794300  |
| [Z11]2+ |             |             |             | C | 2.20275400  | 3.75730500  | 0.04887600  |
| Co      | -0.07910800 | 0.00722800  | 0.01067100  | H | 5.67366900  | -0.10912700 | -0.03427600 |
| C       | -2.63886500 | -0.00853500 | -1.15508300 | H | 4.53138200  | 2.12947800  | 0.01562500  |
| C       | -2.63712600 | -0.06246100 | 1.21276300  | H | -1.57640900 | 3.01409100  | 0.07295000  |
| C       | -4.04349400 | -0.08605600 | 1.19001700  | H | 1.68014600  | 5.86117600  | 0.07432400  |
| C       | -4.67537500 | -0.06720300 | -0.07324800 | H | 3.27162300  | 3.94024500  | 0.03988000  |
| C       | -1.75263700 | 0.02747500  | -2.33076700 | C | -0.41291300 | -3.26601600 | -0.07637200 |
| C       | 0.48868300  | 0.06867700  | -3.02211000 | C | 0.09580600  | -4.57951800 | -0.11904400 |

|         |             |             |             |   |             |             |             |
|---------|-------------|-------------|-------------|---|-------------|-------------|-------------|
| C       | 1.48982800  | -4.77118200 | -0.13110700 | C | -0.68882100 | -2.06183700 | -2.09788700 |
| C       | 2.33431300  | -3.64524400 | -0.10191000 | C | 0.97449300  | -3.31999700 | -3.33901400 |
| C       | 1.74741400  | -2.36947000 | -0.06095500 | C | 1.97706200  | -2.62479100 | -2.63139900 |
| H       | -1.48351300 | -3.08667100 | -0.06796600 | C | 1.60454600  | -1.66905300 | -1.67801300 |
| H       | -0.58680600 | -5.42255100 | -0.14290900 | H | -1.72163800 | -1.82826000 | -1.87209900 |
| H       | 1.90972700  | -5.77161200 | -0.16370300 | H | 1.24346300  | -4.06535400 | -4.08117400 |
| H       | 3.41490000  | -3.73388600 | -0.11128200 | H | 3.02463700  | -2.83181800 | -2.82510000 |
| N       | 0.39226600  | -2.18019900 | -0.04696000 | N | 0.27100500  | -1.39163800 | -1.41741500 |
| N       | 1.86126100  | 0.04354600  | -0.00455900 | N | 1.88175500  | -0.03090100 | -0.01642900 |
| N       | 0.34029400  | 2.20330900  | 0.05031200  | N | 0.29975000  | 1.37780900  | 1.40053100  |
| N       | 3.90514000  | -1.20297900 | -0.04562500 | C | -2.54106000 | 0.88863800  | -0.84174400 |
| C       | -0.07622200 | 4.58595100  | 0.07690900  | C | -2.54418000 | -0.80968700 | 0.82403200  |
| H       | -0.79819700 | 5.39558900  | 0.08957600  | C | -4.57871800 | -0.01698400 | 0.07867600  |
| C       | 0.18005600  | -0.11528600 | 4.38177500  | C | -3.94698400 | 0.88466500  | -0.81478200 |
| N       | -3.98307400 | -0.02943400 | -1.24328400 | C | -1.60770000 | 1.69821900  | -1.64525400 |
| H       | 0.95754000  | -0.13044400 | 5.13800100  | C | 0.68489300  | 2.09972900  | -2.06120400 |
|         |             |             |             | C | -0.98077800 | 3.37926500  | -3.27704300 |
| [Z11]3+ |             |             |             | C | -1.98200400 | 2.67086900  | -2.58064700 |
| Co      | -0.00000900 | 0.00004000  | -0.01249900 | H | -5.66128100 | -0.06939800 | 0.14706500  |
| C       | 2.54583100  | 0.79441900  | 0.83387700  | H | -4.54453300 | 1.53583300  | -1.44195100 |
| C       | 2.53947200  | -0.87425800 | -0.86157800 | H | 1.71815100  | 1.86255000  | -1.84121400 |
| C       | 3.94543000  | -0.87131100 | -0.83666500 | H | -1.25119400 | 4.13777900  | -4.00521400 |
| C       | 4.57890400  | 0.01411100  | 0.07164100  | H | -3.02993900 | 2.88105500  | -2.76891400 |
| C       | 1.63917100  | 1.60995700  | 1.65581600  | C | 0.63414800  | -2.10272000 | 2.06742300  |
| C       | -0.63022200 | 2.06680300  | 2.10407700  | C | 0.27192500  | -3.06395600 | 3.03107100  |
| C       | -0.26631700 | 3.01093800  | 3.08381300  | C | -1.08892500 | -3.30896100 | 3.28892200  |
| C       | 1.09501200  | 3.25067400  | 3.34427000  | C | -2.06177000 | -2.58016700 | 2.57267400  |
| C       | 2.06660200  | 2.53405100  | 2.61423600  | C | -1.63601500 | -1.63920700 | 1.63007400  |
| H       | 4.54171700  | -1.51153200 | -1.47619600 | H | 1.67734100  | -1.90089400 | 1.85860200  |
| H       | 5.66158500  | 0.06465900  | 0.13953500  | H | 1.04905800  | -3.60247400 | 3.56339500  |
| H       | -1.67374000 | 1.86905900  | 1.89305800  | H | -1.38796900 | -4.04570300 | 4.02812400  |
| H       | -1.04245000 | 3.54060800  | 3.62637600  | H | -3.12571200 | -2.72648300 | 2.73214200  |
| H       | 1.39530200  | 3.97419900  | 4.09592000  | N | -0.29694100 | -1.40214000 | 1.37701200  |
| H       | 3.13081700  | 2.67686700  | 2.77504000  | N | -1.88175400 | 0.03075100  | -0.01260400 |

|         |             |             |             |   |             |             |             |
|---------|-------------|-------------|-------------|---|-------------|-------------|-------------|
| N       | -0.27355500 | 1.41690400  | -1.39156100 | C | 2.53958900  | -1.18688600 | -0.00065300 |
| N       | -3.88566700 | -0.85957200 | 0.89427600  | C | 3.95370200  | 1.16291000  | 0.00050500  |
| C       | 0.36829500  | 3.08873500  | -3.01155100 | C | 1.70697100  | 2.41147000  | 0.00147300  |
| H       | 1.16776700  | 3.61322900  | -3.52430700 | C | -0.48863800 | 3.24108100  | 0.00189600  |
| C       | -0.37407900 | -3.03357400 | -3.06644300 | C | 1.35392800  | 4.81066700  | 0.00323100  |
| N       | 3.88742100  | 0.84248200  | 0.90300000  | C | 2.23744600  | 3.71550200  | 0.00250400  |
| H       | -1.17449600 | -3.54831000 | -3.58754400 | H | 4.54583000  | 2.07060500  | 0.00080200  |
|         |             |             |             | H | -1.55139200 | 3.01999900  | 0.00164300  |
| [Z12]2+ |             |             |             | H | 1.74069000  | 5.82492400  | 0.00403400  |
| Co      | -0.08057400 | 0.00000100  | 0.00000000  | H | 3.30823800  | 3.88675200  | 0.00277500  |
| C       | -2.62925100 | 0.00081800  | -1.18864500 | C | -0.48863000 | -3.24108000 | -0.00189800 |
| C       | -2.62924700 | -0.00081500 | 1.18865300  | C | -0.03218600 | -4.57259900 | -0.00291500 |
| C       | -4.04169600 | -0.00080400 | 1.16853400  | C | 1.35393700  | -4.81066300 | -0.00323000 |
| C       | -1.72933800 | 0.00160500  | -2.35542400 | C | 2.23745200  | -3.71549300 | -0.00250700 |
| C       | 0.53322400  | 0.00206400  | -3.00412900 | C | 1.70697500  | -2.41146400 | -0.00147700 |
| C       | 0.17894700  | 0.00296400  | -4.36515200 | H | -1.55138600 | -3.02000700 | -0.00163800 |
| C       | -1.18264000 | 0.00317500  | -4.71538400 | H | -0.74380500 | -5.39137400 | -0.00344700 |
| C       | -2.15089000 | 0.00249400  | -3.69391500 | H | 1.74070800  | -5.82491700 | -0.00402800 |
| H       | -4.63550000 | -0.00143700 | 2.07600500  | H | 3.30824500  | -3.88674100 | -0.00277700 |
| H       | 1.57406300  | 0.00190900  | -2.70350500 | N | 0.35619400  | -2.18550800 | -0.00119400 |
| H       | 0.95444300  | 0.00348100  | -5.12347000 | N | 1.86293500  | 0.00000300  | -0.00000600 |
| H       | -1.48596200 | 0.00385600  | -5.75756300 | N | 0.35619300  | 2.18551300  | 0.00119000  |
| H       | -3.20702600 | 0.00266600  | -3.94203900 | C | -0.03219800 | 4.57259900  | 0.00291700  |
| C       | 0.53323500  | -0.00207400 | 3.00412600  | H | -0.74381300 | 5.39138000  | 0.00345800  |
| C       | -1.18262500 | -0.00319200 | 4.71538400  | C | 0.17896400  | -0.00298100 | 4.36514600  |
| C       | -2.15087900 | -0.00250700 | 3.69392400  | H | 0.95445600  | -0.00350700 | 5.12347200  |
| C       | -1.72933200 | -0.00160900 | 2.35542800  | C | 3.95370600  | -1.16289500 | -0.00051300 |
| H       | 1.57407100  | -0.00192100 | 2.70349100  | N | 4.64496800  | 0.00000700  | -0.00000700 |
| H       | -1.48593600 | -0.00388000 | 5.75756700  | N | -4.72845500 | 0.00000700  | 0.00000700  |
| H       | -3.20701500 | -0.00268100 | 3.94205200  | C | -4.04170000 | 0.00080400  | -1.16852100 |
| N       | -0.39259400 | -0.00138700 | 2.01681000  | H | 4.54583800  | -2.07059100 | -0.00079000 |
| N       | -1.96581800 | 0.00000100  | 0.00000200  | H | -4.63550900 | 0.00141900  | -2.07599200 |
| N       | -0.39259700 | 0.00138300  | -2.01680900 |   |             |             |             |
| C       | 2.53958700  | 1.18689400  | 0.00064000  |   |             |             |             |

|         |             |             |             |            |             |             |             |
|---------|-------------|-------------|-------------|------------|-------------|-------------|-------------|
| [Z12]3+ | H           | 1.27574700  | -5.53619900 | 1.50286200 |             |             |             |
| Co      | -0.00024500 | 0.00000000  | -0.00000100 | H          | 3.04226200  | -3.82514400 | 1.03800100  |
| C       | -2.53276000 | 0.31311900  | 1.15307000  | C          | -0.68070500 | 2.83244100  | -0.76912700 |
| C       | -2.53277400 | -0.31311900 | -1.15304400 | C          | -0.35467400 | 4.15307900  | -1.12759700 |
| C       | -3.94804700 | -0.30764500 | -1.13320600 | C          | 0.99787000  | 4.52329100  | -1.22787000 |
| C       | -1.60886700 | 0.61317900  | 2.25824000  | C          | 1.99257300  | 3.55904200  | -0.96594800 |
| C       | 0.68081700  | 0.76866400  | 2.83202600  | C          | 1.60889500  | 2.25843700  | -0.61282600 |
| C       | 0.35499000  | 1.12732500  | 4.15265400  | H          | -1.71626100 | 2.52745500  | -0.68670200 |
| C       | -0.99746800 | 1.22812700  | 4.52300200  | H          | -1.14874000 | 4.86649500  | -1.32145200 |
| C       | -1.99233400 | 0.96646000  | 3.55883400  | H          | 1.27573300  | 5.53620800  | -1.50285600 |
| H       | -4.54824500 | -0.54421200 | -2.00577200 | H          | 3.04224600  | 3.82514500  | -1.03802600 |
| H       | 1.71633300  | 0.68588300  | 2.52702800  | N          | 0.27280500  | 1.90342500  | -0.51652800 |
| H       | 1.14916100  | 1.32096200  | 4.86601300  | N          | 1.88502700  | 0.00000200  | -0.00001400 |
| H       | -1.27513200 | 1.50328400  | 5.53592800  | N          | 0.27281500  | -1.90342100 | 0.51652300  |
| H       | -3.04198000 | 1.03882300  | 3.82495900  | C          | -0.35465900 | -4.15306500 | 1.12761100  |
| C       | 0.68078400  | -0.76866700 | -2.83203300 | H          | -1.14871700 | -4.86649300 | 1.32149400  |
| C       | -0.99752100 | -1.22813700 | -4.52299100 | C          | 0.35494300  | -1.12733100 | -4.15265400 |
| C       | -1.99237700 | -0.96646900 | -3.55881600 | H          | 1.14909900  | -1.32097400 | -4.86603800 |
| C       | -1.60889600 | -0.61318200 | -2.25822400 | C          | 3.94784500  | 1.13329100  | -0.30745900 |
| H       | 1.71630200  | -0.68588200 | -2.52704000 | N          | 4.62511700  | 0.00000000  | -0.00002200 |
| H       | -1.27518700 | -1.50329800 | -5.53591500 | N          | -4.62529100 | -0.00000400 | 0.00002400  |
| H       | -3.04202500 | -1.03883400 | -3.82493300 | C          | -3.94803300 | 0.30764600  | 1.13324100  |
| N       | -0.27284200 | -0.51644900 | -1.90298400 | H          | 4.54799500  | 2.00594600  | -0.54383700 |
| N       | -1.88527300 | -0.00000100 | 0.00001000  | H          | -4.54823000 | 0.54420100  | 2.00582200  |
| N       | -0.27281700 | 0.51644700  | 1.90298400  |            |             |             |             |
| C       | 2.53257700  | -1.15310300 | 0.31285800  |            |             |             |             |
| C       | 2.53257100  | 1.15310500  | -0.31289600 |            |             |             |             |
| C       | 3.94784900  | -1.13329700 | 0.30741000  |            |             |             |             |
| C       | 1.60890700  | -2.25843400 | 0.61280500  |            |             |             |             |
| C       | -0.68069500 | -2.83243200 | 0.76914000  |            |             |             |             |
| C       | 0.99788700  | -4.52328300 | 1.22786900  |            |             |             |             |
| C       | 1.99258900  | -3.55903900 | 0.96593000  |            |             |             |             |
| H       | 4.54799600  | -2.00594100 | 0.54380700  |            |             |             |             |
| H       | -1.71625100 | -2.52743900 | 0.68673300  |            |             |             |             |
